# Supplementary material
Source: publisher site journal article supplement (https://www.degruyterbrill.com/publication/isbn/9783110336061/downloadAsset/9783110336061_List-of-Figures-and-Tables.pdf)
Supplement: Supplementary file 1 [file 9783110336061_List-of-Figures-and-Tables.pdf]

# **Public Health**

Matthias Egger / Oliver Razum (Hrsg.)

ISBN: 978-3-11-031073-3

© 2014 by Walter de Gruyter GmbH, Berlin/Boston

**Abbildungsübersicht / List of Figures**

**Tabellenübersicht / List of Tables**

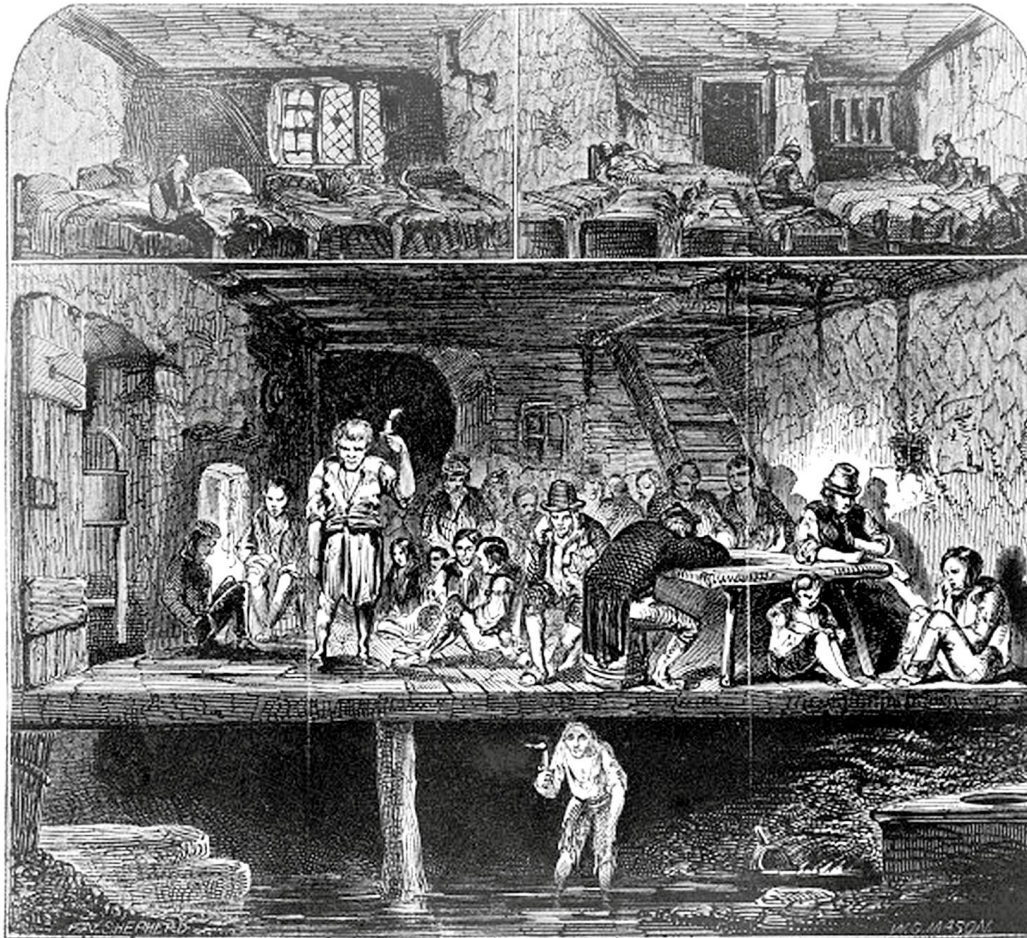

**Abb. 1.1:** Eine Londoner Behausung an der Themse im 19. Jahrhundert. Die Notdurft wurde am Fluss verrichtet (Quelle: Wellcome Images. <http://images.wellcome.ac.uk/>).

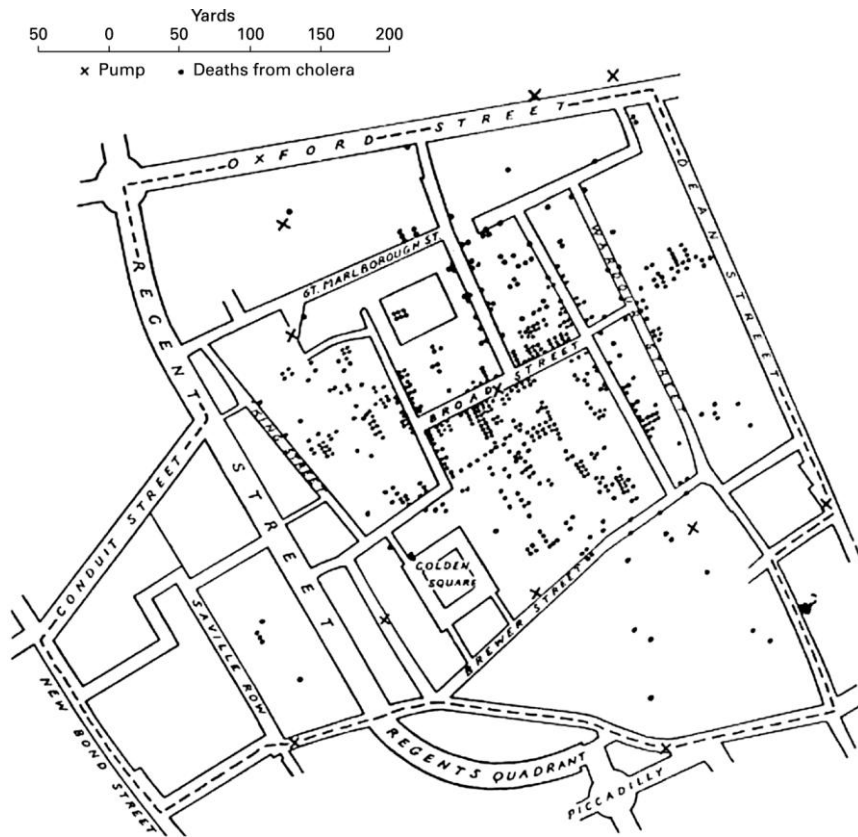

**Abb. 1.2:** Karte der Cholera-Todesfälle im Rahmen der Epidemie von 1854, die rund um die Broad-Street-Wasserpumpe auftraten. Der Epidemiologe John Snow (1813–1858, s. a. Kap. 2.1.1) folgerte hieraus, dass die Cholera durch verschmutztes Trinkwasser übertragen wird und entfernte den Pumpengriff, um weitere Ansteckungen zu verhindern. (Rekonstruktion der Karte nach Snows Angaben durch den medizinischen Geografen E.W. Gilbert, 1958) (Quelle: Gilbert E.W. Pioneer map and health and disease in England. *Geographical Journal* 1958; 124(2): 172–183).

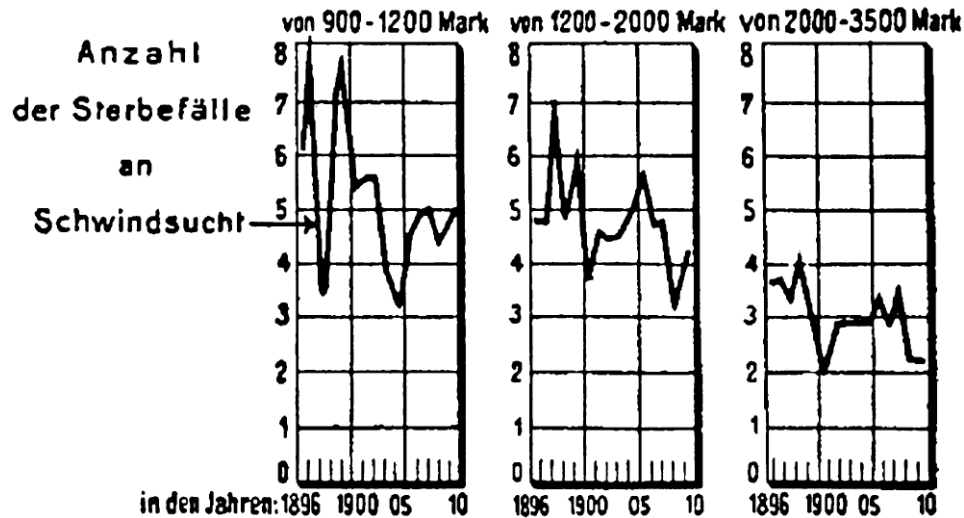

**Abb. 1.3:** Beispiel einer sozialhygienischen Studie, die zu Beginn des 20. Jh. in Deutschland durchgeführt wurde. Die Grafik zeigt das Einkommen (in Mark) und die Tuberkulosesterblichkeit (pro 1.000 Einwohner) in Hamburg in den Jahren zwischen 1896 und 1910. Menschen mit höherem Einkommen wiesen eine deutlich niedrigere Sterblichkeit an Tuberkulose auf als Menschen aus niedrigeren Einkommensschichten (Quelle: Mosse M, Tugendreich G. Krankheit und Soziale Lage, 1913).



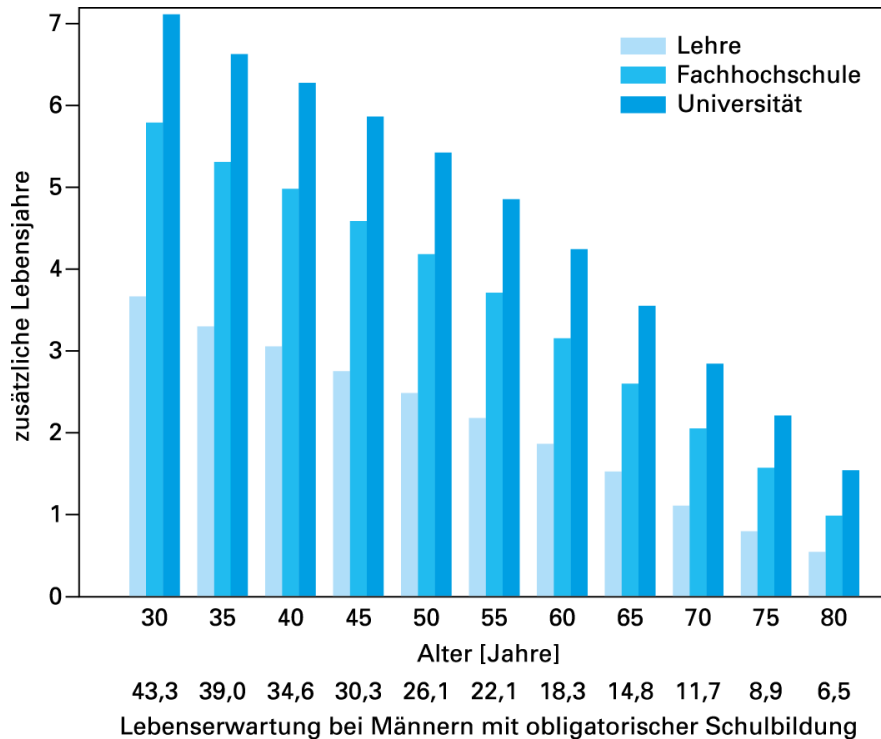

**Abb. 1.4:** Die weitere Lebenserwartung bei Männern in der Schweiz in Abhängigkeit von Alter und Bildung. Die Zahlen der unteren Zeile geben die Lebenserwartung bei Männern mit obligatorischer Schulbildung (Primarschule) an. Die Balken darüber zeigen die zusätzliche Anzahl an Lebensjahren bei Männern mit einer Berufsbildung in einer Firma (Lehre) und bei Männern mit einem Diplom einer Fachhochschule bzw. Universität. (Quelle: Spörri et al. Swiss Medical Weekly, 2006).

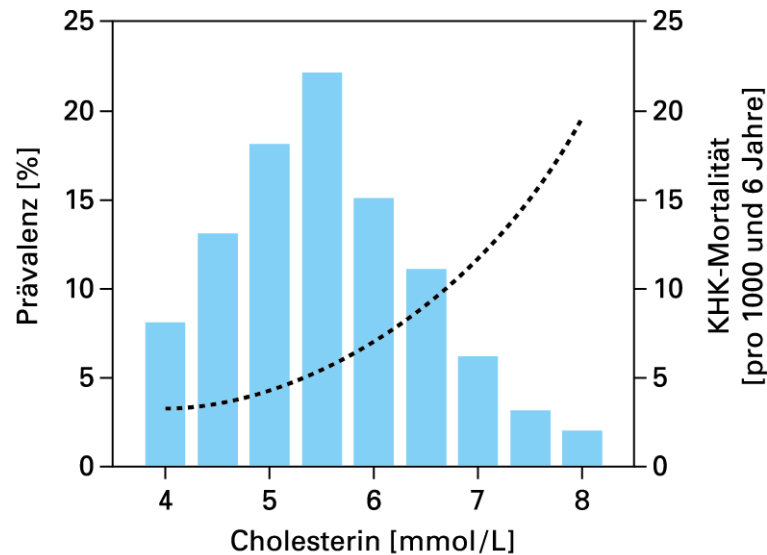

Durch erhöhtes Cholesterin verursachte KHK-Todesfälle [%]: 4 8 17 22 19 13 9 8

Hochrisikostategie

**Abb. 1.5:** Verteilung der Serumcholesterinwerte bei Männern in Korrelation zum Risiko, an einer koronaren Herzkrankheit (KHK) zu sterben [Säulen] sowie Anzahl der KHK-Todesfälle pro 1.000 Männer innerhalb von 6 Jahren im Verhältnis zu ihren Cholesterinwerten [gestrichelte Linie]. Die Hochrisikostategie zielt auf eine Reduktion des Risikos von Männern mit deutlich erhöhten Werten. Unter den Verstorbenen sind aber wesentlich mehr Männer mit mäßig als mit stark erhöhten Cholesterinwerten. (Quelle: modifiziert nach Rose G. The Strategy of Preventive Medicine. Oxford University Press, 1992)

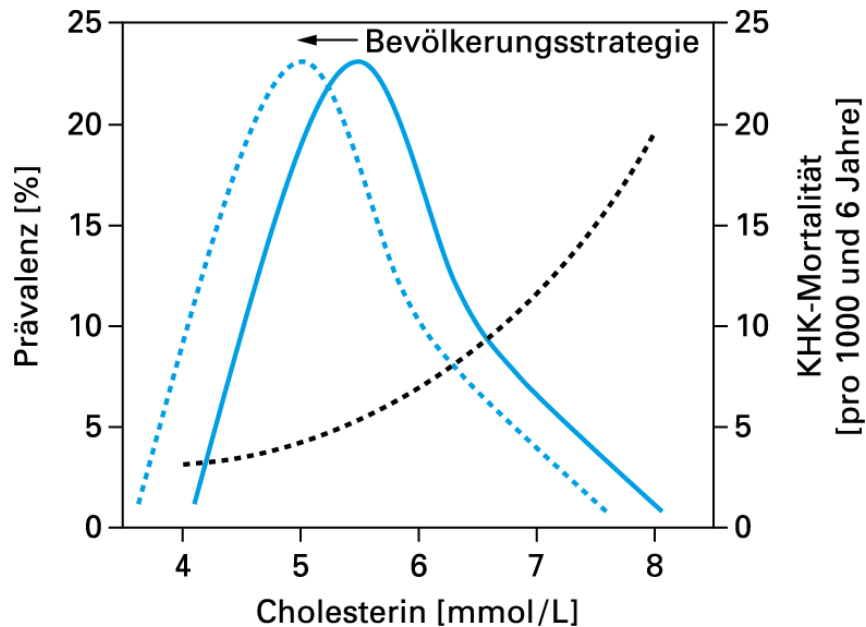

**Abb. 1.6:** Verteilungen der Serumcholesterinwerte [grüne durchgezogene Linie] in der männlichen Bevölkerung und des auf den Cholesterinwert bezogenen Risikos bei Männern, an einer koronaren Herzkrankheit (KHK) zu sterben [schwarze gestrichelte Linie]. Die Populationsstrategie zielt auf die Verschiebung der gesamten Cholesterinverteilung in Richtung günstigerer Werte [grüne gestrichelte Linie] und reduziert deshalb das Risiko aller Männer, an einer KHK zu versterben. (Quelle: modifiziert nach Rose G. The Strategy of Preventive Medicine. Oxford University Press, 1992)

|                   | <i>Bevölkerungsstrategie</i>                                                                                                                                                                                 | <i>Hochrisikostategie</i>                                                                                                                                                                                                              |
|-------------------|--------------------------------------------------------------------------------------------------------------------------------------------------------------------------------------------------------------|----------------------------------------------------------------------------------------------------------------------------------------------------------------------------------------------------------------------------------------|
| <i>Zielgruppe</i> | Gesamte Bevölkerung                                                                                                                                                                                          | Risikogruppen                                                                                                                                                                                                                          |
| <i>Ansatz</i>     | Periphere (gesellschaftliche) Ursachen                                                                                                                                                                       | Unmittelbare (biologisch-individuelle) Ursachen                                                                                                                                                                                        |
| <i>Vorteile</i>   | Potentiell großer Nutzen für die Bevölkerung <i>und</i> für Hochrisikogruppe<br>Beeinflusst zugrunde liegende Ursachen                                                                                       | Intervention wird Individuum gerecht<br>Hohe Motivation von Betroffenen und Gesundheitssystem<br>Politisch einfach umzusetzen                                                                                                          |
| <i>Nachteile</i>  | Nutzen für das Individuum wenig sichtbar<br>Konflikte mit kulturellen Normen oder wirtschaftlichen Interessen<br>Politisch schwierig umzusetzen                                                              | Nutzen für Bevölkerung klein<br>„Symptombekämpfung“<br>„Labeling“ <sup>1</sup> und Medikalisierung der Betroffenen                                                                                                                     |
| <i>Beispiele</i>  | Reduktion des Salzgehalts in verarbeiteten Lebensmitteln<br>Tragen von Sicherheitsgurten im Auto<br>Einschränkung des Zugangs zu Schusswaffen<br>Kampagnen zur Förderung des Konsums von Früchten und Gemüse | Medikamente oder Diätberatung zur Senkung von Cholesterin, Blutdruck oder Körpergewicht in der Primärprävention<br>Interventionen der Sekundär- und Tertiärprävention, z. B. Rückenschule bei Menschen mit chronischen Rückenschmerzen |

1 Labeling: Den betroffenen Personen wird pauschal eine bestimmte Eigenschaft zugeschrieben.

**Tab. 1.1:** Merkmale der Bevölkerungs- und der Hochrisikostategie.

| Medizin                                                                                                                                                                                                                                                                                                                                                                                                                                                                                                                                                                                                                                                                                           | Public Health                                                                                                                                                                                                                                                                                                                                                                                                                                                                                                                                                                                                                  |
|---------------------------------------------------------------------------------------------------------------------------------------------------------------------------------------------------------------------------------------------------------------------------------------------------------------------------------------------------------------------------------------------------------------------------------------------------------------------------------------------------------------------------------------------------------------------------------------------------------------------------------------------------------------------------------------------------|--------------------------------------------------------------------------------------------------------------------------------------------------------------------------------------------------------------------------------------------------------------------------------------------------------------------------------------------------------------------------------------------------------------------------------------------------------------------------------------------------------------------------------------------------------------------------------------------------------------------------------|
| <p>Autonomie (<i>Respect for autonomy</i>)</p> <p>Jede Person ist frei in ihren Entscheidungen. Bei medizinischen Maßnahmen oder der Teilnahme an einer Studie muss die informierte Zustimmung (<i>Informed Consent</i>) der betroffenen Personen vorliegen.</p> <p>Fürsorge (<i>Beneficence und Non-maleficence</i>)</p> <p>Schädliche oder riskoreiche Eingriffe und Maßnahmen sollen vermieden werden. Durch die Maßnahme/Studie wird das Wohl der PatientInnen oder StudienteilnehmerInnen gefördert.</p> <p>Gerechtigkeit (<i>Justice</i>)</p> <p>Das Prinzip der Gerechtigkeit fordert eine faire Verteilung von Gesundheitsleistungen, Risiken und Nutzen in der klinischen Forschung.</p> | <p>Gegenseitige Abhängigkeit (<i>Interdependence</i>)</p> <p>Das Handeln einer Person betrifft nicht nur sie selbst, sondern auch andere Personen. Jede Person ist auch von den Aktionen anderer betroffen.</p> <p>Mitwirkung (<i>Participation</i>)</p> <p>Public-Health-Maßnahmen werden unter Mitsprache und mit dem Einverständnis der betroffenen Bevölkerung geplant und durchgeführt.</p> <p>Wissenschaftliche Abstützung (<i>Scientific evidence</i>)</p> <p>Entscheidungen über Public-Health-Maßnahmen sollen aufgrund von wissenschaftlichen Daten und nicht auf der Basis von Annahmen und Meinungen erfolgen.</p> |

**Tab. 1.2:** Übersicht über die wichtigsten ethischen Prinzipien im Bereich der Medizinethik und der Public-Health-Ethik.



|                   |             | <i>Outcome</i> |             | <i>Summe</i> |
|-------------------|-------------|----------------|-------------|--------------|
|                   |             | <i>Ja</i>      | <i>Nein</i> |              |
| <i>Exposition</i> | <i>Ja</i>   | a              | b           | a+b          |
|                   | <i>Nein</i> | c              | d           | c+d          |
| <i>Summe</i>      |             | a+c            | b+d         | a+b+c+d      |

**Tab. 2.1:** Gerüst einer Vier-Felder-Tafel.

|                                      |      | Outcome (VTE) |     |      |        |         |         |
|--------------------------------------|------|---------------|-----|------|--------|---------|---------|
|                                      |      | Ja            |     | Nein |        |         |         |
| Exposition<br>(Neuroleptikaeinnahme) | Ja   | 2.126         | a   | b    | 4.752  | a+b     | 6.878   |
|                                      | Nein | 23.406        | c   | d    | 84.739 | c+d     | 108.145 |
| Summe                                |      | 25.532        | a+c | b+d  | 89.491 | a+b+c+d | 115.023 |

**Tab. 2.2:** Vier-Felder-Tafeln zum Zusammenhang von Neuroleptikaeinnahme und venöser Thromboembolie (VTE).

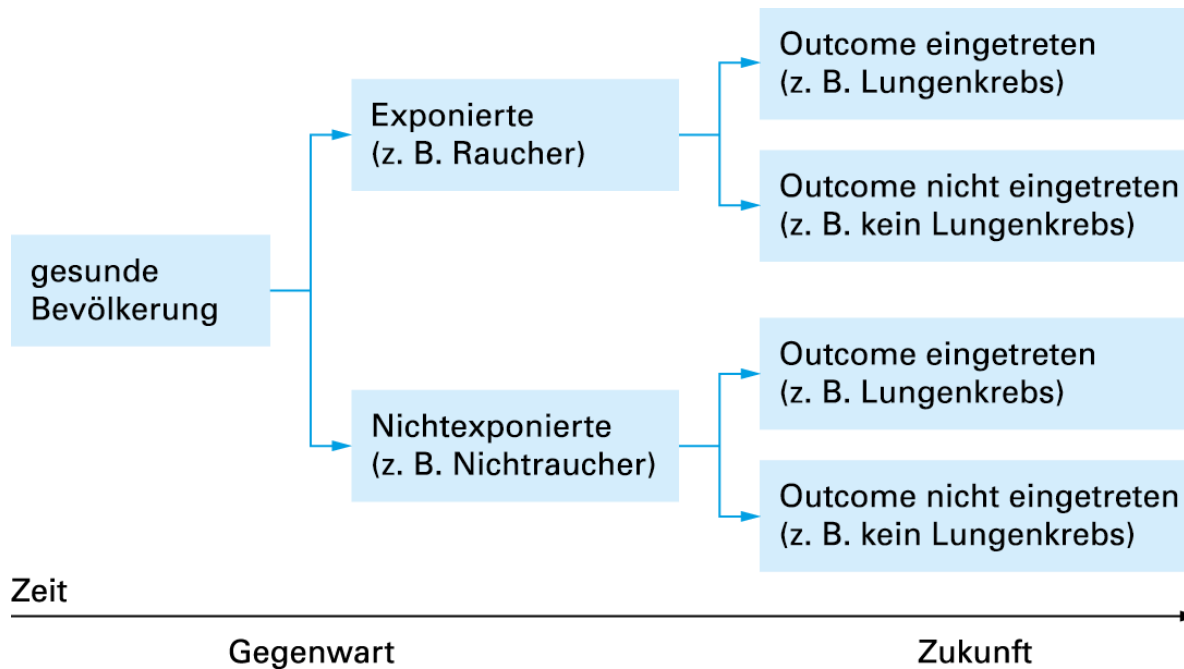

**Abb. 2.1:** Schema einer Kohortenstudie.

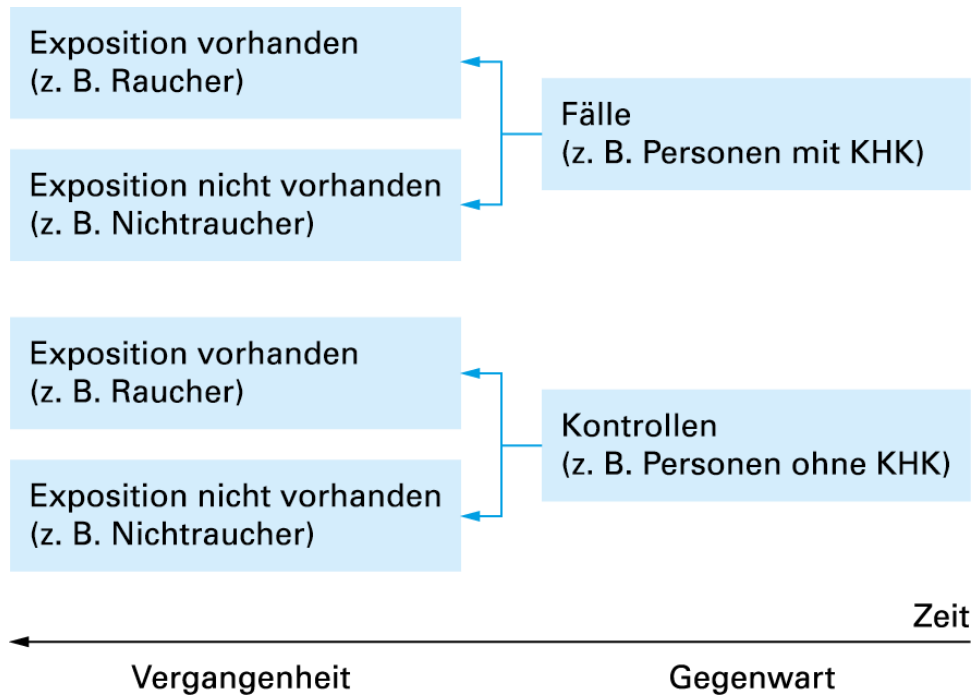

**Abb. 2.2:** Schema einer Fall-Kontroll-Studie.

**Abb. 2.3:** Schematischer Ablauf einer randomisierten, kontrollierten Studie (RCT).

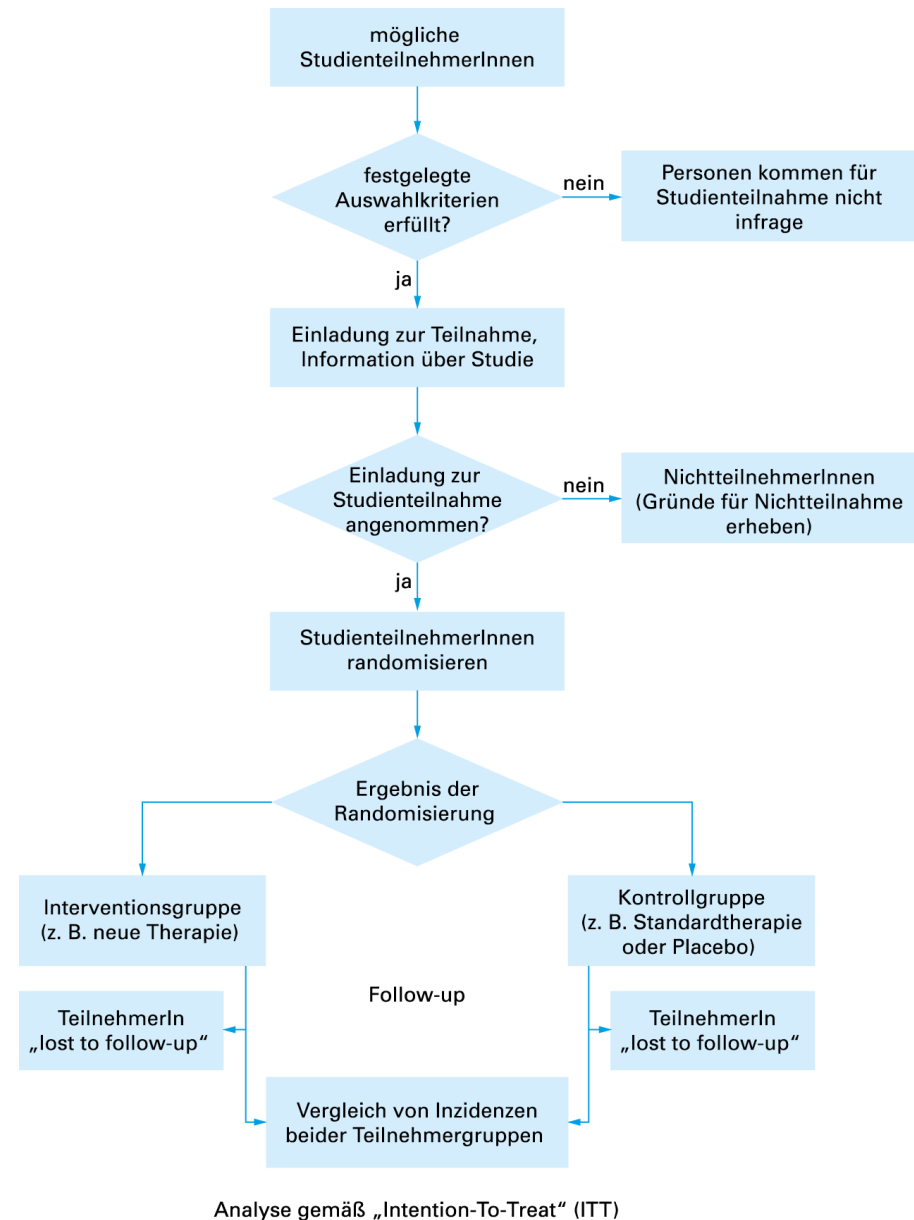



**Abb. 2.4:** Meta-Analyse von randomisierten, klinischen Studien zur sekundärpräventiven Wirksamkeit einer Therapie mit Betablockern bei PatientInnen nach Myokardinfarkt.

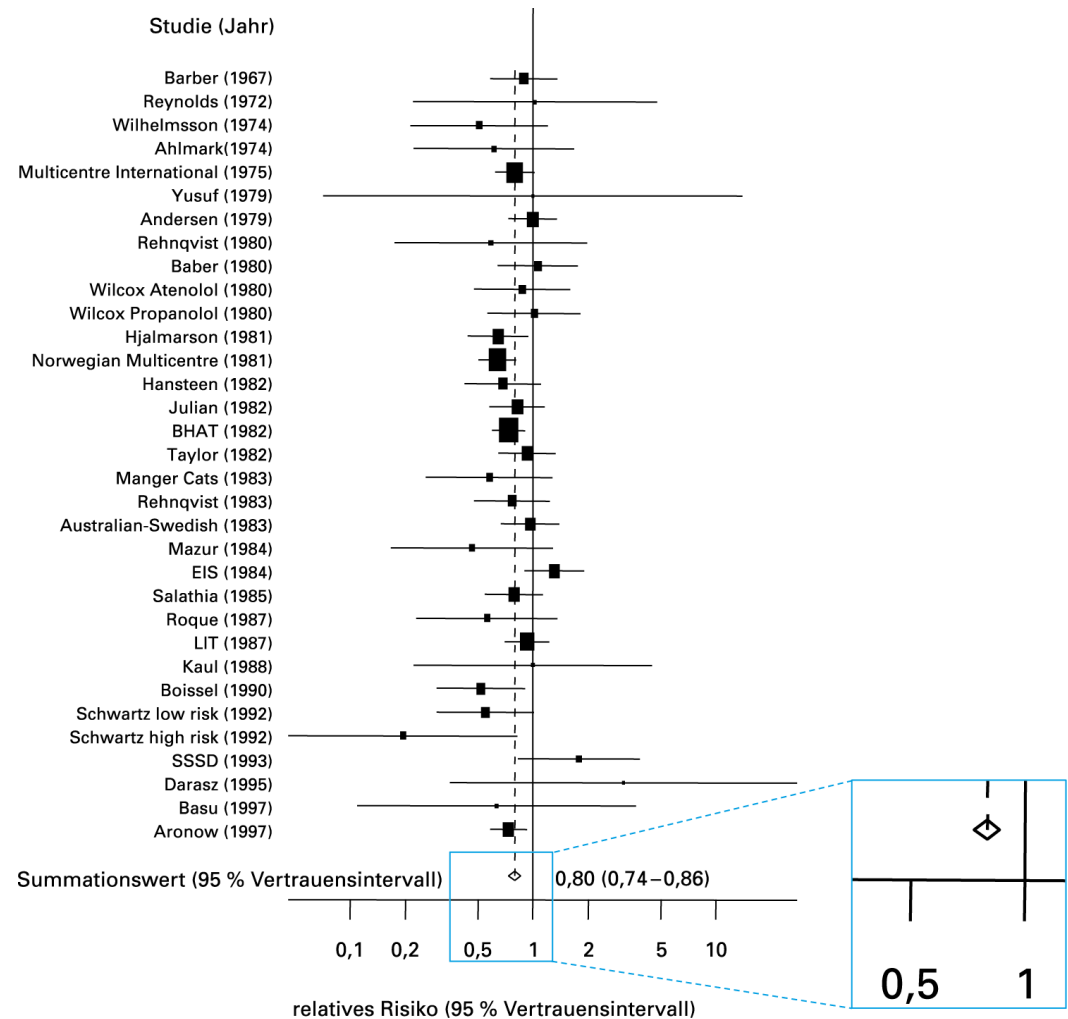

### Nicht-differenzielle Missklassifikation

|                                      |      | Outcome (VTE) |     |      |        | Summe   |         |
|--------------------------------------|------|---------------|-----|------|--------|---------|---------|
|                                      |      | Ja            |     | Nein |        |         |         |
| Exposition<br>(Neuroleptikaeinnahme) | Ja   | 3.296         | a   | b    | 8.989  | a+b     | 12.285  |
|                                      | Nein | 22.236        | c   | d    | 80.502 | c+d     | 102.738 |
| Summe                                |      | 25.532        | a+c | b+d  | 89.491 | a+b+c+d | 115.023 |

$$\text{Odds Ratio} = (3.296 \cdot 80.502) / (8.989 \cdot 22.236) = 1,33$$

### Differenzielle Missklassifikation

|                                      |      | Outcome (VTE) |     |      |        | Summe   |         |
|--------------------------------------|------|---------------|-----|------|--------|---------|---------|
|                                      |      | Ja            |     | Nein |        |         |         |
| Exposition<br>(Neuroleptikaeinnahme) | Ja   | 4.467         | a   | b    | 8.989  | a+b     | 13.456  |
|                                      | Nein | 21.065        | c   | d    | 80.502 | c+d     | 101.567 |
| Summe                                |      | 25.532        | a+c | b+d  | 89.491 | a+b+c+d | 115.023 |

$$\text{Odds Ratio} = (4.467 \cdot 80.502) / (8.989 \cdot 21.065) = 1,90$$

**Tab. 2.3:** Vier-Felder-Tafel zum Zusammenhang von Neuroleptikaeinnahme und venöser Thromboembolie (VTE; Zahlen nach Parker et al. 2010, s. Tab. 2.2) mit einer hypothetischen fünfprozentigen *nicht-differenziellen* Missklassifikation (oben) und einer hypothetischen *differenziellen* Missklassifikation (unten).

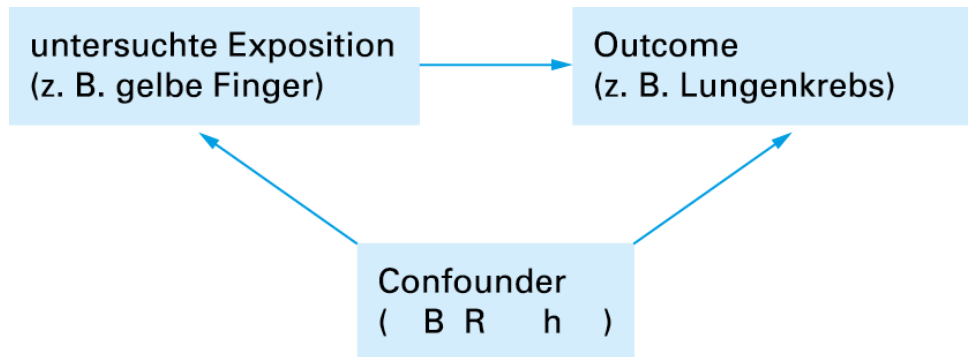

**Abb. 2.5:** Schematische Darstellung von Confounding am Beispiel der Assoziation von gelben Fingern und Lungenkrebs; nach: Davey Smith G, Phillips AN. Confounding in epidemiological studies: why “independent” effects may not be all they seem. *British Medical Journal* 1992; 305: 757–759.

|                                             |      | Effektmodifikator (Rauchen) |      |
|---------------------------------------------|------|-----------------------------|------|
|                                             |      | Nein                        | Ja   |
| Exposition<br>(Hepatitis-B-Virus-Infektion) | Nein | 1,0 (Referenz)              | 1,9  |
|                                             | Ja   | 15,8                        | 21,6 |

**Tab. 2.4:** Relatives Risiko für die Entwicklung von Leberkrebs in Abhängigkeit von einer vorherigen Hepatitis-B-Virus-Infektion (Exposition) und von der Frage, ob die betroffene Person Raucher ist (Effektmodifikator); Quelle der Originaldaten: Chuang SC, Lee YC, Hashibe M, Dai M, Zheng T, Boffetta P. Interaction between cigarette smoking and hepatitis B and C virus infection on the risk of liver cancer: a meta-analysis. Cancer Epidemiology, Biomarkers and Prevention 2010; 19: 1261–1268.

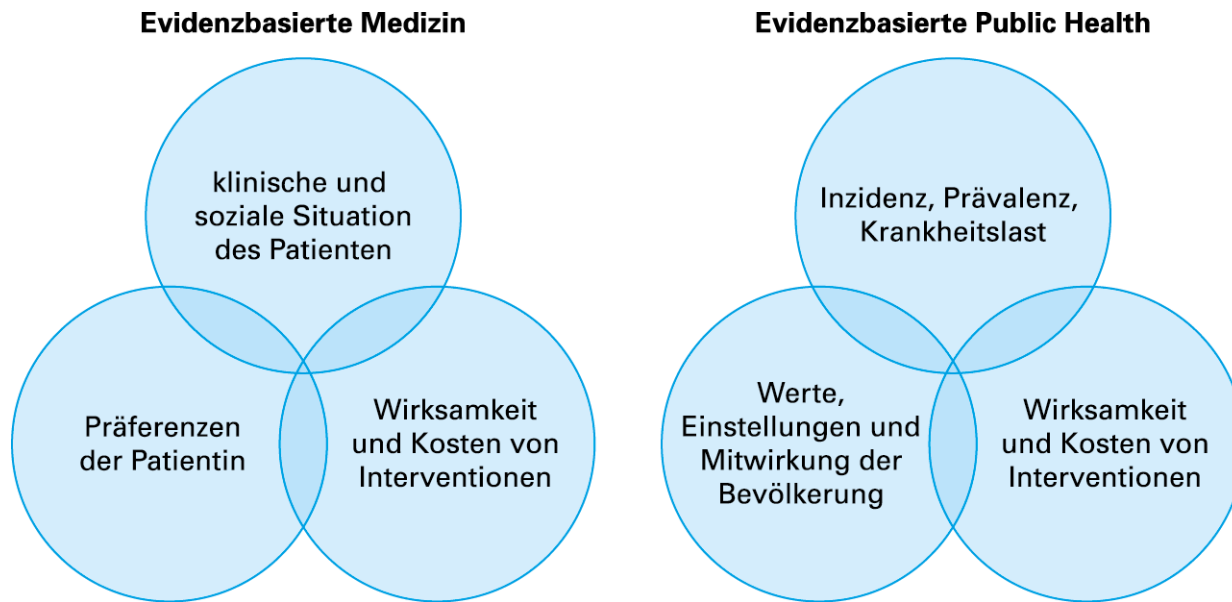

**Abb. 2.6:** Grundlagen für evidenzbasierte Entscheidungen in der klinischen Praxis und in Public Health.



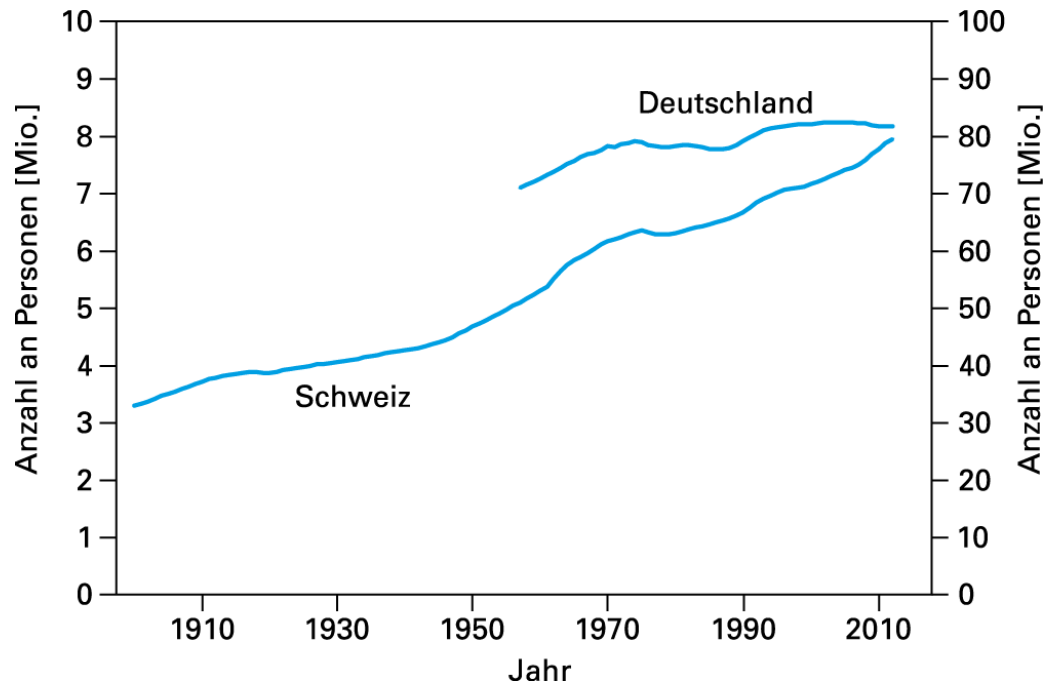

**Abb. 2.7:** Bevölkerungsentwicklung in Deutschland und der Schweiz. Die Skala links bezieht sich auf die Bevölkerungszahlen der Schweiz, die rechte Skala auf die entsprechenden Zahlen in Deutschland.

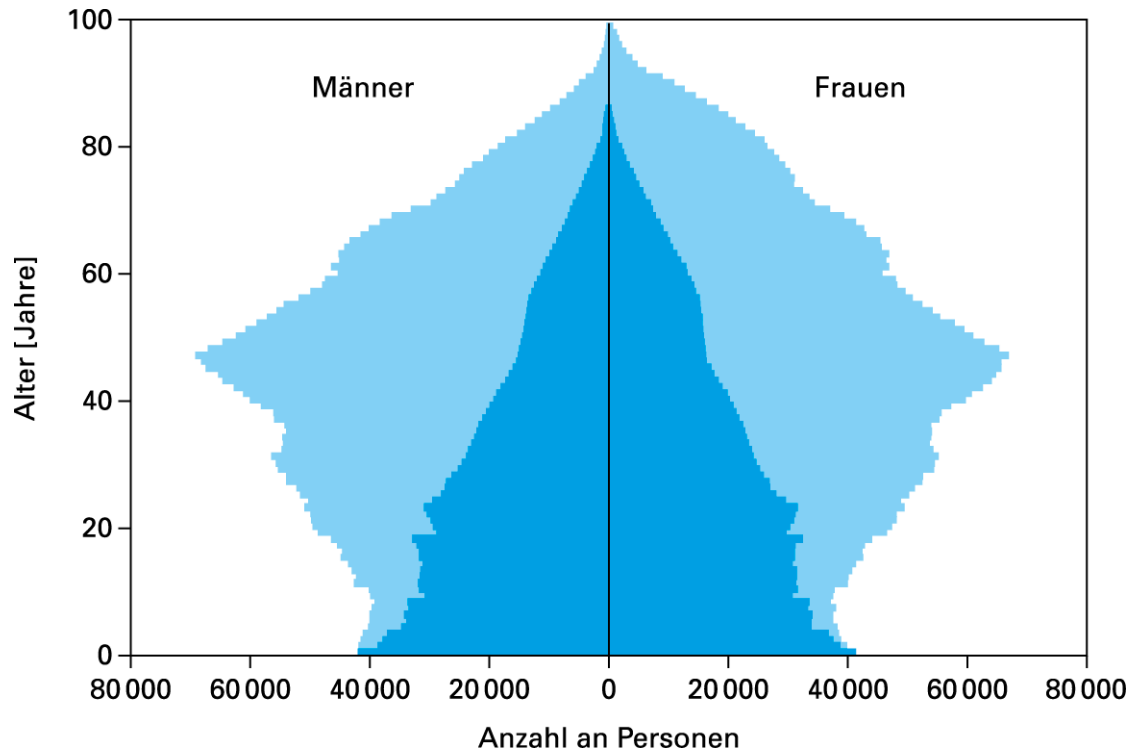

**Abb. 2.8:** Altersstruktur der Bevölkerung in der Schweiz in den Jahren 1900 (dunkelgrün) und 2012 (hellgrün).

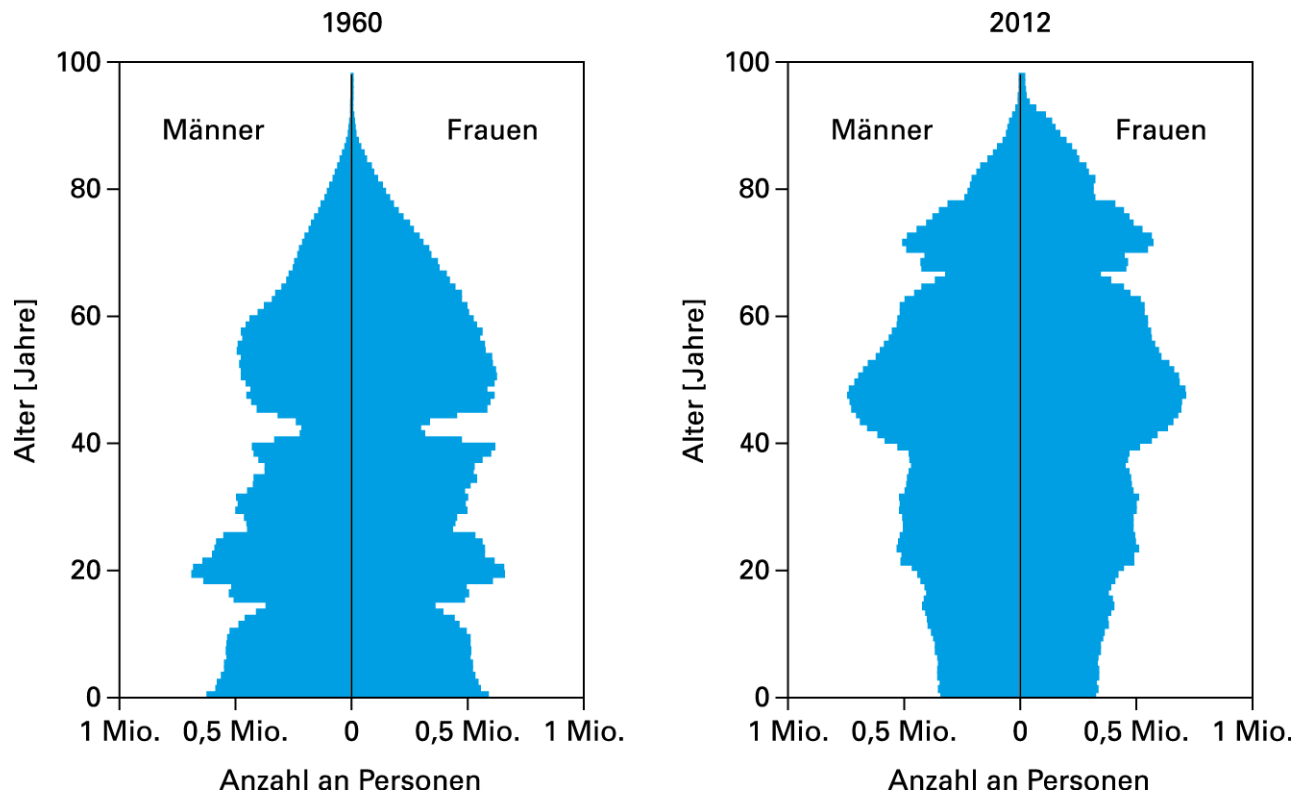

**Abb. 2.9:** Altersstruktur der Bevölkerung in Deutschland (West- und Ost-Deutschland zusammengezählt) in den Jahren 1960 und 2012.

|                                    | Jahr |                |                |
|------------------------------------|------|----------------|----------------|
|                                    | 2010 | 2020           | 2030           |
| Deutschland                        |      |                |                |
| Gesamtbevölkerung (in Mio.)        | 81,5 | 79,9 (–2,0 %)  | 77,4 (–5,0 %)  |
| Personen älter als 65 Jahre (in %) | 20,6 | 23,3 (+13,1 %) | 28,8 (+39,8 %) |
| Schweiz                            |      |                |                |
| Gesamtbevölkerung (in Mio.)        | 7,86 | 8,40 (+6,9 %)  | 8,74 (+11,2 %) |
| Personen älter als 65 Jahre (in %) | 17,1 | 20,1 (+17,5 %) | 24,2 (+41,5 %) |

Quellen: Statistisches Bundesamt. Bevölkerung Deutschlands bis 2060, Ergebnisse der 12. Koordinierten Bevölkerungsvorausberechnung ([www.destatis.de](http://www.destatis.de)); Bundesamt für Statistik. Szenarien zur Bevölkerungsentwicklung der Schweiz: 2010–2060. Neuchâtel 2010 ([www.bfs.admin.ch](http://www.bfs.admin.ch)).

**Tab 2.5:** Prognosen zur Bevölkerungsentwicklung in Deutschland und in der Schweiz.

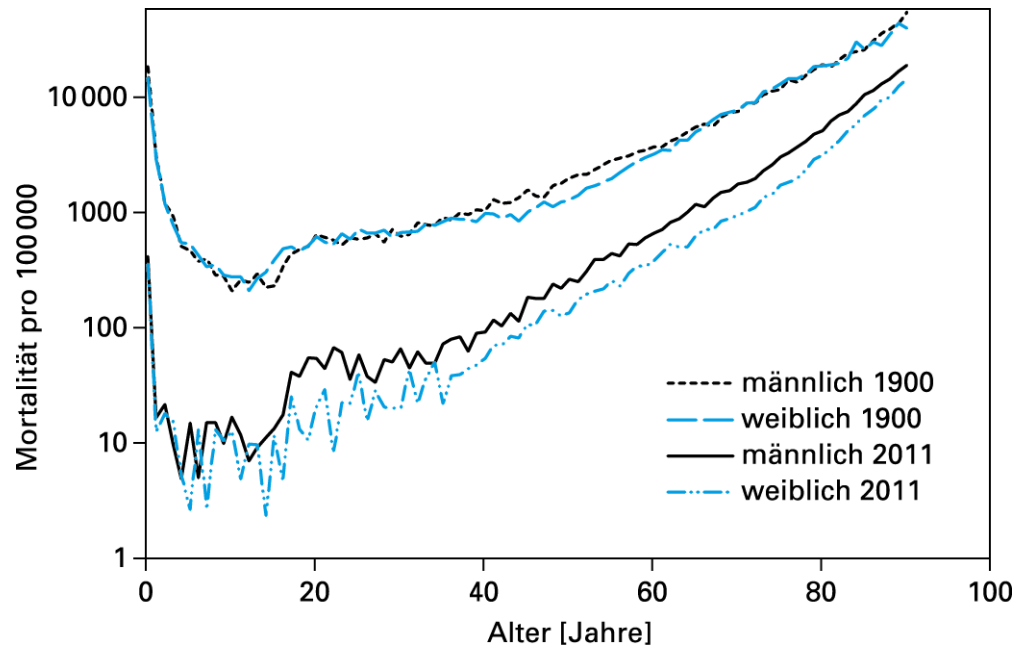

**Abb. 2.10:** Mortalitätsraten pro 100.000 Personen in der Schweiz in den Jahren 1900 und 2011, berechnet nach Altersgruppen und Geschlecht. Die y-Achse weist eine logarithmische Skala auf (Quelle: The Human Mortality Database; [www.mortality.org](http://www.mortality.org)).



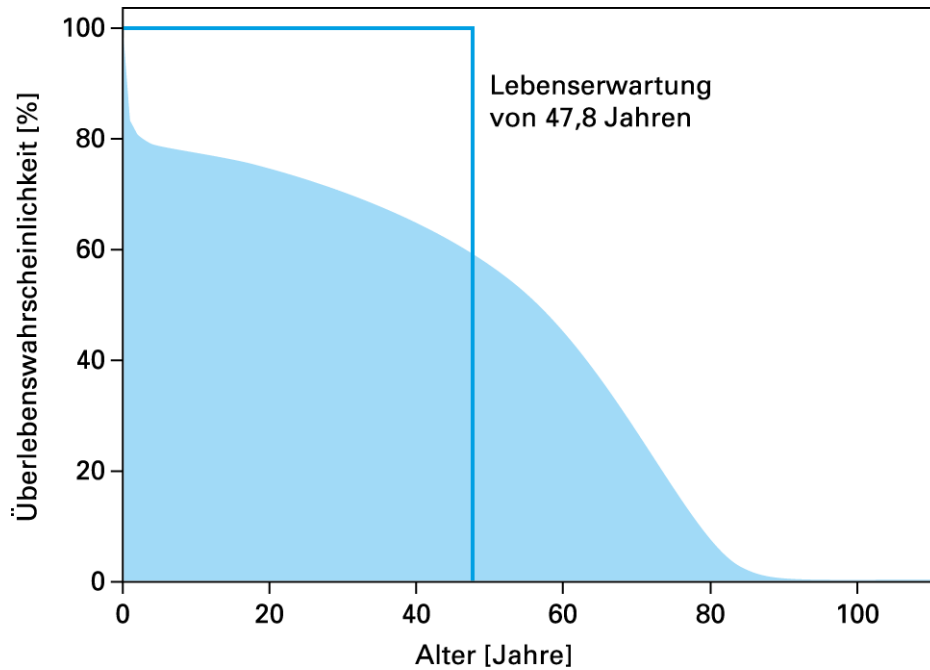

**Abb. 2.11:** Überlebenskurve einer hypothetischen Gruppe von lebend geborenen Mädchen, die mit den Schweizer Mortalitätsraten von 1900 versterben würden. Die grün gefärbte Fläche unter der Überlebenskurve entspricht der Fläche des eingezeichneten Rechtecks.

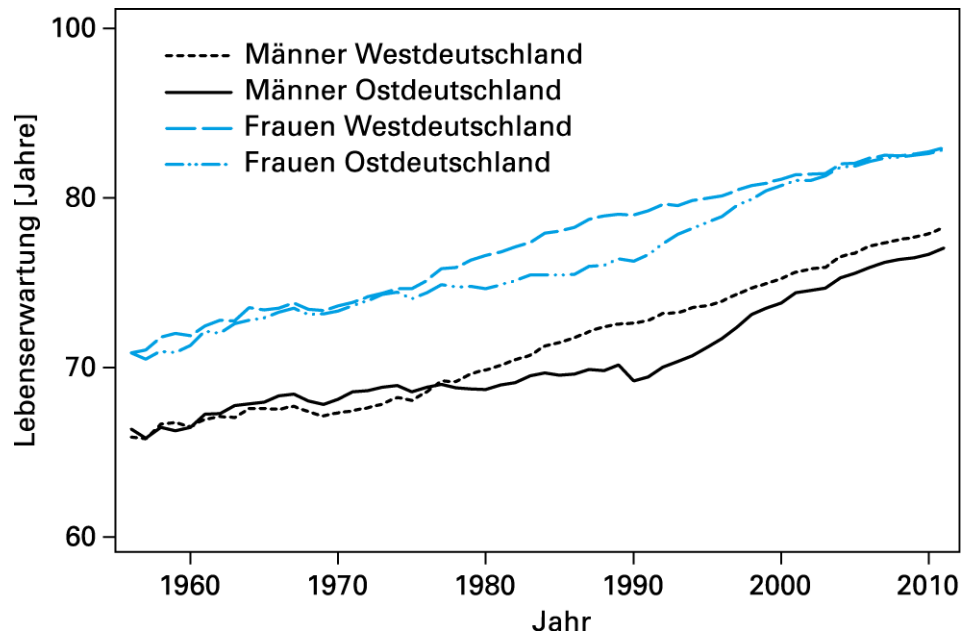

**Abb. 2.12:** Durchschnittliche Lebenserwartung ab Geburt in Deutschland zwischen 1956 und 2011 (Quelle: The Human Mortality Database; [www.mortality.org](http://www.mortality.org)).

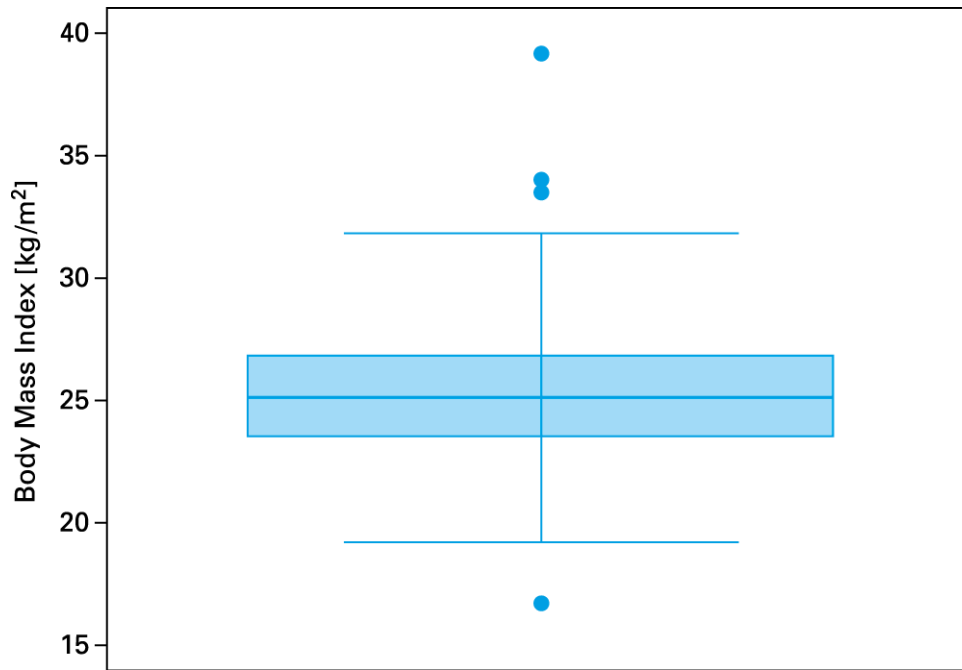

**Abb. 2.13:** Boxplot-Darstellung der BMI-Werte der 200 Personen aus dem Anwendungsbeispiel. Bei den Punkten außerhalb der Whisker handelt es sich um so genannte Ausreißerwerte.

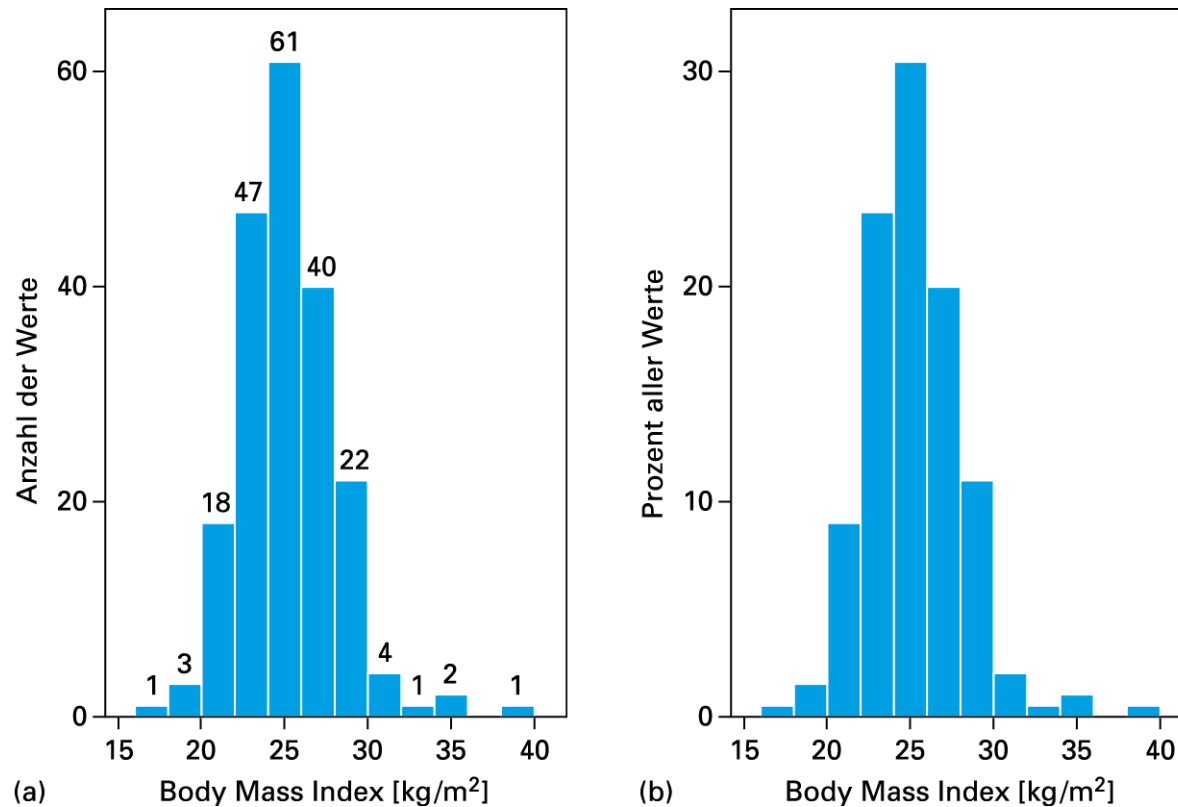

**Abb. 2.14:** Histogramm der BMI-Werte der 200 Personen aus dem Anwendungsbeispiel.

(a) Histogramm, bei dem die Anzahl der Werte in der jeweiligen Wertegruppe angegeben sind. (b) Histogramm, das die jeweiligen Prozentsätze angibt.

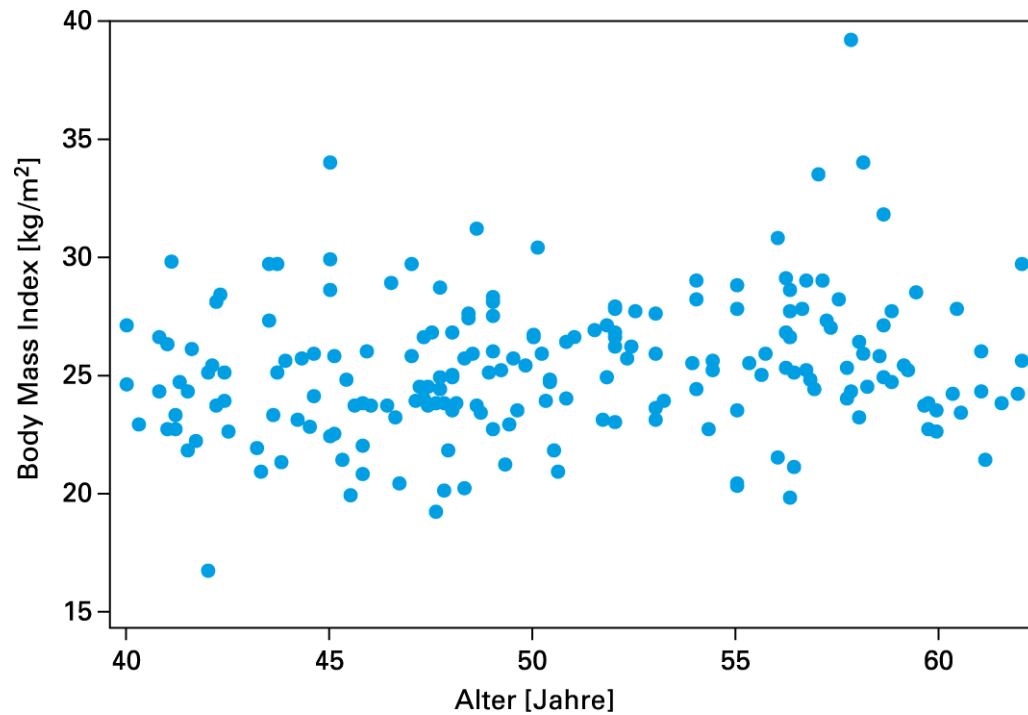

**Abb. 2.15:** Streudiagramm (*Scatter Plot*), das das Alter der 200 Personen aus dem Anwendungsbeispiel zu ihrem Body Mass Index in Relation setzt.

|                                        | Vorteil                                                                                               | Nachteil                                                              |
|----------------------------------------|-------------------------------------------------------------------------------------------------------|-----------------------------------------------------------------------|
| <i>Kennzahlen für die Mitte</i>        |                                                                                                       |                                                                       |
| Mittelwert                             | Einfach zu berechnen, gute statistische Eigenschaften                                                 | Reagiert empfindlich auf Ausreißerwerte                               |
| Median                                 | Einfach zu verstehen, reagiert nicht sensibel auf Ausreißerwerte (= robust gegenüber Ausreißerwerten) | Hat komplexe statistische Eigenschaften                               |
| <i>Kennzahlen für die Variabilität</i> |                                                                                                       |                                                                       |
| Standardabweichung                     | Hat gut verstandene statistische Eigenschaften                                                        | Ist kompliziert zu berechnen, reagiert empfindlich auf Ausreißerwerte |
| Interquartilbereich                    | Einfach zu verstehen: 50 % aller Werte liegen in diesem zentralen Bereich                             | Hat komplexe statistische Eigenschaften                               |

**Tab 2.6:** Vor- und Nachteile der Kennzahlen quantitativer Daten.

| Zivilstand      | Männer | Frauen |
|-----------------|--------|--------|
| Ledig           | 26,5 % | 18,5 % |
| Verheiratet     | 64,8 % | 68,7 % |
| Verwitwet       | 0,6 %  | 1,4 %  |
| Geschieden      | 6,3 %  | 9,4 %  |
| Getrennt lebend | 1,8 %  | 2,0 %  |
| Gesamt          | 100 %  | 100 %  |

**Tab. 2.7:** Zivilstand (Personenstand) der 30- bis 49-jährigen Männer und Frauen in der Schweiz (Schweizerische Gesundheitsbefragung 2007).

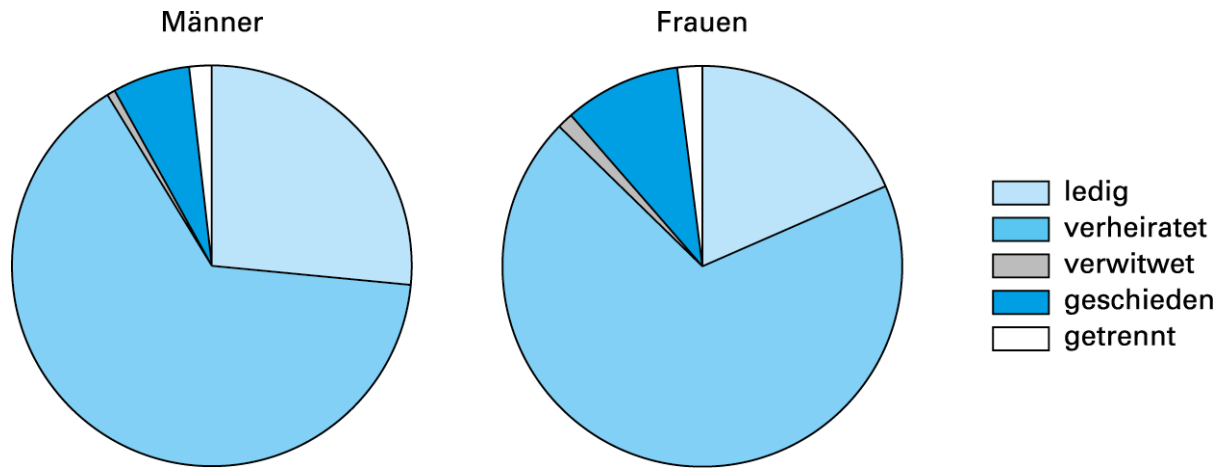

**Abb. 2.16:** Kuchengrafik, die den Zivilstand (Personenstand) der 30- bis 49-jährigen Männer und Frauen in der Schweiz wiedergibt (Schweizerische Gesundheitsbefragung 2007; die genauen Prozentsätze zeigt Tab. 2.7).



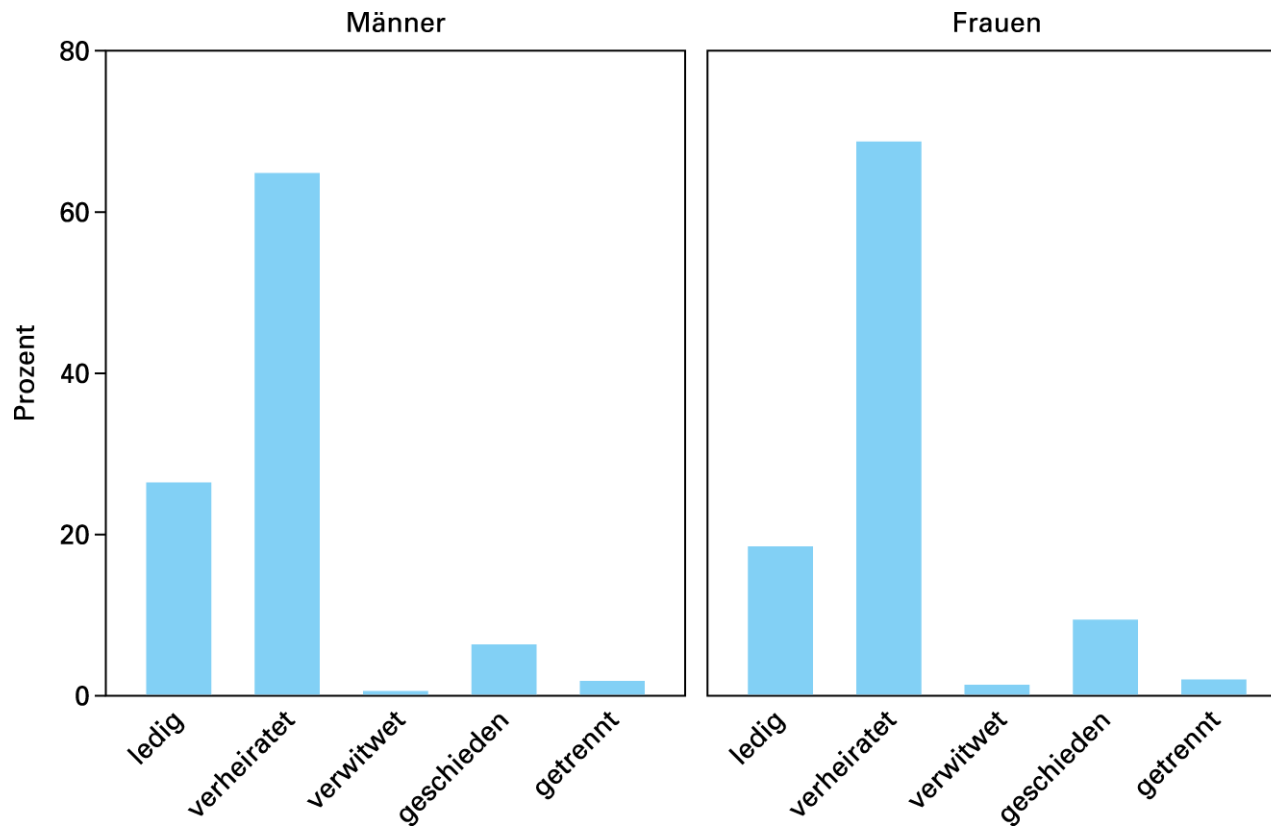

**Abb. 2.17:** Häufigkeitsgrafik, die den Zivilstand (Personenstand) der 30- bis 49-jährigen Männer und Frauen in der Schweiz wiedergibt (Daten aus der Schweizerischen Gesundheitsbefragung 2007).

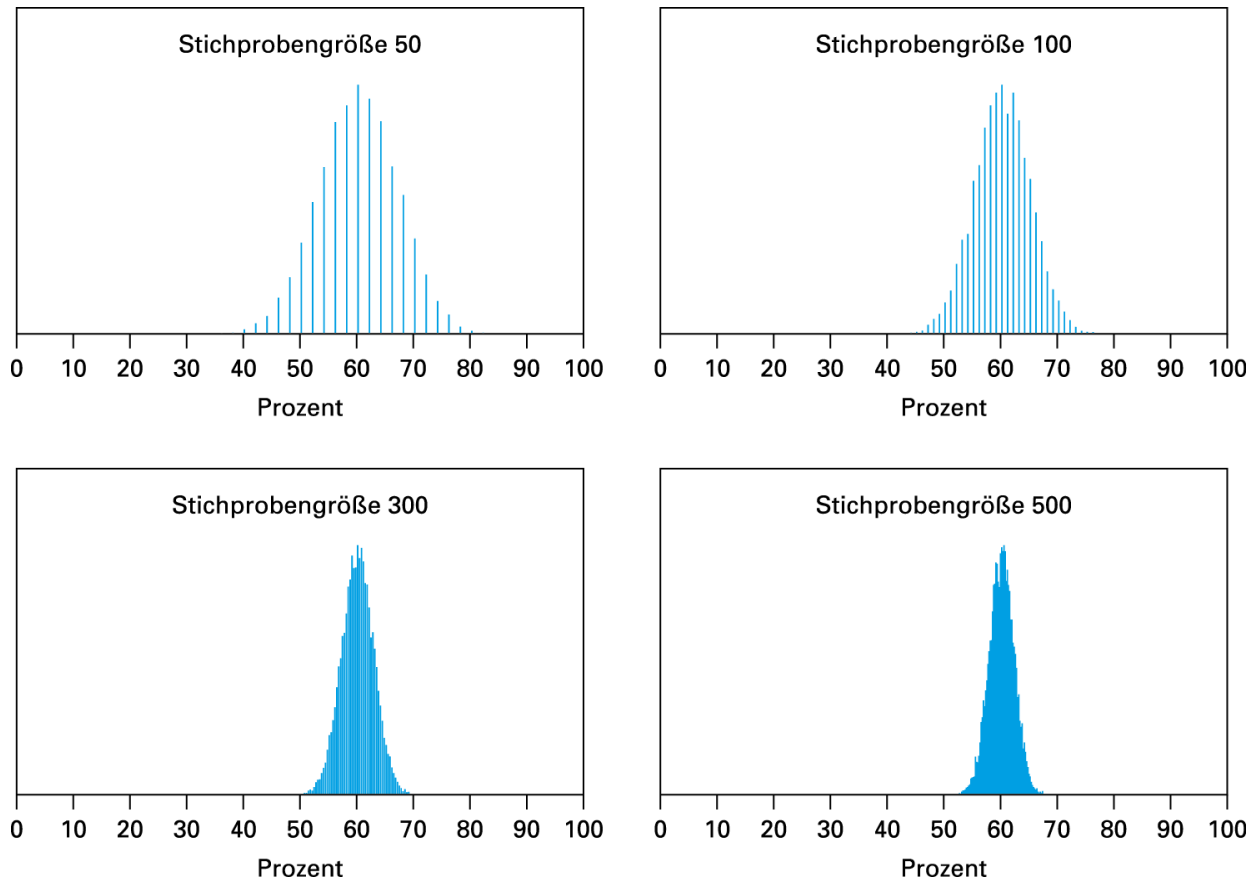

**Abb. 2.18:** Stichprobenvariabilität in Abhängigkeit von der Stichprobengröße (50, 100, 300 und 500 Personen) für den Prozentsatz an verheirateten Personen bei einem wahren Prozentsatz von 60 % in der Gesamtpopulation. Resultate von Computersimulationen mit jeweils 10.000 Stichproben.

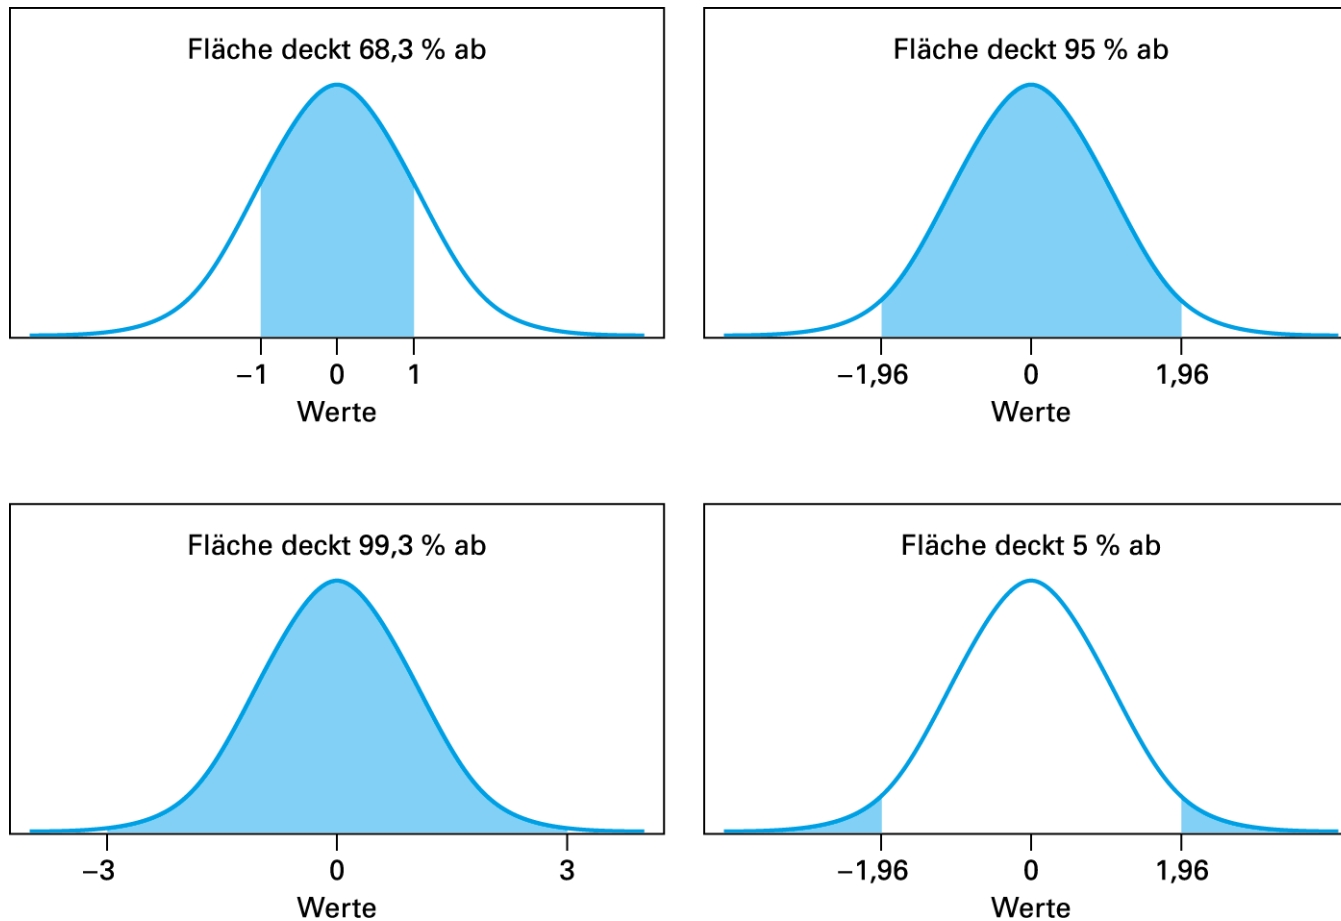

**Abb. 2.19:** Die Standard-Normalverteilung mit dem Mittelwert (MW) = 0 und der Standardabweichung (SD) = 1. Die gesamte Fläche zwischen der Linie der Dichtefunktion und der X-Achse beträgt 100 %.

**Annahmen:**

- Die Sensitivität des Tests ist 85 %
- Die Spezifität des Tests ist 97 %.
- Die Prävalenz der Krankheit beträgt 2 von 1.000 (also 20 von 10.000)

| Testresultat | Personen<br>mit der Krankheit | Personen<br>ohne die Krankheit | Gesamt |
|--------------|-------------------------------|--------------------------------|--------|
| Positiv      | 17                            | 299                            | 316    |
| Negativ      | 3                             | 9.681                          | 9.684  |
| Gesamt       | 20                            | 9.980                          | 10.000 |

- Der *positiv prädiktive Wert* des Tests beträgt  $17/316 = 5,4\%$ .
- 94,6 % der positiven Tests sind falsch positiv.
- Der *negativ prädiktive Wert* des Tests beträgt  $9.681/9.684 = 99,97\%$

**Tab. 2.8:** Interpretation der Resultate eines Tests am Beispiel eines Mammografie-Screenings bei 10.000 Frauen.

|                         | Gruppe mit<br>einmaliger<br>Sigmoidoskopie | Kontrollgruppe<br>ohne<br>Sigmoidoskopie | Relatives Risiko<br>(95 % VI) | p-Wert   |
|-------------------------|--------------------------------------------|------------------------------------------|-------------------------------|----------|
| Darmkrebs-Todesfälle    | 221                                        | 637                                      | 0,69 (0,59; 0,80)             | < 0,0001 |
| Alle Todesfälle         | 6.775                                      | 13.768                                   | 0,97 (0,95; 1,00)             | 0,052    |
| Gesamtzahl der Personen | 57.099                                     | 112.939                                  |                               |          |

95%-VI: 95%-Vertrauensintervall

Das *relative Risiko* (RR) vergleicht die Gruppe, bei deren Mitgliedern jeweils eine einmalige Sigmoidoskopie durchgeführt wurde, mit der Kontrollgruppe (s. Kap. 2.1.3).

**Tab. 2.9:** Randomisierte Studie zur Wirksamkeit einer einmaligen Sigmoidoskopie als Mittel der Darmkrebs-Früherkennung: Zahl der Todesfälle insgesamt sowie der Darmkrebs-Todesfälle in beiden Gruppen während eines Zeitraums von etwa 11 Jahren (Resultate übernommen aus Lancet 2010; 375: 1624–33, Tab. 1).

| Studie | Medika-<br>ment | Anzahl der<br>Patienten<br>pro<br>Gruppe | Differenz der<br>Mittelwerte des<br>LDL-Choleste-<br>rins (mg/dl)<br>zwischen der<br>Medikamenten-<br>Gruppe und der<br>Placebo-Gruppe | Standard-<br>fehler für die<br>Differenz der<br>Mittelwerte<br>des LDL-<br>Cholesterins | Grenzen des<br>95%-Vertrauensin-<br>tervalls für die<br>Differenz der<br>Mittelwerte des<br>LDL-Cholesterins | Z-Wert | p-Wert |
|--------|-----------------|------------------------------------------|----------------------------------------------------------------------------------------------------------------------------------------|-----------------------------------------------------------------------------------------|--------------------------------------------------------------------------------------------------------------|--------|--------|
| 1      | A               | 40                                       | -20                                                                                                                                    | 33                                                                                      | -84,68 bis 44,68                                                                                             | -0,606 | 0,544  |
| 2      | B               | 4.000                                    | -2                                                                                                                                     | 3,3                                                                                     | -8,47 bis 4,47                                                                                               | -0,606 | 0,544  |
| 3      | C               | 5.000                                    | -5                                                                                                                                     | 2                                                                                       | -8,92 bis -1,08                                                                                              | -2,5   | 0,012  |

**Tab. 2.10:** Hypothetische Resultate von drei placebokontrollierten, randomisierten Studien zur Senkung des LDL-Cholesterins im Blut.

|        | CMA                                                    | CEA                                                                                | CUA                                      | CBA                          |
|--------|--------------------------------------------------------|------------------------------------------------------------------------------------|------------------------------------------|------------------------------|
|        | Cost-Minimization-Analysis                             | Cost-Effectiveness-Analysis                                                        | Cost-Utility-Analysis                    | Cost-Benefit-Analysis        |
|        | Kosten-Minimierungs-Analyse                            | Kosten-Effektivitäts-Analyse                                                       | Kosten-Nutzwert-Analyse                  | Kosten-Nutzen-Analyse        |
| Kosten | Monetäre Einheiten (z. B. €)                           | Monetäre Einheiten (z. B. €)                                                       | Monetäre Einheiten (z. B. €)             | Monetäre Einheiten (z. B. €) |
| Nutzen | Wird als identisch angenommen und nicht berücksichtigt | Natürliche Einheiten (z. B. Senkung des Blutdrucks in mm Hg; beschwerdefreie Tage) | Qualitätsadjustierte Lebensjahre (QALYs) | Monetäre Einheiten (z. B. €) |

**Tab. 2.11:** Merkmale der verschiedenen gesundheitsökonomischen Studien.

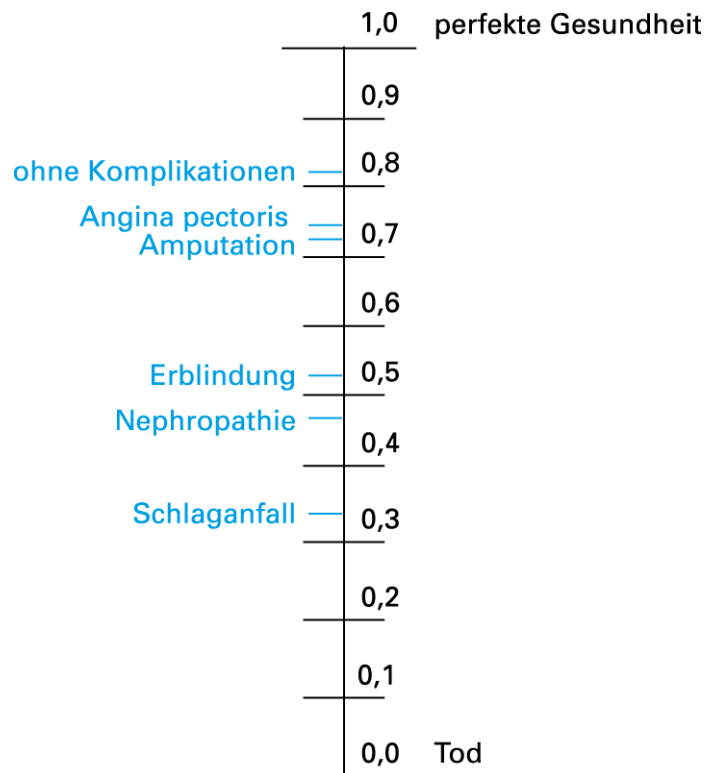

**Abb. 2.20:** Exemplarische Nutzwerte für verschiedene Komplikationen des Diabetes mellitus Typ 1; Abbildung basiert auf: Lee JM, Rhee K, O'grady MJ et al. Health Utilities for Children and Adults with Type 1 Diabetes. Medical Care 2011; 49 (10): 924–931.



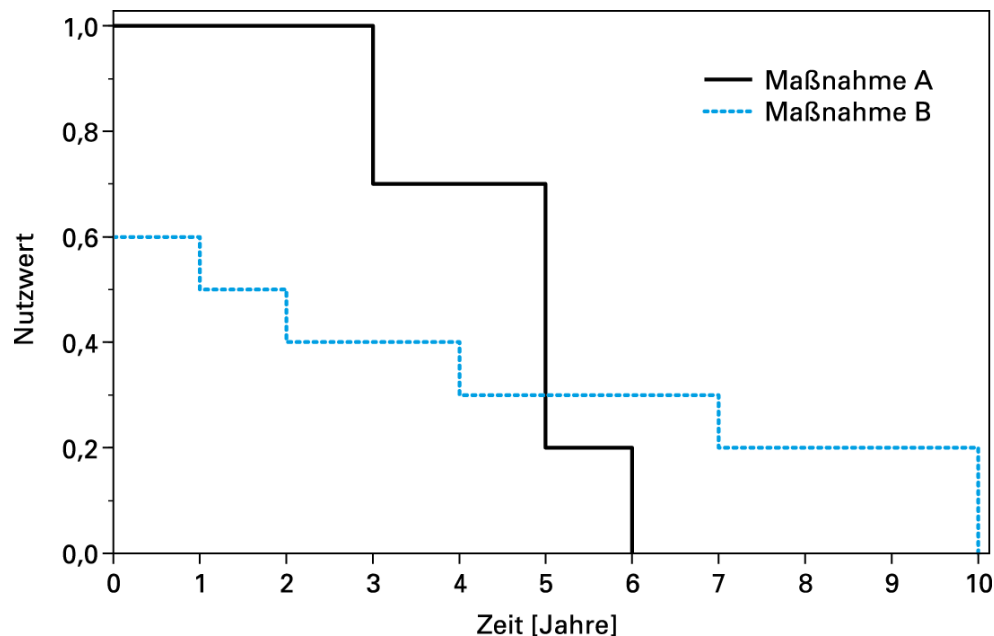

**Abb. 2.21:** Vergleich des Nutzens zweier hypothetischer Maßnahmen durch Berechnung von QALYs im Rahmen einer CUA.

Bei Maßnahme A werden 4,6 QALYs angehäuft, bei Maßnahme B sind es 3,4 QALYs. Die Maßnahmen A und B verursachen Kosten in Höhe von 68.000 € bzw. 55.000 €. Damit liegen die Kosten/QALY-Quotienten bei 14.783 €/QALY für Maßnahme A und 16.176 €/QALY für Maßnahme B. Obwohl also die Patienten bei Maßnahme A kürzer leben und die Behandlung teurer ist, häufen sie mehr QALYs an und das Kosten/QALY-Verhältnis ist günstiger.

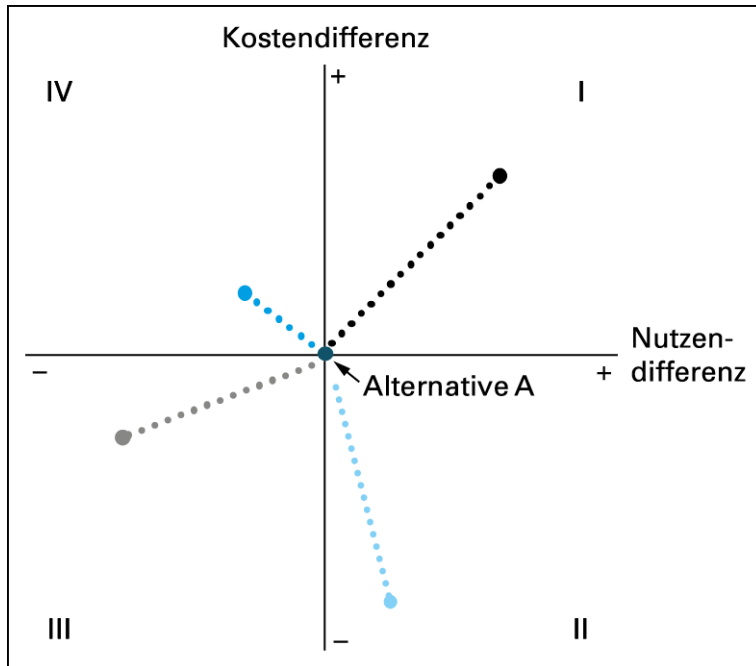

**Abb. 2.22:** Die Ergebnisse einer gesundheitsökonomischen Evaluationsstudie lassen sich auf einer Kosten-Effektivitäts-Fläche auftragen. Die untersuchten Maßnahmen werden im Vergleich zu einer Alternative A (im Zentrum; häufig der *Status Quo*) hinsichtlich der zusätzlich aufzuwendenden Kosten und des zu erwartenden zusätzlichen Nutzens eingetragen.

| Land           | Organisation der Finanzierung                          | Selbstbeteiligung an den Kosten | Organisation der Leistungserbringung                      | Rang* |
|----------------|--------------------------------------------------------|---------------------------------|-----------------------------------------------------------|-------|
| Frankreich     | Sozialversicherung                                     | Mittel                          | Ambulant privat; stationär überwiegend öffentlich         | 1     |
| Italien        | Nationaler Gesundheitsdienst                           | Hoch                            | Überwiegend privat                                        | 2     |
| Spanien        | Nationaler Gesundheitsdienst mit Beitragsfinanzierung  | Mittel                          | Überwiegend öffentlich                                    | 7     |
| Niederlande    | Obligatorische Versicherung mit Kopfpauschale          | Gering                          | Überwiegend privat                                        | 17    |
| Großbritannien | Nationaler Gesundheitsdienst                           | Gering                          | Überwiegend öffentlich                                    | 18    |
| Schweiz        | Obligatorische Versicherung mit Kopfpauschale          | Hoch                            | Ambulant privat; stationär teils öffentlich, teils privat | 20    |
| Belgien        | Sozialversicherung                                     | Hoch                            | Ambulant privat; stationär teils öffentlich, teils privat | 21    |
| Schweden       | Nationaler Gesundheitsdienst                           | Gering                          | Überwiegend öffentlich                                    | 23    |
| Deutschland    | Sozialversicherung                                     | Mittel                          | Ambulant privat; stationär teils öffentlich, teils privat | 25    |
| USA            | Freiwillige Privatversicherung und staatliche Fürsorge | Hoch                            | Überwiegend privat                                        | 37    |

\* Bewertung von Wirtschaftlichkeit und Qualität des Gesundheitssystems laut Weltgesundheitsorganisation WHO (*WHO World Health Report 2000. Health Systems: Improving Performance*)

**Tab. 3.1:** Ausgewählte Merkmale der Gesundheitssysteme verschiedener europäischer Länder und der USA mit einer Bewertung durch die Weltgesundheitsorganisation WHO.

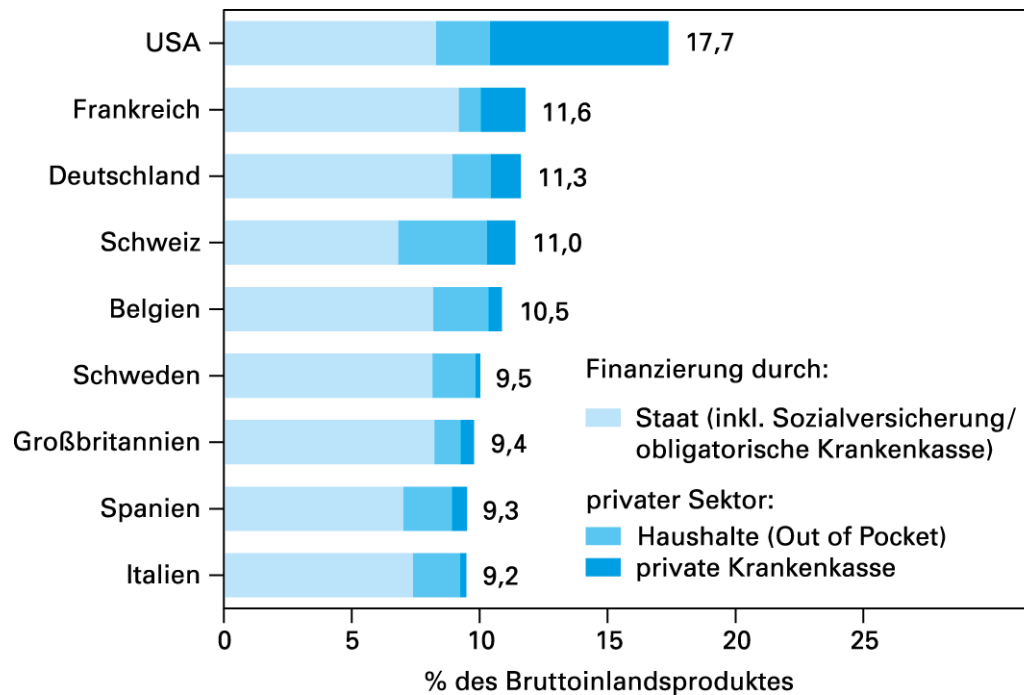

**Abb. 3.1:** Gesundheitsausgaben in verschiedenen europäischen Ländern und den USA, gemessen am Bruttoinlandsprodukt und unterschieden nach Finanzierungsträgern (2011) (Quelle: OECD Health Data 2013 online database. <http://www.oecd.org/health/health-systems/oecdhealthdata.htm>).

**Tab. 3.2:** Ausgewählte Merkmale der schweizerischen obligatorischen Krankenpflegeversicherung (OKP).

#### Versicherungspflicht

- Jede Person mit Wohnsitz in der Schweiz muss sich innerhalb von 3 Monaten bei einem Versicherer ihrer Wahl versichern.
- ArbeitnehmerInnen können auf die Unfalldeckung verzichten, wenn sie am Arbeitsplatz gegen Unfall versichert sind.

#### Auflagen an Versicherer

- Die Versicherer nehmen alle Versicherungswilligen in die OKP und die freiwillige Taggeldversicherung auf. Ein Gewinn ist nicht gestattet.
- Sie beteiligen sich am Risikoausgleich zwischen den Versicherern. Dieser beruht auf Alter und Geschlecht der Versicherten sowie einem Aufenthalt im Spital oder Pflegeheim im Vorjahr.
- Sie können innerhalb der OKP-Prämienrabatte aufgrund höherer Franchisen (bis max. 2.500 CHF, s. Fußnote 13) oder eingeschränkter Wahlmöglichkeiten (HMO oder Hausarztmodelle, s. Web-Box 3.2.1 auf unserer Homepage) anbieten.
- Sie können freiwillige Zusatzversicherungen mit Gewinnorientierung anbieten, wobei Versicherungswillige abgelehnt oder Vorbehalte angebracht werden dürfen.
- Sie sind verpflichtet, Maßnahmen zu unterstützen, die der Krankheitsverhütung dienen. Zu diesem Zweck betreiben sie gemeinsam mit den Kantonen die Institution ‚Gesundheitsförderung Schweiz‘.

#### Prämien

- Die Versicherer legen die Höhe der Prämien fest. Diese müssen dann vom Bundesamt für Gesundheit (BAG) genehmigt werden. Für Kinder (bis 18 Jahre) muss der Versicherer eine niedrigere Prämie ansetzen. Er kann die Prämien kantonal oder regional nach den Kostenunterschieden abstimmen. Innerhalb der drei Altersgruppen (Kinder, junge Erwachsene bis 25 Jahre, Erwachsene) sind die Prämien risiko- und einkommensunabhängig.
- Die Höhe der Prämien unterscheidet sich zwischen den Kantonen z.T. erheblich: Erwachsene bezahlten 2012 im Kanton Basel-Stadt z.B. durchschnittlich 500 CHF monatlich (inkl. Unfallversicherung), im Kanton Nidwalden dagegen nur 292 CHF.
- Prämienverbilligungen für wirtschaftlich Schwächere (das sind etwa 30% der Versicherten) werden durch Bund und Kantone finanziert.

#### Identischer Katalog von Leistungen

- Leistungen, die der Diagnosestellung oder der Behandlung einer Krankheit und ihrer Folgen dienen:
  - Untersuchungen und Behandlungen durch ÄrztInnen, ChiropraktorInnen oder Personen, die auf ärztliche Anordnung tätig werden
  - Pflegeleistungen zu Hause, im Spital und im Pflegeheim. Aufenthalt im Spital und im Geburtshaus
  - Arzneimittel, Analysen sowie Mittel und Gegenstände aufgrund der Spezialitätenliste (SL), der Analysen Liste (AL) und der Liste der Mittel und Gegenstände (MiGEL).
- Ausgewählte präventive Maßnahmen: Impfungen, acht Untersuchungen im Vorschulalter, bei Frauen ein Cervix-Abstrich alle drei Jahre, Mammografie im Rahmen von Screening-Programmen.
- Zahnärztliche Leistungen werden nur in Ausnahmefällen übernommen.

#### Bedingungen für Kostenübernahme

- Die Maßnahmen sind wirksam, zweckmäßig und wirtschaftlich. Sie erfolgen auf ärztliche Verordnung und mit detaillierter Rechnungsstellung nach dem betreffenden Tarif (z.B. TARMED).

#### Kostenbeteiligung

- Die Versicherten beteiligen sich an den Kosten in Form einer Franchise und eines Selbstbehalts.
- Die Franchise beträgt für Erwachsene 300 CHF pro Kalenderjahr. Für Kinder wird keine Franchise erhoben.
- Der Selbstbehalt beträgt 10% der die Franchise übersteigenden Kosten bis zu einem Maximalbetrag von jährlich 700 CHF (Erwachsene) oder 350 CHF (Kinder).

**Tab. 3.3:** Auswahl von wichtigen Aufgaben und Kompetenzen von Bund, Kantonen und Gemeinden im schweizerischen Gesundheitssystem.

|                                                                                                                                                                                                                                                                                                                                                                                                                                                                                                                                                                                                                                                                                                                                                                                                                                                                                                                                                                                                                                                                                                                                                                                                                                                                                                                                                                                                                                                                                                                                                                                                                                                                                                                                                                                                                                                                                           |                                                                                                                                                                                                                                                                                                                                                                                                                                                                                                                                                                                                                                                                                                                                                                                                                                                                                                                                                                                                                                                                                                                                                                                                                                                                                                                                                                                                                                                                                                                                                                                                                                                                                                                                                                                                                                           |
|-------------------------------------------------------------------------------------------------------------------------------------------------------------------------------------------------------------------------------------------------------------------------------------------------------------------------------------------------------------------------------------------------------------------------------------------------------------------------------------------------------------------------------------------------------------------------------------------------------------------------------------------------------------------------------------------------------------------------------------------------------------------------------------------------------------------------------------------------------------------------------------------------------------------------------------------------------------------------------------------------------------------------------------------------------------------------------------------------------------------------------------------------------------------------------------------------------------------------------------------------------------------------------------------------------------------------------------------------------------------------------------------------------------------------------------------------------------------------------------------------------------------------------------------------------------------------------------------------------------------------------------------------------------------------------------------------------------------------------------------------------------------------------------------------------------------------------------------------------------------------------------------|-------------------------------------------------------------------------------------------------------------------------------------------------------------------------------------------------------------------------------------------------------------------------------------------------------------------------------------------------------------------------------------------------------------------------------------------------------------------------------------------------------------------------------------------------------------------------------------------------------------------------------------------------------------------------------------------------------------------------------------------------------------------------------------------------------------------------------------------------------------------------------------------------------------------------------------------------------------------------------------------------------------------------------------------------------------------------------------------------------------------------------------------------------------------------------------------------------------------------------------------------------------------------------------------------------------------------------------------------------------------------------------------------------------------------------------------------------------------------------------------------------------------------------------------------------------------------------------------------------------------------------------------------------------------------------------------------------------------------------------------------------------------------------------------------------------------------------------------|
| <p><b>Bund</b></p> <p><i>Sozial- und Privatversicherungen</i></p> <ul style="list-style-type: none"> <li>• Obligatorische Krankenversicherung, Mutterschafts-, Unfall-, Invaliden-, und Militärversicherung</li> <li>• Freiwillige Taggeldversicherung</li> <li>• Freiwillige Zusatzversicherungen</li> </ul> <p><i>Gesundheitsschutz und Überwachung</i></p> <ul style="list-style-type: none"> <li>• Übertragbare Krankheiten</li> <li>• Betäubungsmittel, Chemikalien, Giftstoffe</li> <li>• Lebensmittel</li> <li>• Radioaktive Strahlung</li> <li>• Forschung am Menschen</li> </ul> <p><i>Medikamente, Impfstoffe, Blutprodukte</i></p> <ul style="list-style-type: none"> <li>• Zulassung und Kontrolle</li> </ul> <p><i>Bildung und Forschung</i></p> <ul style="list-style-type: none"> <li>• Prüfungen in den universitären Medizinalfächern, Diplomanerkennung</li> <li>• Aus- und Weiterbildung der nicht-universitären Gesundheitsberufe</li> <li>• Förderung und Koordination der Forschung</li> </ul> <p><i>Prävention und Gesundheitsförderung</i></p> <ul style="list-style-type: none"> <li>• Suchtbekämpfung (z.B. Tabak, Alkohol, Drogen)</li> <li>• Migration und Gesundheit</li> <li>• Psychische Gesundheit</li> <li>• Gender Health</li> </ul> <p><i>Alkohol und Tabak</i></p> <ul style="list-style-type: none"> <li>• Kontrolle von Herstellung, Einfuhr und Verkauf von Alkohol</li> <li>• Steuern auf Alkohol und Tabak</li> </ul> <p><i>Arbeitssicherheit</i></p> <ul style="list-style-type: none"> <li>• Verhütung von Unfällen und Berufskrankheiten</li> <li>• Sicherheit von Einrichtungen und Geräten</li> </ul> <p><i>Statistik</i></p> <ul style="list-style-type: none"> <li>• Gesundheitsstatistiken</li> <li>• Gesundheitsobservatorium Obsan (mit Kantonen)</li> </ul> <p><i>Fortpflanzungs- und Transplantationsmedizin, Gentechnologie</i></p> | <p><i>Patientenrechte, Persönlichkeitsschutz, Datenschutz</i></p> <p><i>Nationale Gesundheitspolitik Schweiz</i><br/>(mit Gesundheitsdirektorenkonferenz SGK)</p> <p><b>Kantone</b></p> <p><i>Gesundheitsversorgung</i></p> <ul style="list-style-type: none"> <li>• Sicherstellungsauftrag</li> <li>• Kantonale Krankenhäuser und Pflegeheime</li> <li>• Spitex, schulärztliche und sozialpsychiatrische Dienste</li> <li>• Notfall-, Rettungs-, und Katastrophendienste</li> </ul> <p><i>Bildung und Aufsicht</i></p> <ul style="list-style-type: none"> <li>• Medizinische Fakultäten der Universitäten, höhere Fachschulen, Fachhochschulen</li> <li>• Berufszulassungen und Praxisbewilligungen für ÄrztInnen, ZahnärztInnen, ApothekerInnen, Hebammen</li> </ul> <p><i>Finanzierung</i></p> <ul style="list-style-type: none"> <li>• Subvention von Einrichtungen (z.B. von Privatspitälern)</li> <li>• Prämienverbilligung für wirtschaftlich schwächere Versicherte</li> <li>• Sozialhilfe</li> </ul> <p><i>Gesundheitsschutz</i></p> <ul style="list-style-type: none"> <li>• Umsetzung von Bundesrecht: Lebensmittel- und Giftkontrolle, Strahlenschutz, Arbeitssicherheit etc.</li> </ul> <p><i>Prävention und Gesundheitsförderung</i></p> <ul style="list-style-type: none"> <li>• Stiftung „Gesundheitsförderung Schweiz“ (mit Krankenversicherern)</li> </ul> <p><b>Gemeinden</b></p> <p><i>Gesundheitsversorgung und Sozialwesen</i></p> <ul style="list-style-type: none"> <li>• Gemeindekrankenhäuser, Pflege- und Altersheime, Spitex, Gemeindepsychiatrie, schulmedizinische Dienste, Sozialhilfe etc., oft gemeinsam mit anderen Gemeinden oder delegiert an private Vereine.</li> </ul> <p><i>Prävention und Gesundheitsförderung</i></p> <ul style="list-style-type: none"> <li>• mit Bund und Kantonen</li> </ul> |
|-------------------------------------------------------------------------------------------------------------------------------------------------------------------------------------------------------------------------------------------------------------------------------------------------------------------------------------------------------------------------------------------------------------------------------------------------------------------------------------------------------------------------------------------------------------------------------------------------------------------------------------------------------------------------------------------------------------------------------------------------------------------------------------------------------------------------------------------------------------------------------------------------------------------------------------------------------------------------------------------------------------------------------------------------------------------------------------------------------------------------------------------------------------------------------------------------------------------------------------------------------------------------------------------------------------------------------------------------------------------------------------------------------------------------------------------------------------------------------------------------------------------------------------------------------------------------------------------------------------------------------------------------------------------------------------------------------------------------------------------------------------------------------------------------------------------------------------------------------------------------------------------|-------------------------------------------------------------------------------------------------------------------------------------------------------------------------------------------------------------------------------------------------------------------------------------------------------------------------------------------------------------------------------------------------------------------------------------------------------------------------------------------------------------------------------------------------------------------------------------------------------------------------------------------------------------------------------------------------------------------------------------------------------------------------------------------------------------------------------------------------------------------------------------------------------------------------------------------------------------------------------------------------------------------------------------------------------------------------------------------------------------------------------------------------------------------------------------------------------------------------------------------------------------------------------------------------------------------------------------------------------------------------------------------------------------------------------------------------------------------------------------------------------------------------------------------------------------------------------------------------------------------------------------------------------------------------------------------------------------------------------------------------------------------------------------------------------------------------------------------|

(Quelle: modifiziert nach G. Kocher, W. Oggier. Gesundheitswesen Schweiz 2010–2012. Verlag Hans Huber, Bern, 2010)

**Tab. 3.4:** Kosten des schweizerischen Gesundheitswesens, gegliedert nach Leistungserbringern, Art der Leistungen und Finanzierung (2011).

|                                                                      |                 |          |
|----------------------------------------------------------------------|-----------------|----------|
| <b>Indikatoren der Gesundheitskosten</b>                             |                 |          |
| Kosten des Gesundheitswesens in % des BIP                            | 11,0%           |          |
| Gesundheitsausgaben pro Einwohner und Monat in CHF                   | 680             |          |
| Kosten des Gesundheitswesens in Mrd. CHF                             | 64.633          |          |
| <b>Kostenaufteilung nach Leistungserbringern</b>                     | <b>Mio. CHF</b> | <b>%</b> |
| Krankenhäuser                                                        | 23.256          | 36,0%    |
| Ambulante Versorger <sup>1</sup>                                     | 19.927          | 30,8%    |
| Pflegeheime und andere sozialmedizinische Institutionen <sup>2</sup> | 11.311          | 17,5%    |
| Verwaltung und Prävention <sup>2</sup>                               | 3.939           | 6,1%     |
| Übrige <sup>3</sup>                                                  | 6.200           | 9,6%     |
| <b>Finanzierung (Direktzahlende)</b>                                 |                 |          |
| OKP und andere Sozialversicherungen                                  | 26.755          | 41,4%    |
| Private Haushalte <sup>4</sup>                                       | 17.159          | 26,5%    |
| Staat                                                                | 12.244          | 18,9%    |
| Privatversicherungen                                                 | 5.536           | 8,6%     |
| Übrige <sup>5</sup>                                                  | 2.939           | 4,6%     |
| <b>Finanzierung (Quellen)</b>                                        |                 |          |
| Private Haushalte                                                    | 39.792          | 61,6%    |
| Kantone                                                              | 14.027          | 21,7%    |
| Unternehmen                                                          | 4.310           | 6,6%     |
| Bund                                                                 | 3.858           | 6,0%     |
| Gemeinden                                                            | 2.645           | 4,1%     |

BIP = Bruttoinlandsprodukt; OKP= obligatorische Krankenpflegeversicherung

1 ÄrztInnen, ZahnärztInnen, Spitex

2 Staat und Versicherer

3 Detailhandel, gemeinnützige Organisationen

4 Out of Pocket und Kostenbeteiligung OKP (Franchisen und Selbstbehalt)

5 Ergänzungsleistungen AHV/IV, kantonale Alters- und Pflegehilfe

Quelle: Statistik der Kosten und der Finanzierung des Gesundheitswesens. Bundesamt für Statistik (Stand: September 2013)

**Tab. 3.5:** Entwicklung der Gesundheitsausgaben in Deutschland in den Jahren zwischen 1992 und 2010 (Ausgabenbeträge in Mio. Euro).

|                                                    | 1992    | 1995    | 2000    | 2005    | 2010    | Differenz zwischen<br>1992 und 2010 |       |
|----------------------------------------------------|---------|---------|---------|---------|---------|-------------------------------------|-------|
|                                                    |         |         |         |         |         | in Mio. €                           | in %  |
| <b>Ausgaben insgesamt</b>                          | 157.584 | 186.474 | 212.335 | 239.361 | 287.293 | 129.709                             | 82,3  |
| In % des Brutto-<br>inlandsprodukts                | 9,6     | 10,1    | 10,3    | 10,7    | 11,6    |                                     |       |
| davon                                              |         |         |         |         |         |                                     |       |
| <b>Öffentliche Haushalte</b>                       | 17.627  | 19.917  | 13.613  | 13.583  | 13.829  | –3.798                              | –21,5 |
| In % der Ausgaben<br>insgesamt                     | 11,2    | 10,7    | 6,4     | 5,7     | 4,8     |                                     |       |
| <b>Sozialversicherung</b>                          | 105.121 | 125.609 | 147.808 | 161.411 | 195.750 | 90.629                              | 86,2  |
| In % der Ausgaben<br>insgesamt                     | 66,7    | 67,4    | 69,6    | 67,4    | 68,1    |                                     |       |
| davon                                              |         |         |         |         |         |                                     |       |
| • Gesetzliche Kranken-<br>versicherung             | 98.718  | 112.474 | 123.914 | 135.877 | 165.548 | 66.830                              | 67,7  |
| In % der Ausgaben<br>insgesamt                     | 62,6    | 60,3    | 58,4    | 56,8    | 57,6    |                                     |       |
| • Soziale Pflegever-<br>sicherung                  | –       | 5.292   | 16.697  | 17.888  | 21.535  | –                                   | –     |
| In % der Ausgaben<br>insgesamt                     |         | 2,8     | 7,9     | 7,5     | 7,5     |                                     |       |
| • Gesetzliche Renten-<br>versicherung              | 3.500   | 4.370   | 3.500   | 3.582   | 4.054   | 584                                 | 16,7  |
| In % der Ausgaben<br>insgesamt                     | 2,2     | 2,3     | 1,6     | 1,5     | 1,4     |                                     |       |
| • Gesetzliche Unfall-<br>versicherung              | 2.838   | 3.408   | 3.629   | 3.998   | 4.613   | 1.775                               | 62,5  |
| In % der Ausgaben<br>insgesamt                     | 1,8     | 1,8     | 1,7     | 1,7     | 1,6     |                                     |       |
| <b>Private Kranken- und<br/>Pflegeversicherung</b> | 11.679  | 14.275  | 17.604  | 22.023  | 26.773  | 15.094                              | 129,2 |
| In % der Ausgaben<br>insgesamt                     | 7,4     | 7,7     | 8,3     | 9,2     | 9,3     |                                     |       |
| <b>Arbeitgeber</b>                                 | 6.930   | 7.772   | 8.677   | 10.143  | 11.975  | 5.045                               | 72,8  |
| In % der Ausgaben<br>insgesamt                     | 4,4     | 4,2     | 4,1     | 4,2     | 4,2     |                                     |       |
| <b>Private Haushalte u.<br/>Organisationen</b>     | 16.293  | 18.965  | 24.701  | 32.251  | 38.965  | 22.672                              | 139,2 |
| In % der Ausgaben<br>insgesamt                     | 10,3    | 10,2    | 11,6    | 13,5    | 13,6    |                                     |       |

Quelle: Statistisches Bundesamt; eigene Berechnungen



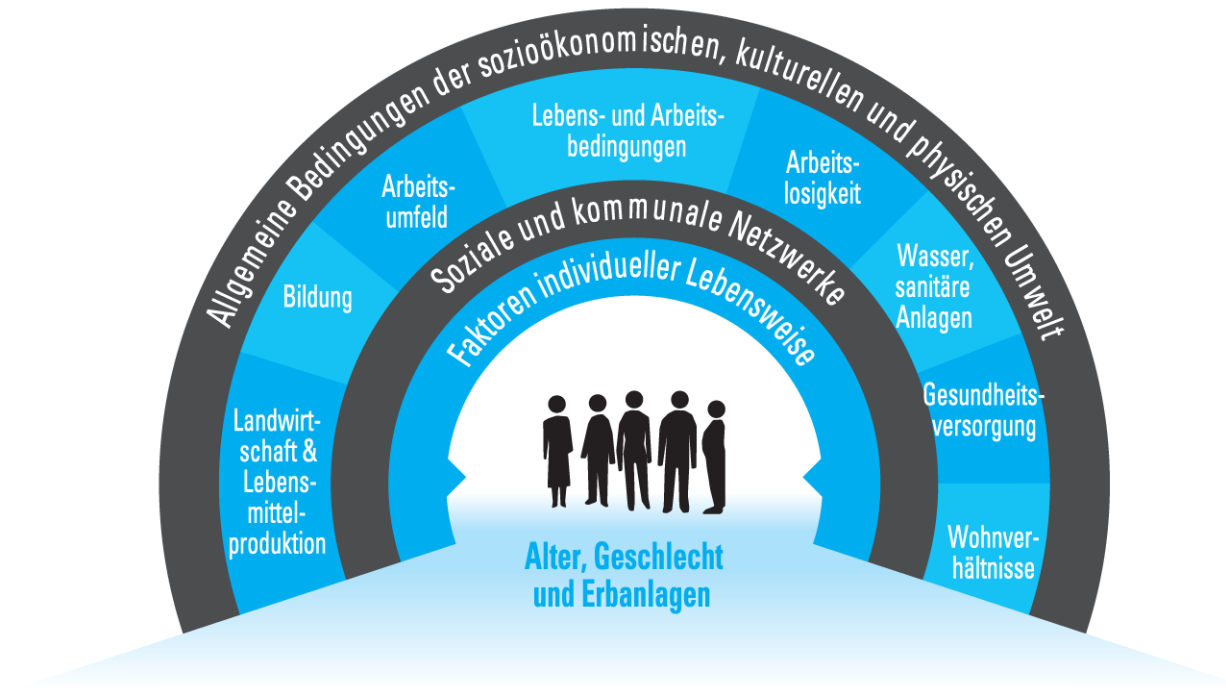

**Abb. 4.1:** Die wichtigsten Gesundheitsdeterminanten als Basis für Krankheitsprävention und Gesundheitsförderung (Zeichnung: Christoph Frei, nach dem Modell von Dahlgren und Whitehead, 1991).

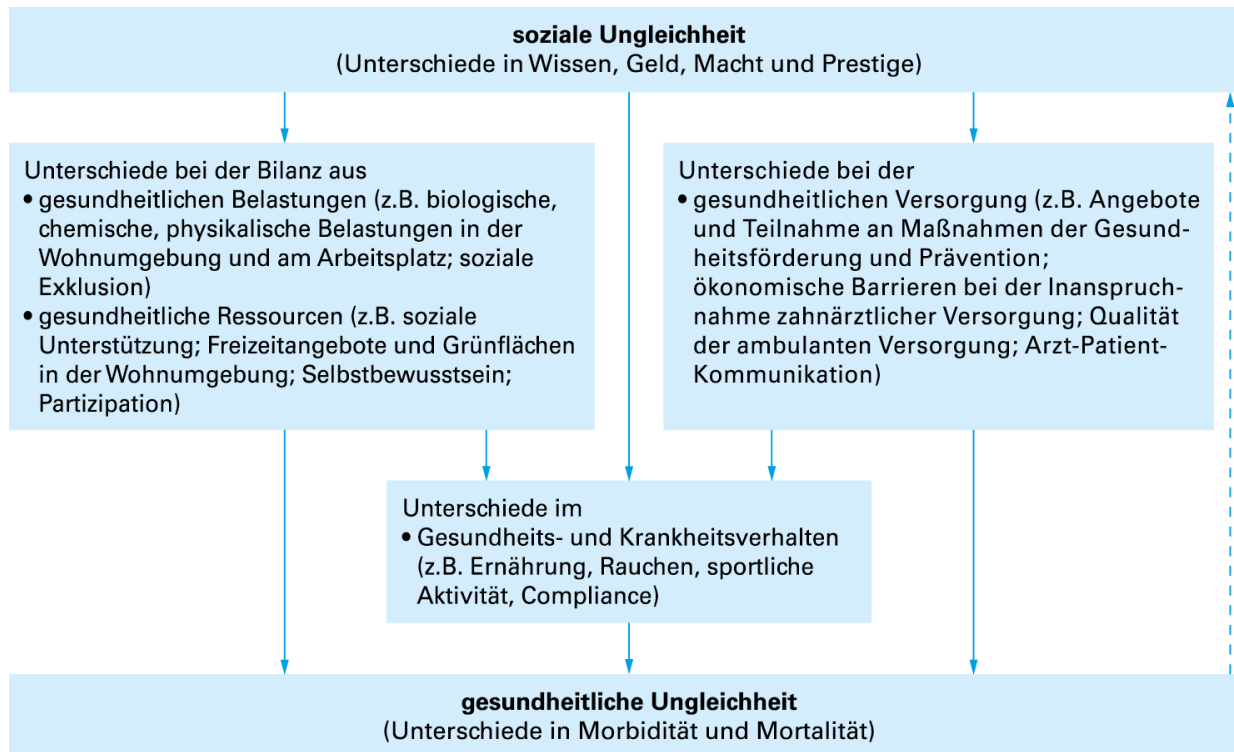

**Abb. 4.2:** Modell zur Erklärung der Entwicklung von gesundheitlicher Ungleichheit aus sozialer Ungleichheit.  
(Quelle: modifiziert nach Mielck 2011, auf der Basis von Elkeles/Mielck 1997).

| Theorie      | Primärer Ansatzpunkt                    | Interventionsform    | Ziel                                                               |
|--------------|-----------------------------------------|----------------------|--------------------------------------------------------------------|
| Pathogenese  | Erkrankungsrisiken senken               | Prävention           | Gesundheit und Lebensqualität der Bevölkerung erhalten und erhöhen |
| Salutogenese | Gesundheitsrelevante Ressourcen stärken | Gesundheitsförderung |                                                                    |

**Tab. 4.1:** Unterschiedliche theoretische Grundlagen und unterschiedliche Ansatzpunkte führen bei Primärprävention und Gesundheitsförderung zum gleichen Ziel.

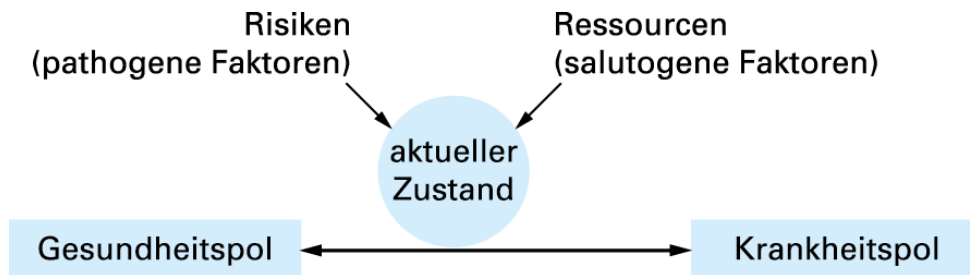

**Abb. 4.3:** Wechselbeziehung zwischen Salutogenese und Pathogenese. Die Abbildung stellt das Kontinuum zwischen den Polen *Gesundheit* und *Krankheit* als kontinuierlichen, dynamischen Prozess dar, der ständig durch eine Vielzahl von Belastungsfaktoren und Ressourcen beeinflusst wird.

|                                  | Nutzen                                                                         | Kosten                                                          |
|----------------------------------|--------------------------------------------------------------------------------|-----------------------------------------------------------------|
| <b>Bedrohungseinschätzung:</b>   | „Rauchen hilft mir, mit dem Stress besser fertig zu werden.“                   | „Wie gefährdet bin ich, an Lungenkrebs zu erkranken?“           |
| <b>Bewältigungseinschätzung:</b> |                                                                                |                                                                 |
| • Handlungswirksamkeit           | „Wenn ich mit dem Rauchen aufhöre, kann ich dann mein Krebsrisiko verringern?“ | „Wie anstrengend wäre es für mich, mit dem Rauchen aufzuhören?“ |
| • Selbstwirksamkeit              | „Würde ich es überhaupt schaffen, mit dem Rauchen aufzuhören?“                 |                                                                 |

**Tab. 4.2:** Erläuterung der **Theorie der Schutzmotivation** am Beispiel von Warnhinweisen auf Zigarettenpackungen.

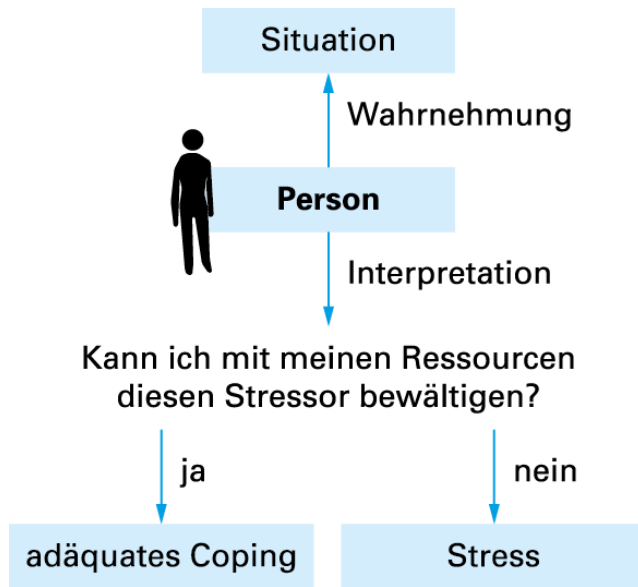

**Abb. 4.4:** Stark vereinfachtes Modell der transaktionalen Stressreaktion (Zeichnung: Christoph Frei).

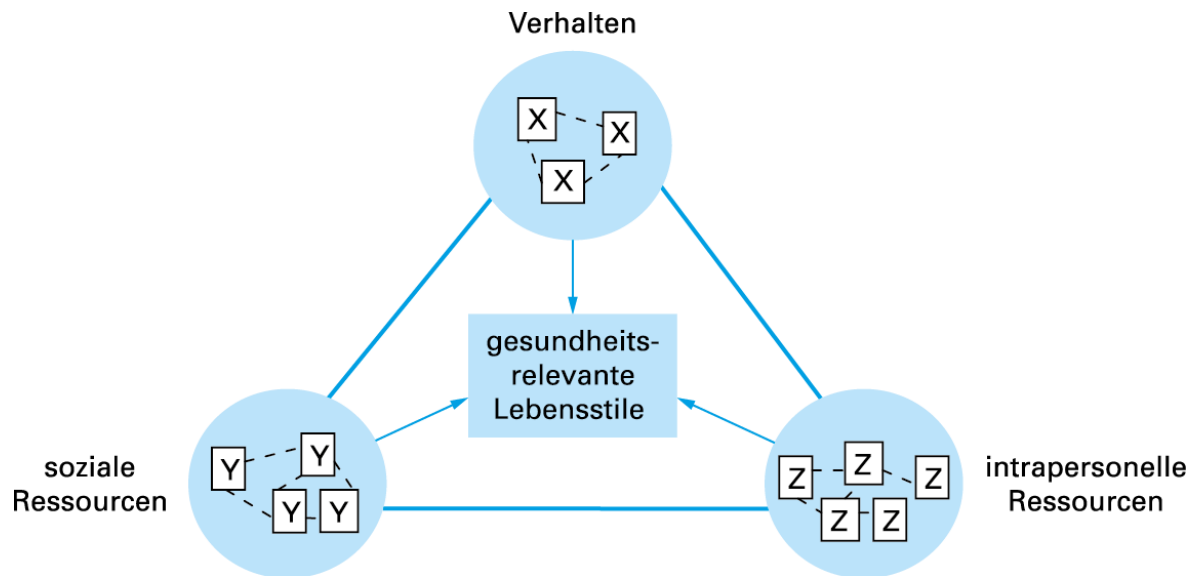

**Abb. 4.5:** Die drei Bereiche *Verhalten*, *intrapersonelle* und *soziale Ressourcen* sind konstituierende Dimension des Lebensstils. Sie stehen miteinander in Wechselwirkung und bilden sowohl in sich als auch untereinander ein aufeinander abgestimmtes, dynamisches Muster.

X: Verhaltensweisen wie z. B. Rauchen, körperliche Aktivität etc.

Y: Soziale Ressourcen wie z. B. gemeinschaftliche Unterstützung, Quartierangebote etc.

Z: Intrapersonelle Ressourcen wie z. B. Einstellungen, Gesundheitskompetenz etc.

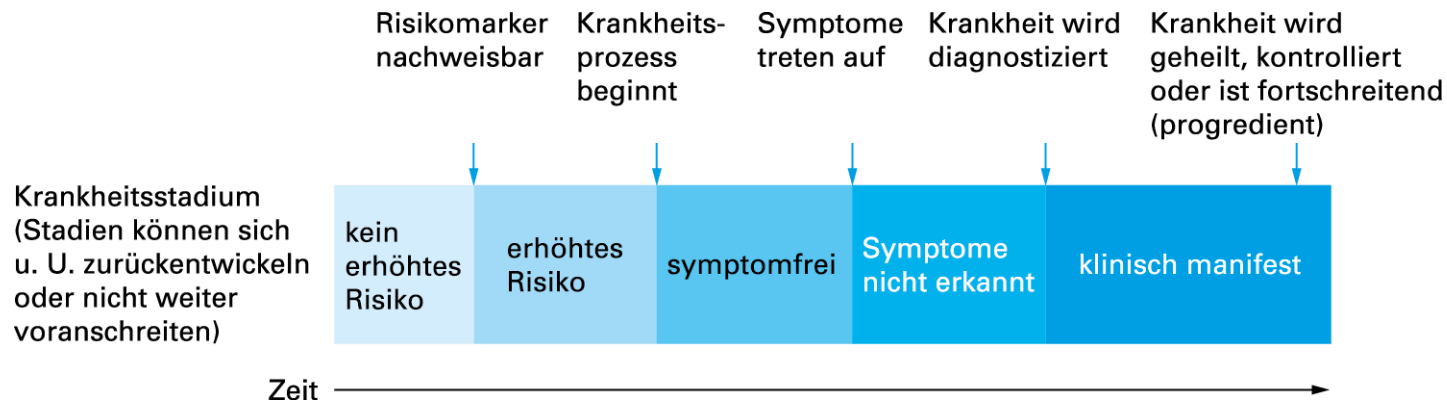

**Abb. 4.6:** Die verschiedenen Stadien auf dem Weg zu einer klinisch manifesten Erkrankung (Quelle: modifiziert nach Raffle A, Gray JAM. Screening. Verlag Hans Huber, 2009).



**Abb. 4.7:** oben: Flussdiagramm des Screening-Prozesses. Die vom Screening nicht erfassten Fälle und Fälle mit unklaren Resultaten sind Teil der Screening-Realität; unten: Mögliche Therapieergebnisse bei PatientInnen mit pathologischen Befunden, die durch ein Screening entdeckt wurden. Von Nutzen ist das Screening nur für die PatientInnen in der ersten Gruppe. Für die PatientInnen der vierten Gruppe war die Therapie unnötig. In allen Gruppen besteht das Risiko von Komplikationen und Nebenwirkungen (Quelle: modifiziert nach Raffle A, Gray JAM. Screening. Verlag Hans Huber, 2009).

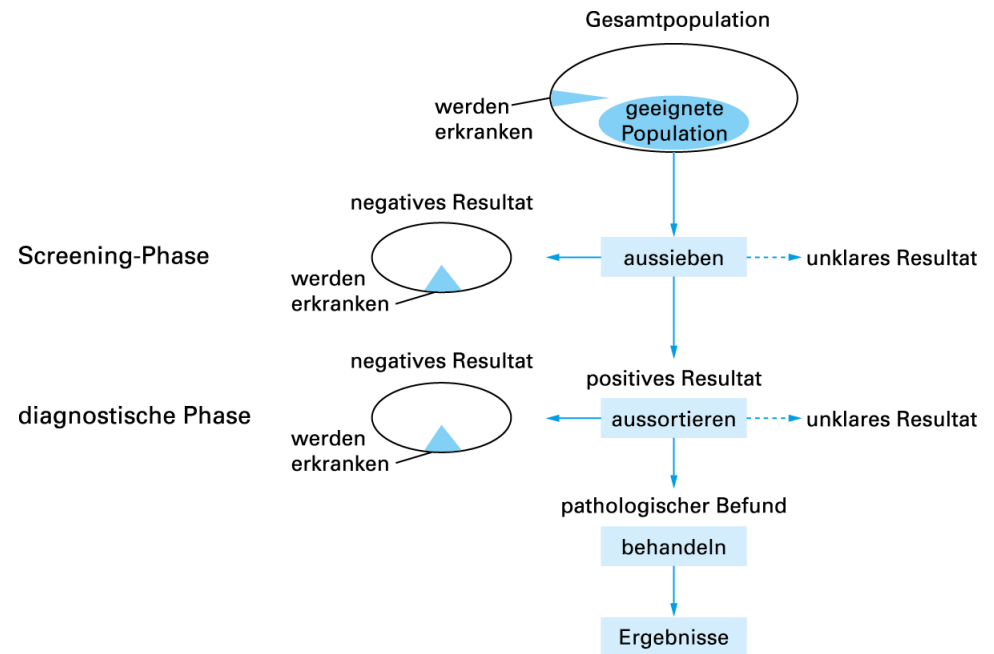

- Risiko von Komplikationen und Nebenwirkungen
1. Besseres Ergebnis aufgrund der frühen Diagnose und Therapie
  2. Gutes Ergebnis, ohne dass die frühe Diagnose einen Einfluss hatte
  3. Schlechtes Ergebnis, ohne dass die frühe Diagnose einen Einfluss hatte
  4. Die Befunde waren ohne Konsequenzen („Scheinkrankheit“) und die Therapie unnötig

**Abb. 4.8:** Änderung der Inzidenzrate und der Letalität mit und ohne Screening, wenn Pseudofälle (= so genannte Scheinkrankheit) in die Berechnungen mit einfließen. Als Lead time bezeichnet man in diesem Zusammenhang die Vorverlegung des Diagnosezeitpunkts. Das Intervallkarzinom wird zwischen zwei Screening-Untersuchungen diagnostiziert und somit vom Screening nicht erfasst (Quelle: modifiziert nach Raffle A, Gray JAM. Screening. Verlag Hans Huber, 2009).

Inzidenz:  
ohne Screening: 3/1000  
mit Screening: 5/1000

Letalität:  
ohne Screening: 33% (1/3)  
mit Screening: 20% (1/5)

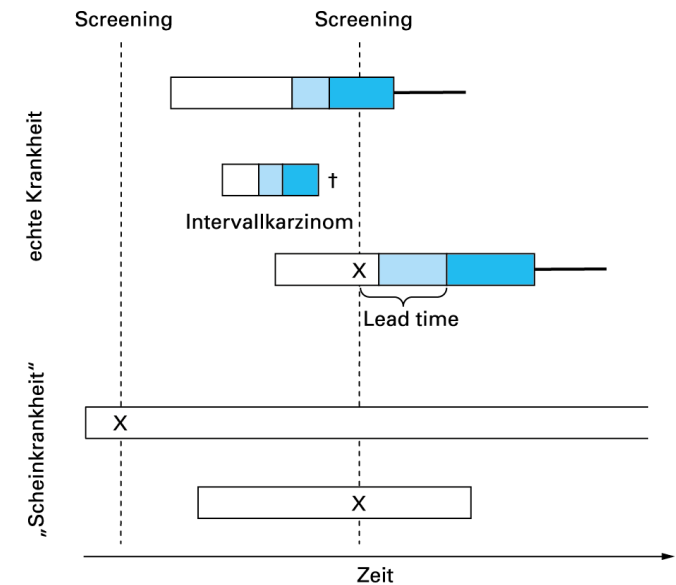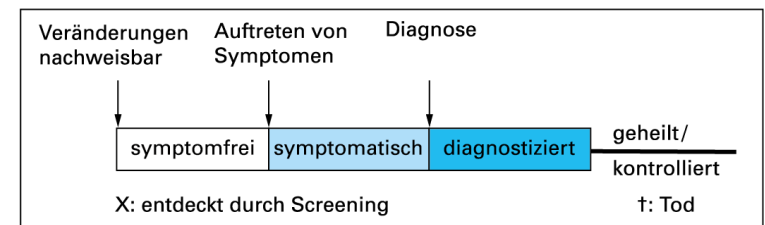

| Grad        | Empfehlung                                                                                                                                                                                                                      |
|-------------|---------------------------------------------------------------------------------------------------------------------------------------------------------------------------------------------------------------------------------|
| A           | Die Maßnahme wird empfohlen.<br><i>Aufgrund der konsistenten Resultate qualitativ hoch stehender Studien ist es praktisch sicher, dass der Nutzen deutlich überwiegt.</i>                                                       |
| B           | Die Maßnahme wird bis auf Weiteres empfohlen.<br><i>Aufgrund der Studienresultate ist es wahrscheinlich, dass der Nutzen überwiegt. Es sind aber weitere Studien notwendig, um die Wirksamkeit der Maßnahme zu präzisieren.</i> |
| C           | Die Maßnahme kann bei einzelnen PatientInnen sinnvoll sein, wird jedoch nicht allgemein empfohlen.<br><i>Aufgrund der Studienresultate ist es wahrscheinlich, dass der Nutzen in den meisten Situationen gering ist.</i>        |
| D           | Die Maßnahme wird nicht empfohlen.<br><i>Aufgrund der Studienresultate ist es praktisch sicher oder wahrscheinlich, dass kein Nutzen resultiert oder der Schaden überwiegt.</i>                                                 |
| I Statement | Die vorhandene Evidenz ist ungenügend (Insufficient).<br><i>Das Verhältnis zwischen Nutzen und Schaden kann nicht beurteilt werden. Weitere Studien sind notwendig.</i>                                                         |

**Tab. 4.3:** Gradeinteilung von präventivmedizinischen Empfehlungen aufgrund der vorhandenen Evidenz.  
Modifiziert nach *United States Preventive Services Task Force (USPSTF)*, 2007.

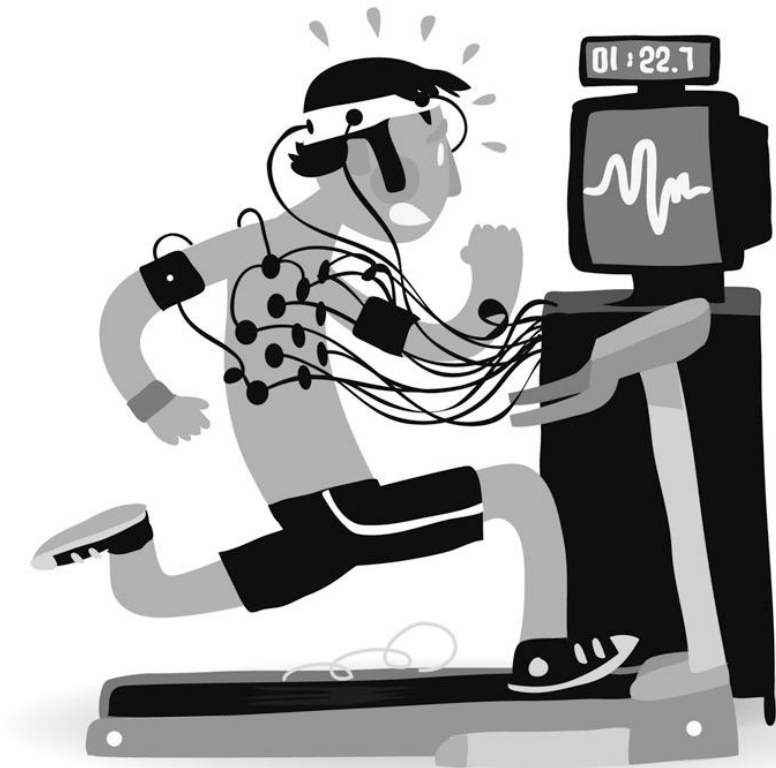

**Abb. 4.9:** Nicht alle Vorsorgeuntersuchungen sind sinnvoll: Das Belastungs-EKG wird aufgrund mangelnder Evidenz nicht empfohlen (Zeichnung: Christoph Frei).

- 
- Anamnese, insbesondere die Erfassung des Risikoprofils
  - Klinische Untersuchungen (körperliche Untersuchung einschließlich Blutdruckmessung)
  - Blutuntersuchung (Cholesterin, Glukose)
  - Urinuntersuchungen (Eiweiß, Glukose, Erythrozyten, Leukozyten und Nitrit mit Harnstreifentest)
  - Beratung über die Ergebnisse
- 

**Tab. 4.4:** *Check-up 35*, in Deutschland empfohlene Untersuchungen bei symptomfreien Männern und Frauen ab einem Alter von 35 Jahren (alle zwei Jahre).

| Übertragung            | Beschreibung                                                                                                               | Beispiele                                                                                                           |
|------------------------|----------------------------------------------------------------------------------------------------------------------------|---------------------------------------------------------------------------------------------------------------------|
| Kontaminiertes Wasser  | Gastrointestinale Infektion in Folge fäkaler Kontamination des Trinkwassers                                                | Typhus, Cholera, Giardiasis, Infektionen mit Campylobacter, Norovirus, enterotoxischen E.coli, Cryptosporidium etc. |
| Mangelnde Hygiene      | Infektionen, die sich ausbreiten, wenn zu wenig Wasser für persönliche Hygiene und Lebensmittelhygiene zur Verfügung steht | Shigellose, Trachom, Skabies                                                                                        |
| Vektor lebt im Wasser  | Infektionen, die durch Vektoren übertragen werden, welche einen Teil ihres Lebenszyklus' im Wasser verbringen              | Schistosomiasis, Drakunkulose                                                                                       |
| Vektor benötigt Wasser | Infektionen, die durch Vektoren übertragen werden, welche Zugang zu Wasser benötigen                                       | Malaria, Onchozerkose, Trypanosomiasis                                                                              |

**Tab. 5.1:** Infektionen mit engem Bezug zu Wasser.

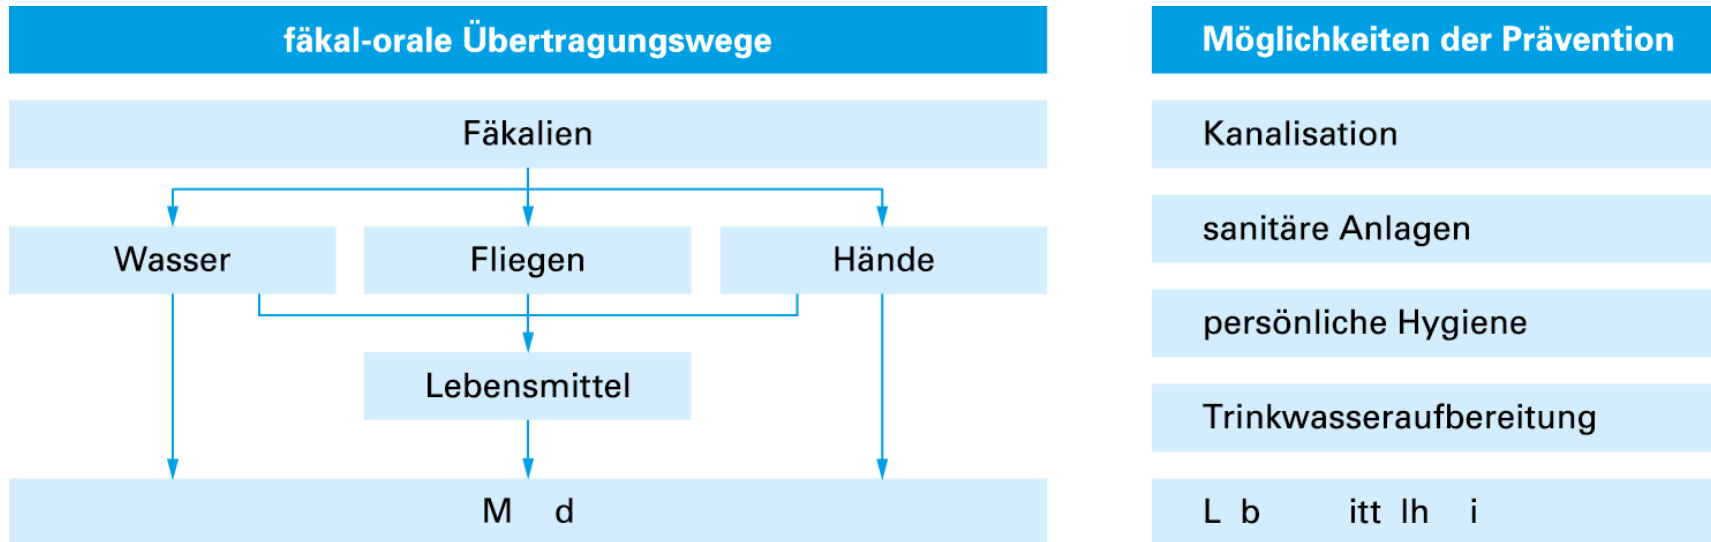

**Abb. 5.1:** Fäkalorale Übertragungswege und dort ansetzende Möglichkeiten der Prävention.

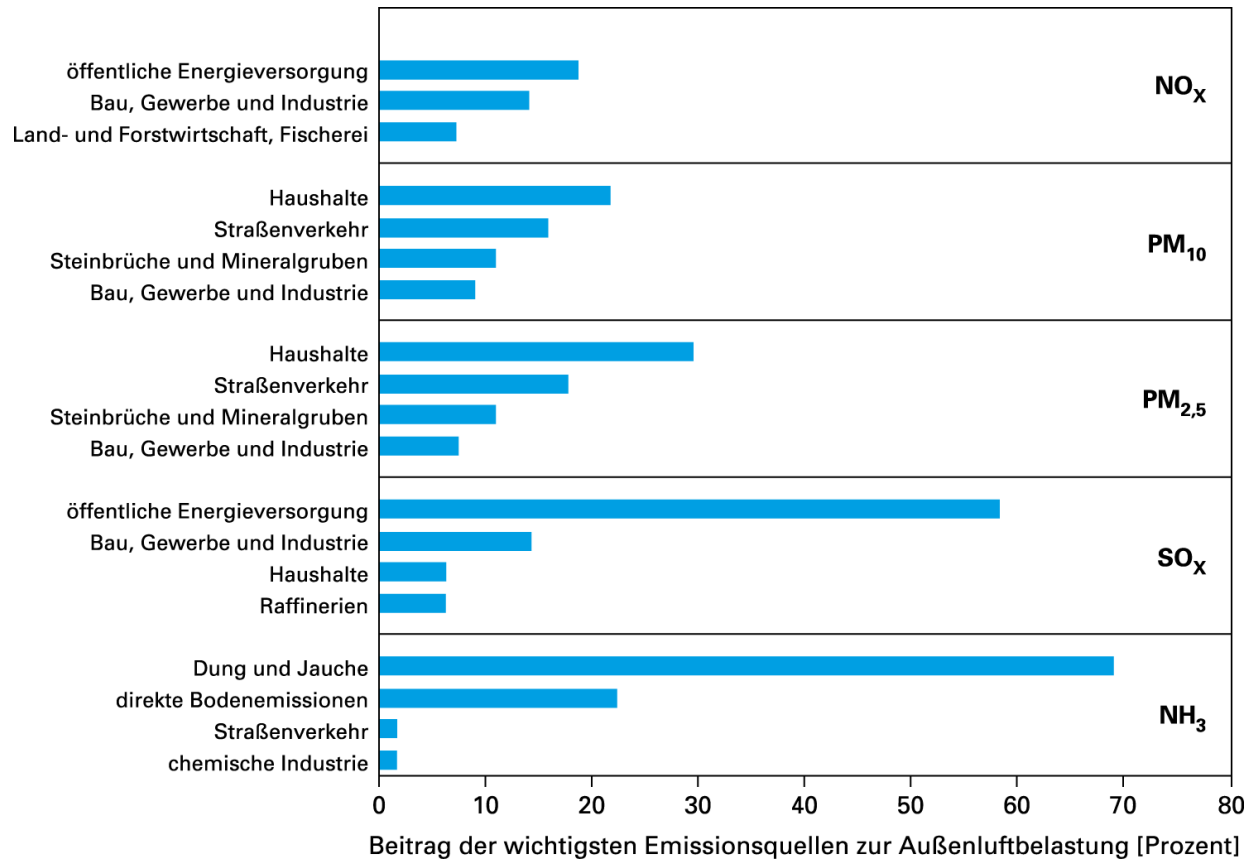

**Abb. 5.2:** Schadstoffe in der Außenluft in Europa im Jahr 2006. Dargestellt sind die Anteile der verschiedenen Emissionsquellen für Stickoxide (NO<sub>x</sub>), Feinstaub (PM<sub>10</sub> und PM<sub>2,5</sub>), Schwefeloxide (SO<sub>x</sub>) und Ammoniak (NH<sub>3</sub>) an den Gesamtemissionen (Quelle: modifiziert nach Künzli N, Perez L, Rapp R. Air Quality and Health. Lausanne, Switzerland: ERS, September 2010; [http:// www.ersnet.org](http://www.ersnet.org)).



**Abb. 5.3:** Abnahme der Staubbelastung im Ruhrgebiet von 1968 bis 2009. Zwischen 1968 und 1999 wurde hierzu der gesamte Schwebstaub (*Total Suspended Particles*, TSP) bestimmt. Ab 1998 hat man die Feinstaub-Werte (Feinstaub mit einem aerodynamischen Durchmesser  $< 10$  Mikrometer [PM10]) registriert. Es handelt sich jeweils um gemittelte Werte von mehreren Messstationen im Rhein-Ruhr-Raum. Das Foto zeigt eine Kupferhütte in Duisburg in den 1970er-Jahren. (Quellen: Grafik nach: Landesamt für Natur, Umwelt und Verbraucherschutz Nordrhein-Westfalen (LANUV NRW), 2011; Fotografie: <http://www.geschichte.nrw.de>; Copyright: dpa)

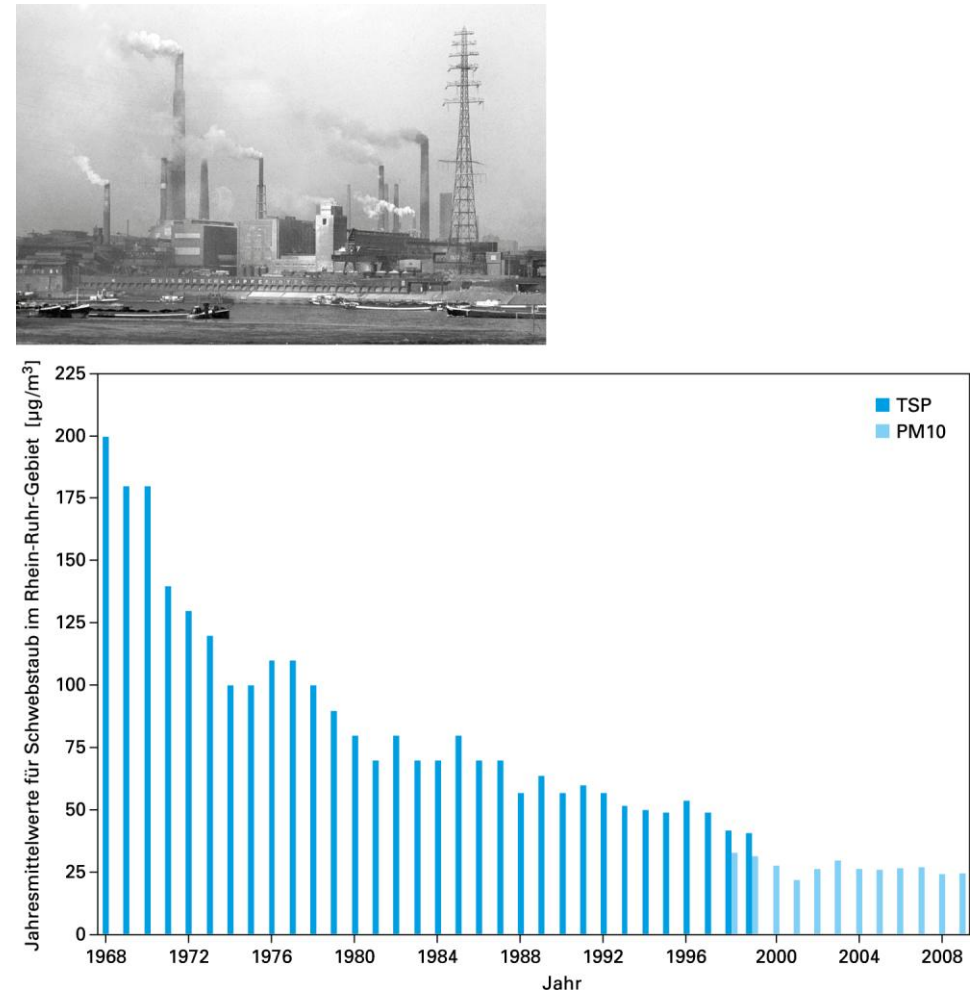

**Tab. 5.2:** Nachgewiesene und vermutete gesundheitliche Auswirkungen von städtischer Luftverschmutzung auf den verschiedenen Wirkungsebenen.

| Wirkungsebene                   | Auswirkungen auf die städtische Luftverschmutzung                                                                                                                                                                                                                                                                                                                                                                                                                                                                                                                                                                                                                                                                                                                                                                |
|---------------------------------|------------------------------------------------------------------------------------------------------------------------------------------------------------------------------------------------------------------------------------------------------------------------------------------------------------------------------------------------------------------------------------------------------------------------------------------------------------------------------------------------------------------------------------------------------------------------------------------------------------------------------------------------------------------------------------------------------------------------------------------------------------------------------------------------------------------|
| <i>Pathophysiologie</i>         | <p><b>Pulmonale Rezeptoren:</b> Aktivierung pulmonaler Rezeptoren und Beeinflussung des vegetativen Nervensystems mit Überwiegen des Sympathikus</p> <p><b>Entzündungsreaktionen:</b> Auslösung von oxidativem Stress und lokaler Entzündung in den Atemwegen und dem Lungengewebe, „Spill over“ der Entzündungsmediatoren in den Körperkreislauf und Auslösung einer subklinischen Entzündungsreaktion im gesamten Körper, Einfluss auf Regulierung der Blutgerinnung und der Gefäßweite</p> <p><b>Übertritt von Schadstoffen in Blutbahn:</b> Auslösung einer subklinischen Entzündungsreaktion im gesamten Körper, Einfluss auf Regulierung der Blutgerinnung und der Gefäßweite</p> <p><b>Neuronaler Übertritt ins Gehirn:</b> Auslösung von Entzündungsherden im zentralen Nervensystem</p>                 |
| <i>Akute Symptome/Wirkungen</i> | <p><b>Mortalität:</b> Erhöhung der täglichen Sterblichkeit (v.a. kardio-respiratorische Ursachen)</p> <p><b>Herz-Kreislauf-System:</b> Anstieg täglicher Herzinfarkt- und Schlaganfallraten, akute Dekompensation einer Herzinsuffizienz, akute Verschlechterung der Lungenfunktion</p> <p><b>Atemwege:</b> Zunahme von Atemwegsbeschwerden bei Kindern und Erwachsenen, Abnahme der Lungenfunktion, Auslösung von Asthmaanfällen</p> <p><b>Reproduktion:</b> Mittelfristig verringertes Geburtsgewicht und erhöhte perinatale Sterblichkeit</p>                                                                                                                                                                                                                                                                 |
| <i>Langfristige Wirkungen</i>   | <p><b>Mortalität:</b> Verkürzung der Lebenserwartung</p> <p><b>Herz-Kreislauf-System:</b> Erhöhte Inzidenz kardiovaskulärer und zerebrovaskulärer Ereignisse, Hinweise für Mitverursachung der Arteriosklerose und ihrer Folgeerkrankungen, insbesondere koronare Herzkrankheit (KHK) und periphere arterielle Verschlusskrankheit (pAVK)</p> <p><b>Atemwege:</b> Verursachung von Asthma bronchiale bei Kindern, Verschlechterung der Lungenfunktion, verringertes Lungenwachstum bei Kindern, Hinweise auf Mitauslösung der chronisch obstruktiven Lungenerkrankung (COPD), Hinweise auf Mitverursachung des Bronchialkarzinoms</p> <p><b>Stoffwechsel:</b> Hinweise auf Mitwirkung bei der Entwicklung eines Diabetes mellitus</p> <p><b>Kognitive Funktion:</b> erste Hinweise auf eine Beeinträchtigung</p> |
| <i>Gesundheitssystem</i>        | <p><b>Akut:</b> Vermehrte Krankenhauseinweisungen, Notfallstationsbesuche, Arztbesuche wegen Herz-Kreislauf- und Atemwegserkrankungen</p> <p><b>Langfristig:</b> Erhöhung der chronischen Morbidität der Bevölkerung, v.a. durch Beeinflussung von Herz-Kreislauf- und Atemwegserkrankungen.</p>                                                                                                                                                                                                                                                                                                                                                                                                                                                                                                                 |

**Abb. 5.4:** Überblick über Schallpegel in unserer Umwelt und die damit verbundenen Gesundheitsrisiken.  
(Zeichnung: Christoph Frei; nach einer Vorlage der Fa. OHROPAX GmbH, Wehrheim)

## Vorsicht Lärm!

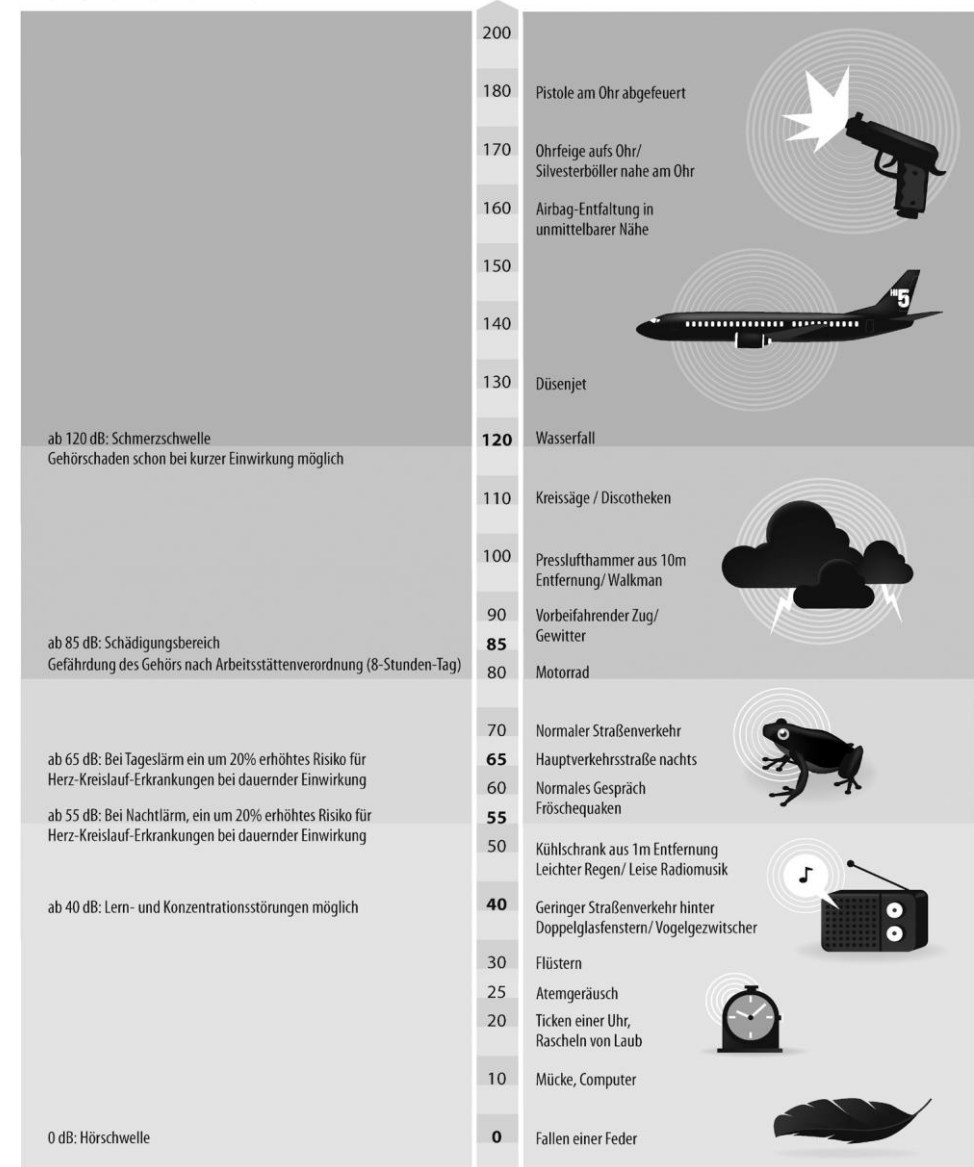

| Grad der Belästigung | hochgradig gestört<br>und belästigt* | wesentlich gestört<br>und belästigt** | allgemein gestört<br>und belästigt*** |
|----------------------|--------------------------------------|---------------------------------------|---------------------------------------|
| Ursache              | %                                    | %                                     | %                                     |
| Straßenverkehr       | 5,9                                  | 26,5                                  | 54,3                                  |
| Nachbarn             | 3,6                                  | 17,8                                  | 42,0                                  |
| Flugverkehr          | 1,6                                  | 6,6                                   | 22,8                                  |
| Industrie/Gewerbe    | 2,0                                  | 12,8                                  | 31,9                                  |
| Schienenverkehr      | 3,0                                  | 14,9                                  | 33,6                                  |

\* aufsummiert aus den Kategorien: äußerst/stark gestört und belästigt

\*\* aufsummiert aus den Kategorien: äußerst/stark/mittelmäßig gestört und belästigt

\*\*\* aufsummiert aus den Kategorien: äußerst/stark/mittelmäßig/etwas gestört und belästigt

Quelle: Repräsentativumfrage zu Umweltbewusstsein und Umweltverhalten im Jahr 2012. Umweltforschungsplan des Bundesministeriums für Umwelt, Naturschutz und Reaktorsicherheit Förderkennzeichen 3711 17 11; Jana Rückert-John (ISInova e.V.) Inka Bormann, René John (Philipps-Universität Marburg) Berlin, Marburg 2013. <http://www.uba.de/uba-info-medien/4396.html>.

**Tab. 5.3:** Lärmbelästigung der Bevölkerung in Deutschland, unterschieden nach Geräuschquellen (2012)  
Angaben in Prozent

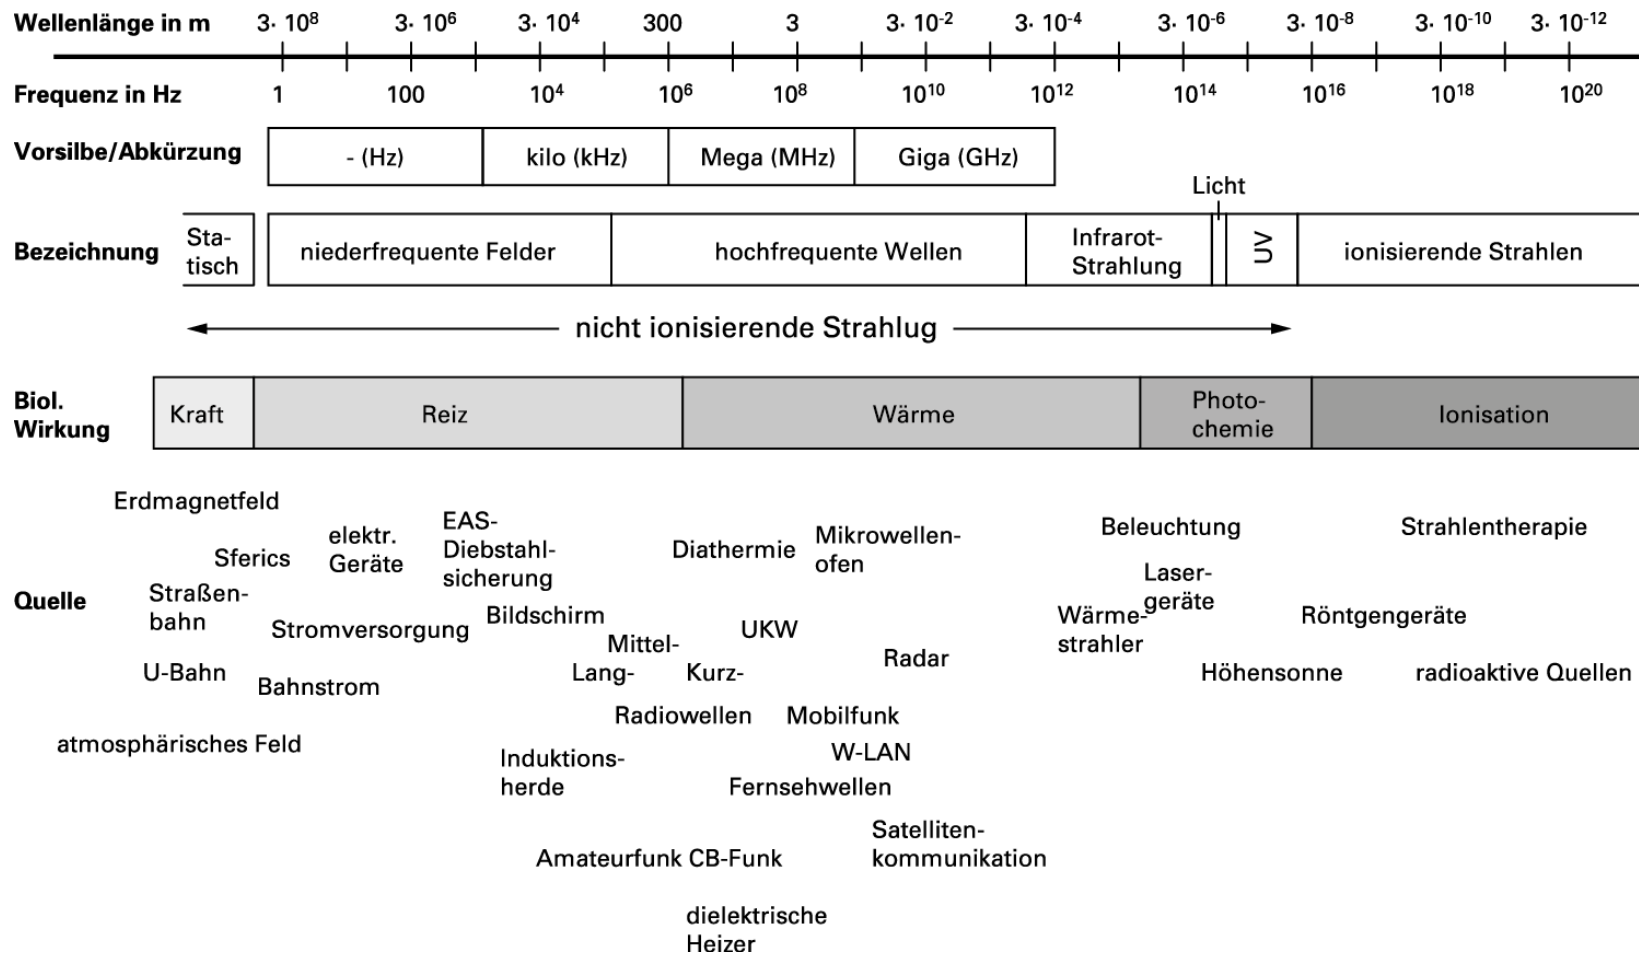

**Abb. 5.5:** Überblick über das elektromagnetische Spektrum. (Quelle: Rösli M, Rapp R, Braun-Fahrländer C. Hochfrequente Strahlung und Gesundheit – eine Literaturanalyse. Gesundheitswesen 2003; 65:378–392).

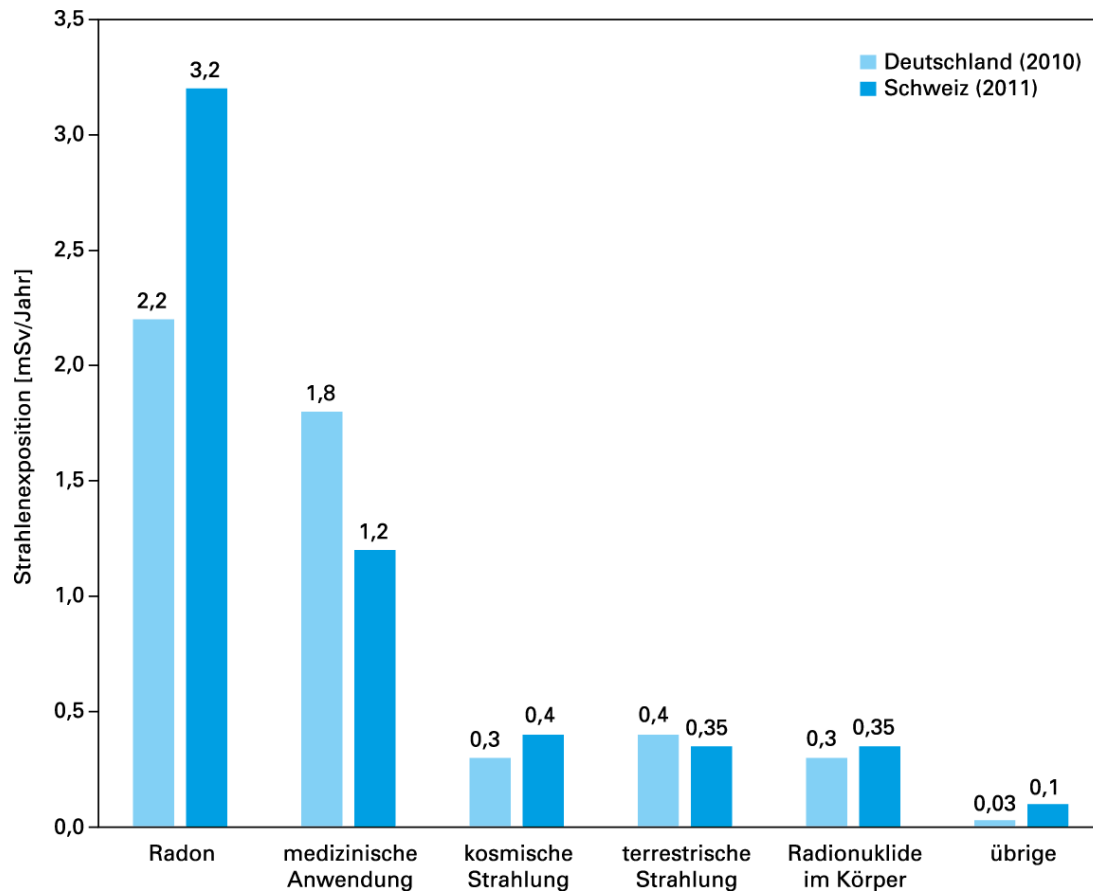

**Abb. 5.6:** Durchschnittliche Strahlenexposition der Bevölkerung in der Schweiz (2011) und in Deutschland (2010). Zur besseren Vergleichbarkeit wurden die Angaben der Radon-Exposition in beiden Fällen mit dem „neuen“, nach 2009 angewandten Radondosisfaktor berechnet (Quellen der dieser Abbildung zugrunde liegende Daten: Schweiz: <http://www.bag.admin.ch>; Deutschland: <http://www.umweltbundesamt-daten-zur-umwelt.de/>).

| Untersuchung                                      | Äquivalentdosis (in mSv) |
|---------------------------------------------------|--------------------------|
| Thorax-, Zahn- oder Schädelröntgen                | 0,015                    |
| Abdomen- oder Wirbelsäulenröntgen                 | 0,3–0,5                  |
| Mammographie (4 Bilder)                           | 0,2–2                    |
| Kontrastaufnahmen (Bariumpassagen, Angiographien) | 1–7                      |
| Computertomographie                               | 5–25                     |

**Tab. 5.4:** Effektive Strahlendosen, denen PatientInnen im Rahmen der medizinischen Diagnostik ausgesetzt sind.

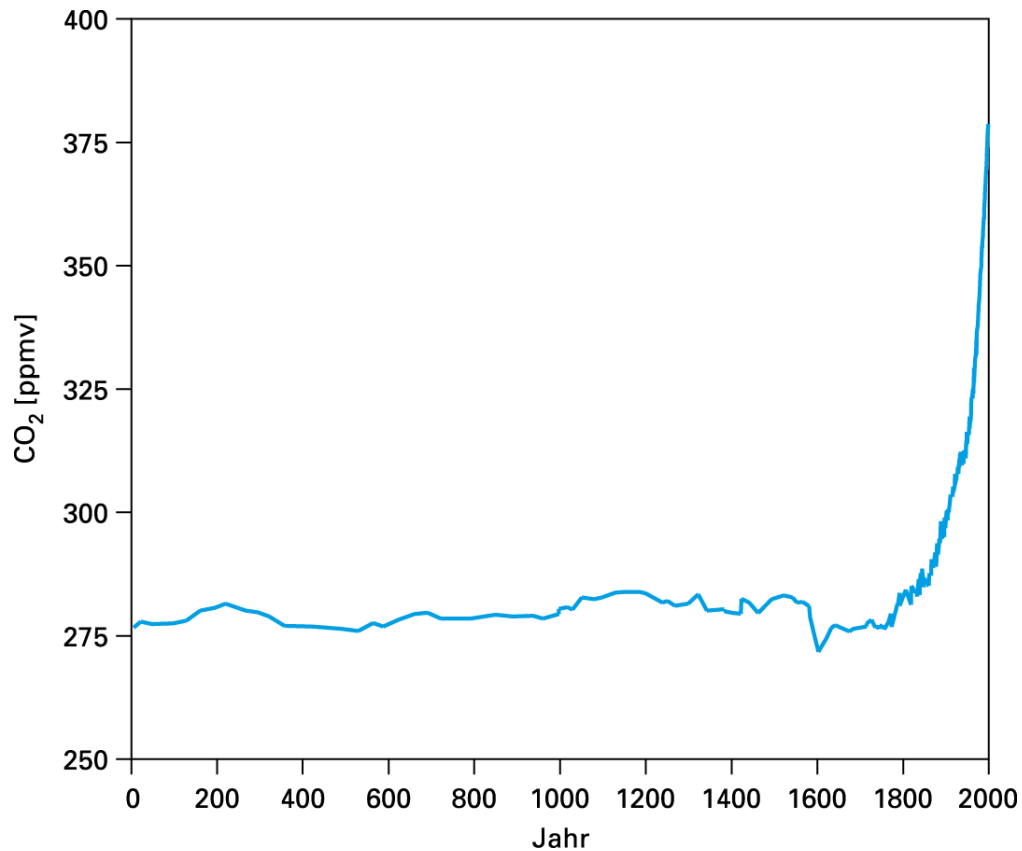

**Abb. 5.7:** Änderung der CO<sub>2</sub>-Konzentration in der Atmosphäre in den letzten 2.000 Jahren. Die der Abbildung zugrunde liegenden Daten basieren auf der Untersuchung von Eisbohrkernen sowie auf atmosphärischen Messungen (Quelle: modifiziert nach MacFarling Meure C et al. The Law Dome CO<sub>2</sub>, CH<sub>4</sub> and N<sub>2</sub>O Ice Core Records Extended to 2000 years BP. *Geophysical Research Letters*, Vol. 33, L14810, doi: 10.1029/2006GL026152, 2006).



| Ursachen                                                                                                                                                                         | Gesundheitsfolgen                                                                                                                                                                                                                                                                                                                                               |
|----------------------------------------------------------------------------------------------------------------------------------------------------------------------------------|-----------------------------------------------------------------------------------------------------------------------------------------------------------------------------------------------------------------------------------------------------------------------------------------------------------------------------------------------------------------|
| <b>Direkte (primäre) Folgen</b>                                                                                                                                                  |                                                                                                                                                                                                                                                                                                                                                                 |
| Mehr Hitzewellen, weniger Kältetage                                                                                                                                              | <p>Erhöhtes Risiko für</p> <ul style="list-style-type: none"> <li>• Hitzebedingte Sterblichkeit, insbesondere bei älteren Menschen, Kleinkindern, chronisch Kranken und gesellschaftlich Isolierten</li> <li>• Rückgang kältebedingter Sterblichkeit (kompensiert die Zahl der Hitzetoten nicht)</li> </ul>                                                     |
| Zunahme von Extremereignissen (Starkregen, Stürme, Überschwemmungen)                                                                                                             | <p>Erhöhtes Risiko für</p> <ul style="list-style-type: none"> <li>• Todesfälle und Verletzungen</li> <li>• Wasser- und nahrungsmittelübertragene Krankheiten</li> <li>• Posttraumatische Belastungsstörungen</li> <li>• Infektions-, Atemwegs- und Hauterkrankungen</li> </ul>                                                                                  |
| <b>Indirekte (sekundäre) Folgen, vermittelt durch ökologische Veränderungen</b>                                                                                                  |                                                                                                                                                                                                                                                                                                                                                                 |
| Ausbreitung von Dürregebieten, Reduktion der landwirtschaftlichen Produktivität, verändertes Verbreitungsgebiet und veränderte Infektiosität von Krankheitserregern und Vektoren | <p>Erhöhtes Risiko für</p> <ul style="list-style-type: none"> <li>• Nahrungsmittel- und Wasserknappheit; Mangel- und Fehlernährung; kindliche Entwicklungsverzögerungen</li> <li>• Krankheiten, die durch Wasser oder Nahrungsmittel übertragen werden</li> <li>• Infektionskrankheiten (v. a. armutsassoziiert): Durchfälle, Malaria, Dengue-Fieber</li> </ul> |
| <b>Indirekte (tertiäre) Folgen, vermittelt durch vermehrte soziale Instabilität</b>                                                                                              |                                                                                                                                                                                                                                                                                                                                                                 |
| Zunahme von Kriegen, Flüchtlingsströmen und Hungersnöten, Entwicklungsstagnation in den betroffenen Gebieten                                                                     | <p>Erhöhtes Risiko für</p> <ul style="list-style-type: none"> <li>• Todesfälle, Verletzungen, Behinderungen</li> <li>• Alle armutsbedingten Krankheiten</li> <li>• Posttraumatische Belastungsstörungen</li> </ul>                                                                                                                                              |

**Tab. 5.5:** Direkte und indirekte Gesundheitsfolgen des Klimawandels auf die globale Gesundheit.

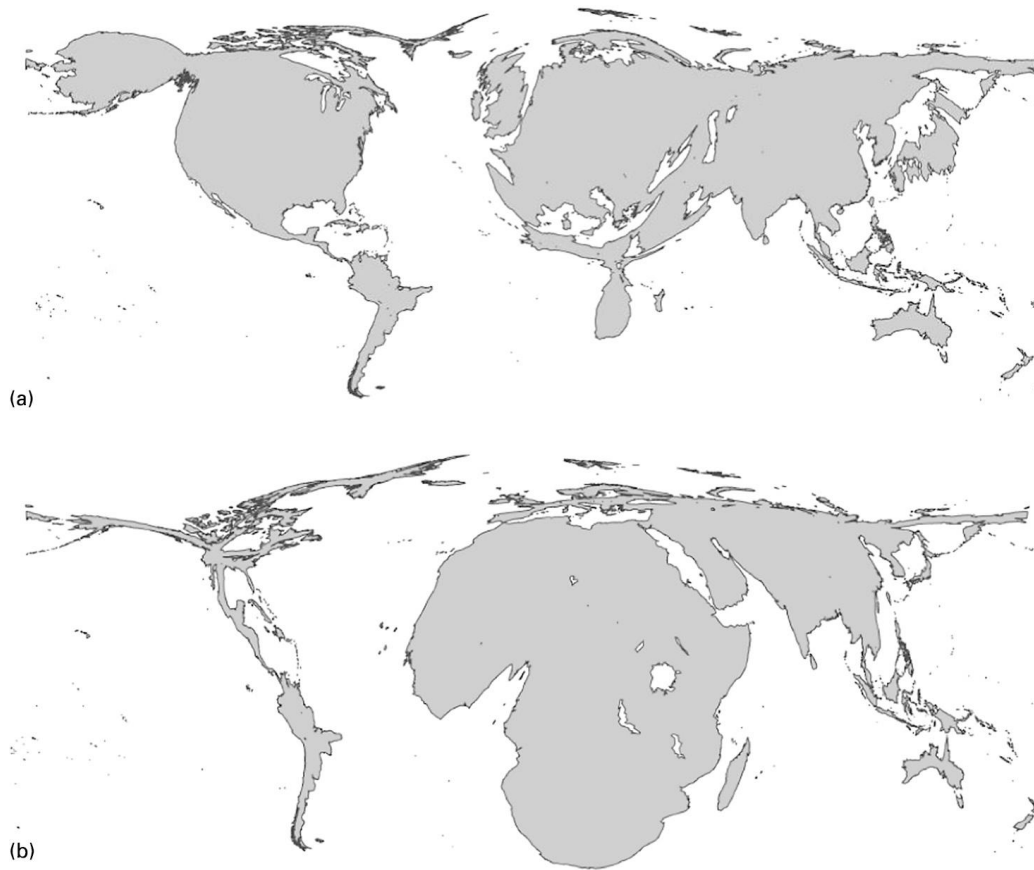

**Abb. 5.8:** (a) Verzernte Darstellung der Erdoberfläche entsprechend dem Wert der dort freigesetzten kumulativen Emissionen von Treibhausgasen, einbezogen wurden Werte bis zum Jahr 2002; (b) Verzernte Darstellung der Erdoberfläche entsprechend dem Wert der dortigen Mortalität, der im Jahr 2000 durch den Klimawandel verursacht wurde (Quelle: WHO. Protecting Health From Climate Change: Connecting Science, Policy and People. Geneva: World Health Organization, 2009).

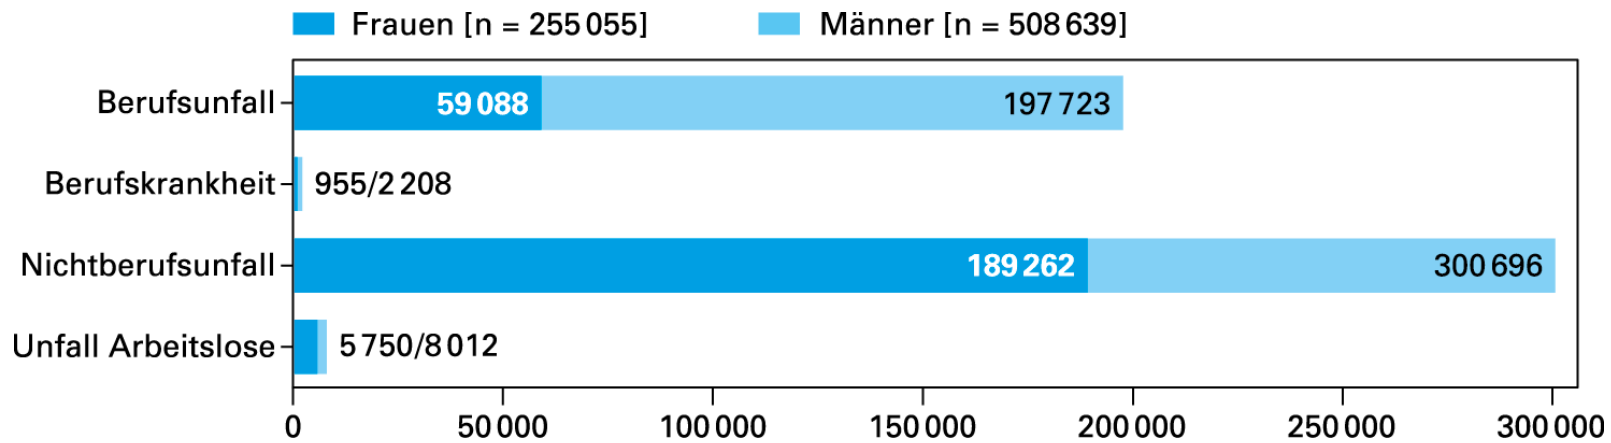

**Abb. 6.1:** Häufigkeit anerkannter Unfälle und Berufskrankheiten bei Männern und Frauen in der Schweiz. Resultate einer repräsentativen Erhebung der Kommission für die Unfallstatistik UVG, 2011 (Quelle: <http://www.unfallstatistik.ch>).

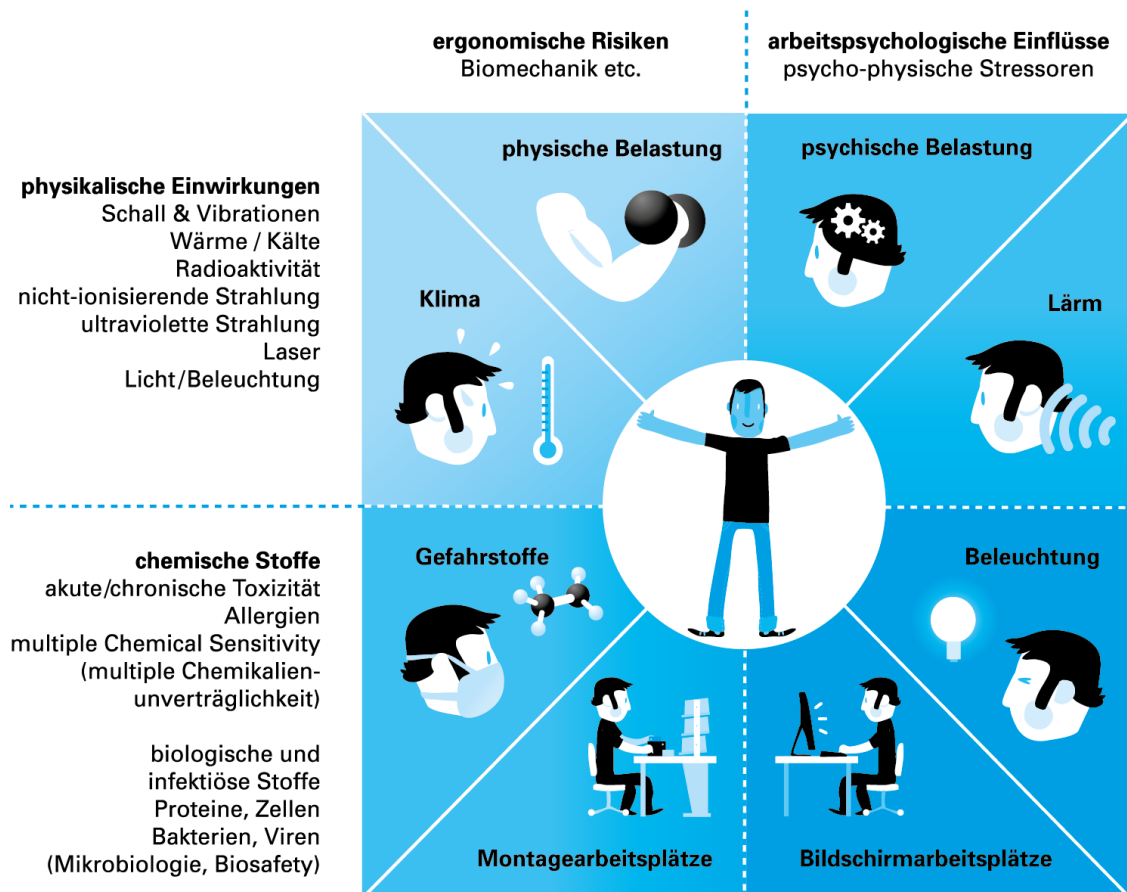

**Abb. 6.2:** Gesundheitsgefahren am Arbeitsplatz (Quelle: Zeichnung Christoph Frei nach Guldemann; <http://vorstand.sgluc.ch>).

---

|                                   |                                                                                                                                                                                                                                                                                                                                                                                                                                                                               |
|-----------------------------------|-------------------------------------------------------------------------------------------------------------------------------------------------------------------------------------------------------------------------------------------------------------------------------------------------------------------------------------------------------------------------------------------------------------------------------------------------------------------------------|
| <b>Systemische Maßnahmen</b>      | <ul style="list-style-type: none"> <li>• Möglichst gefährdende Stoffe durch nicht oder weniger gefährdende Stoffe ersetzen. Gefährliche Arbeitsabläufe durch nicht oder weniger gefährdende Produktionsweisen ersetzen</li> </ul>                                                                                                                                                                                                                                             |
| <b>Technische Maßnahmen</b>       | <ul style="list-style-type: none"> <li>• Möglichst geringe Expositionswerte durch technische Maßnahmen am Entstehungsort (Quelle)</li> </ul>                                                                                                                                                                                                                                                                                                                                  |
| <b>Organisatorische Maßnahmen</b> | <ul style="list-style-type: none"> <li>• Möglichst zeitliche Beschränkung der Exposition</li> <li>• Begrenzung der Zahl der exponierten Personen durch räumliche Trennung</li> </ul>                                                                                                                                                                                                                                                                                          |
| <b>Persönliche Maßnahmen</b>      | <ul style="list-style-type: none"> <li>• Persönlicher Schutz <ul style="list-style-type: none"> <li>– Verhaltensschulung, um Verhaltensänderungen (Akzeptanz von Schutzmaßnahmen) zu erreichen</li> <li>– Persönlicher Schutz nur wenn notwendig</li> </ul> </li> <li>• Personalauswahl</li> <li>• Vorsorgeuntersuchungen im Rahmen der arbeitsmedizinischen Betreuung im Hinblick auf die Erkennung empfindlicher Personen und die Früherkennung von Erkrankungen</li> </ul> |

---

**Tab. 6.1:** Das **STOP-Prinzip:** Hierarchie der Arbeitssicherheits-Maßnahmen, die in der angegebenen Reihenfolge in Zusammenarbeit mit allen Fachkräften der Arbeitssicherheit (SicherheitsingenieurInnen, ArbeitshygienikerInnen, ArbeitsmedizinerInnen) durchgeführt werden sollten.

**Abb. 6.3:** Beispiel einer Dosis-Wirkungs-Kurve. Dargestellt sind die kumulativen Inzidenzraten des Harnblasenkarzinoms in Abhängigkeit von der Expositionsdauer bei Beschäftigten, die während ihrer Tätigkeit mit 2-Naphthylamin- und Benzidin-Destillationsprodukten in Kontakt kommen. Eingezeichnet sind die beiden am besten angepassten Funktionen (polynomisch, exponentiell). Mit Hilfe der unterschiedlichen Kurven wird versucht, die Resultate für niedrigere Expositionen zu extrapolieren. Je nach Wahl des Modells ergibt sich bei geringer Exposition ein unterschiedliches Bild (ein immer noch vorhandenes Risiko oder kein Risiko) (Quelle: Reproduced with permission from Environmental Health Perspectives; nach: Zeise L, Wilson R, Crouch EA. Dose-response relationships for carcinogens: a review. Environ Health Perspect. 1987; 73: 259–306).

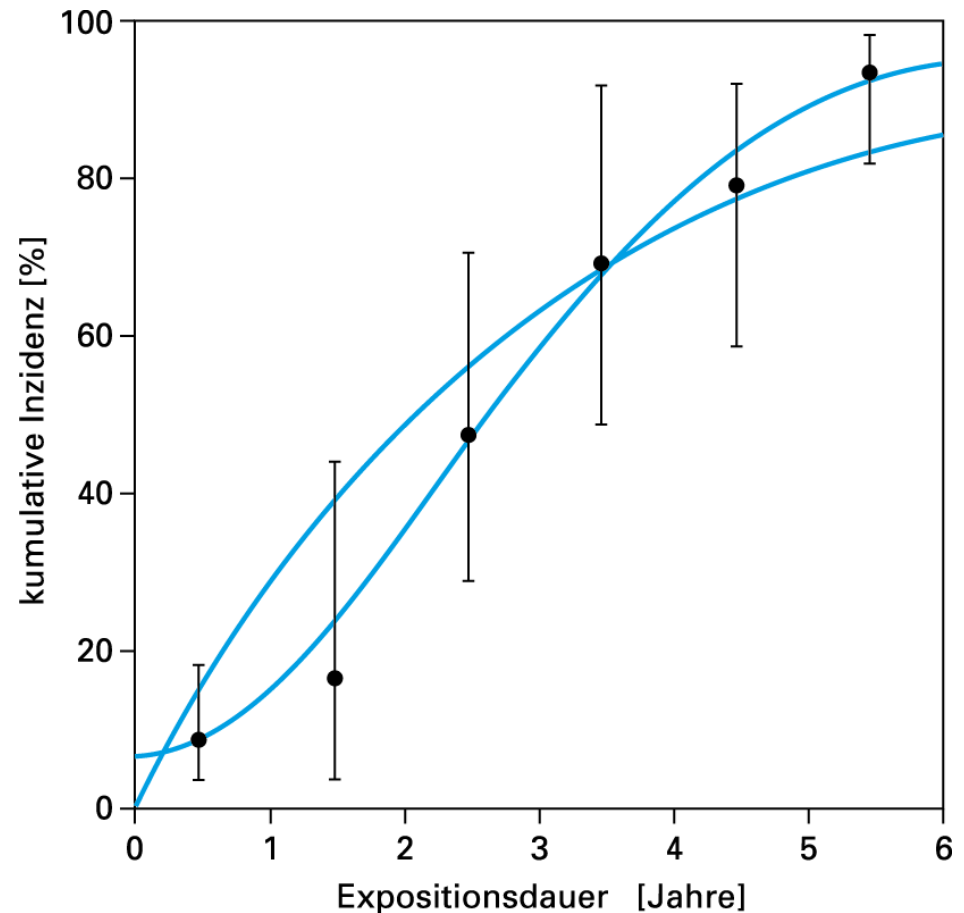

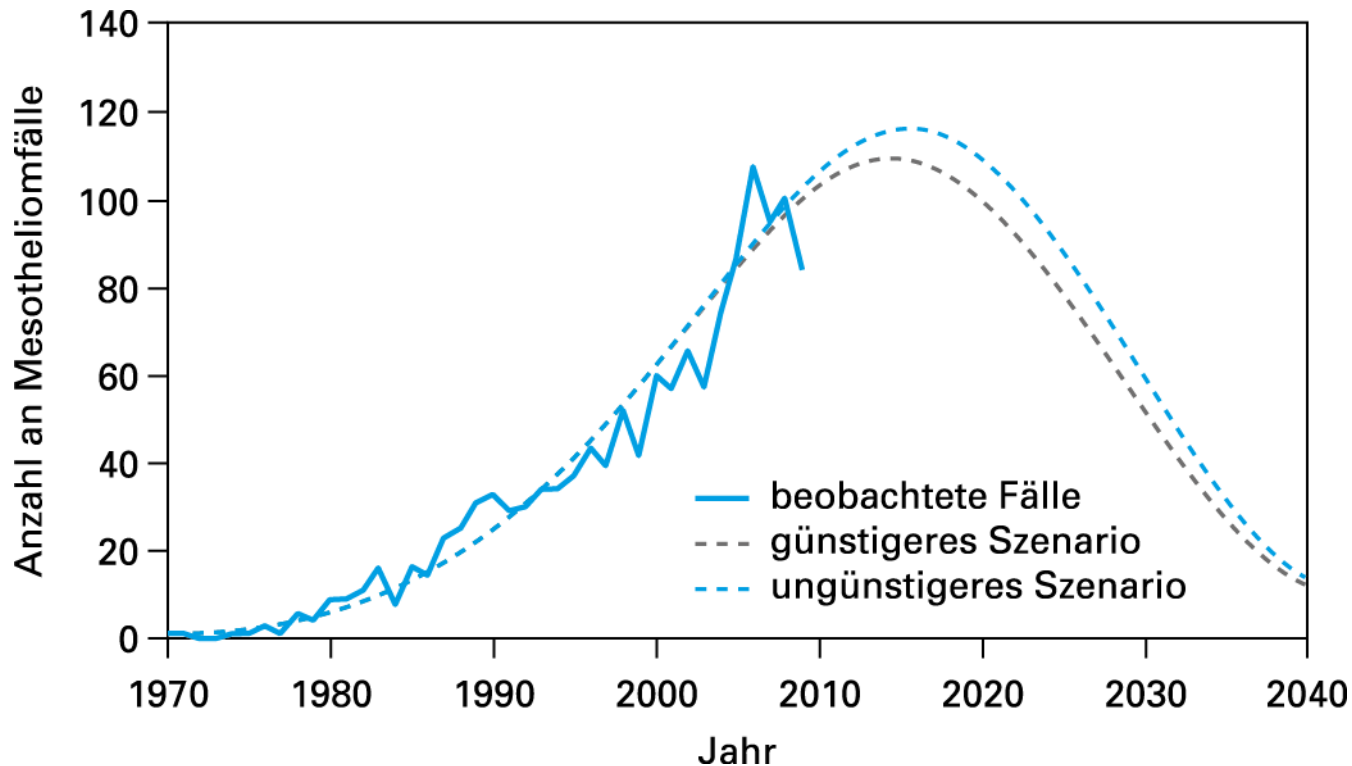

**Abb. 6.4:** Prognose der Statistik der Schweizerischen Unfallversicherung zur Anzahl der durch Asbest ausgelösten Mesotheliomfälle in der Schweiz (Modellrechnung, Schweiz. Unfallstatistik UVG, 2011). Durch Asbest ausgelöste Mesotheliome sind in der Regel Pleuramesotheliome. Dies sind bösartige Tumoren, die vom Lugen- bzw. Rippenfell (Pleura) ausgehen (Quelle: Sammelstelle für die Statistik der Unfallversicherung UVG (SSUV)).

---

|                                               |                               |
|-----------------------------------------------|-------------------------------|
| Acetaldehyd                                   | Kobalt und seine Verbindungen |
| Asbeststaub                                   | Kohlenmonoxid                 |
| Benzine                                       | Kolophonium                   |
| Benzol                                        | Latex                         |
| Beryllium, seine Verbindungen und Legierungen | Mangan und seine Verbindungen |
| Blei, seine Verbindungen und Legierungen      | Menthol                       |
| Brom                                          | Mineralöle                    |
| Cadmium und seine Verbindungen                | Ozon                          |
| Chromverbindungen                             | Phenol und seine Homologen    |
| Cyan und seine Verbindungen                   | Zement                        |
| Epoxidharze                                   | Zink und seine Verbindungen   |
| Halogenierte organische Verbindungen          | Zinnverbindungen              |
| Holzstaub                                     |                               |

---

**Tab. 6.2:** Eine Liste ausgewählter schädigender Stoffe am Arbeitsplatz im Sinne von Art. 9 Absatz 1 des Schweizerischen UVG (Unfallversicherungsgesetz).



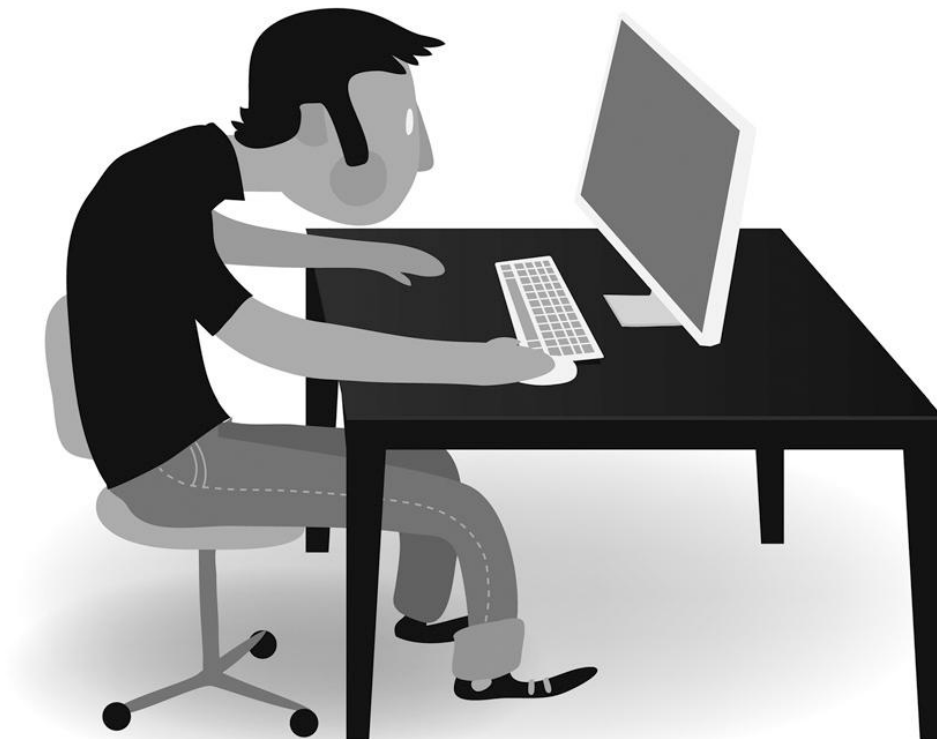

**Abb. 6.5:** Geierhalsstellung als Risikofaktor für arbeitsbezogene Nackenschmerzen (Quelle: Zeichnung Christoph Frei, nach Läubli).

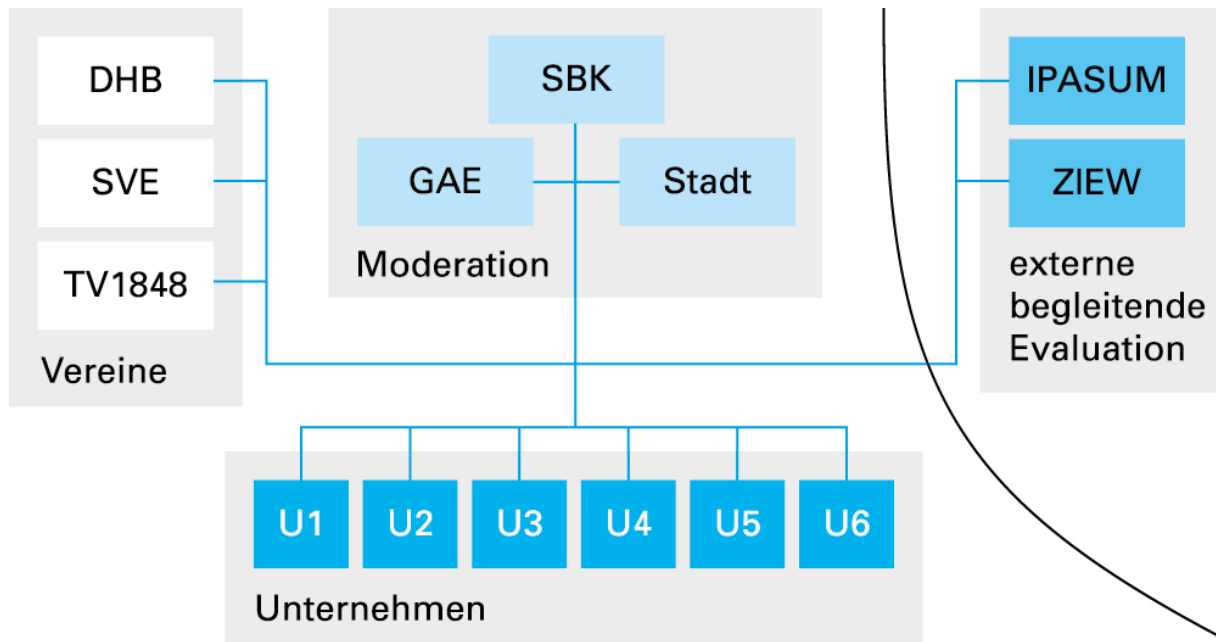

**Abb. 6.6:** Beispiel für die Struktur eines lokalen Netzwerkes zur betrieblichen Gesundheitsförderung: „Bewegte Unternehmen Erlangen“. Die Moderation des Netzwerkes geschieht durch die Stadt Erlangen, das Gesundheitsamt Erlangen (GAE) und eine örtliche Krankenkasse (SBK). Unterstützt wird das Netzwerk durch Vereine (Sportvereine SVE, TV 1848) und den Deutschen Hausfrauenbund (DHB). Eine externe begleitende Evaluation des Netzwerkes geschieht durch das Institut und Poliklinik für Arbeits-, Sozial- und Umweltmedizin der Universität Erlangen-Nürnberg (IPASUM) und das Zentralinstitut für Angewandte Ethik und Wissenschaftskommunikation (ZIEW). (Quelle: Wolfgang Fischmann, Friedrich-Alexander-Universität Erlangen-Nürnberg).

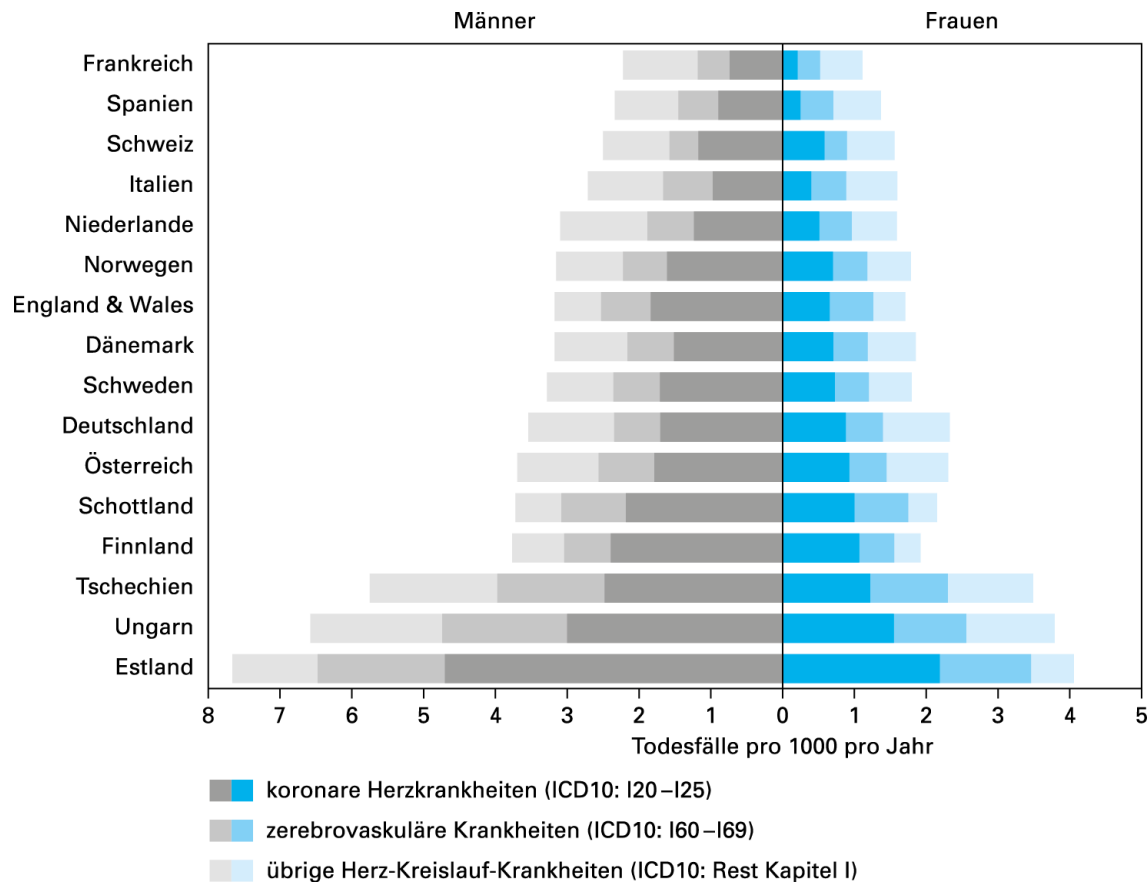

**Abb. 7.1:** Herz-Kreislauf-Mortalität in Europa im Jahr 2001/2002 bei Männern und Frauen (Quelle: WHO, Mortality Database).

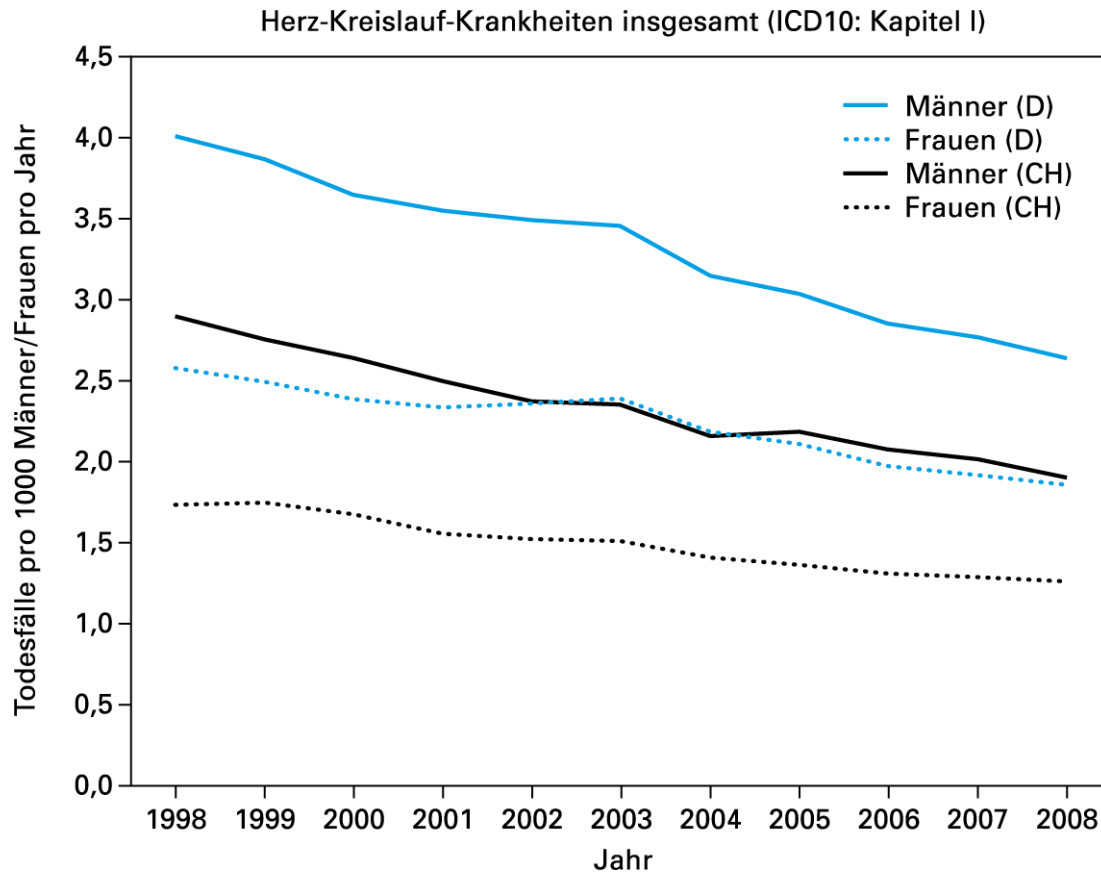

**Abb. 7.2:** Entwicklung der Herz-Kreislauf-Mortalität in Deutschland und der Schweiz in den Jahren 1998 bis 2008 bei Männern und Frauen (Quelle: WHO, Mortality Database. Die Raten wurden mit Hilfe der Standard-Europabevölkerung alterstandardisiert).

**Abb. 7.3:** Altersstandardisierte Krebs-Mortalitätsraten der häufigsten Krebsarten bei Männern und Frauen in der Schweiz, 1970–2009. Als Cervix-Karzinom bezeichnet man den Gebärmutterhals-Krebs.

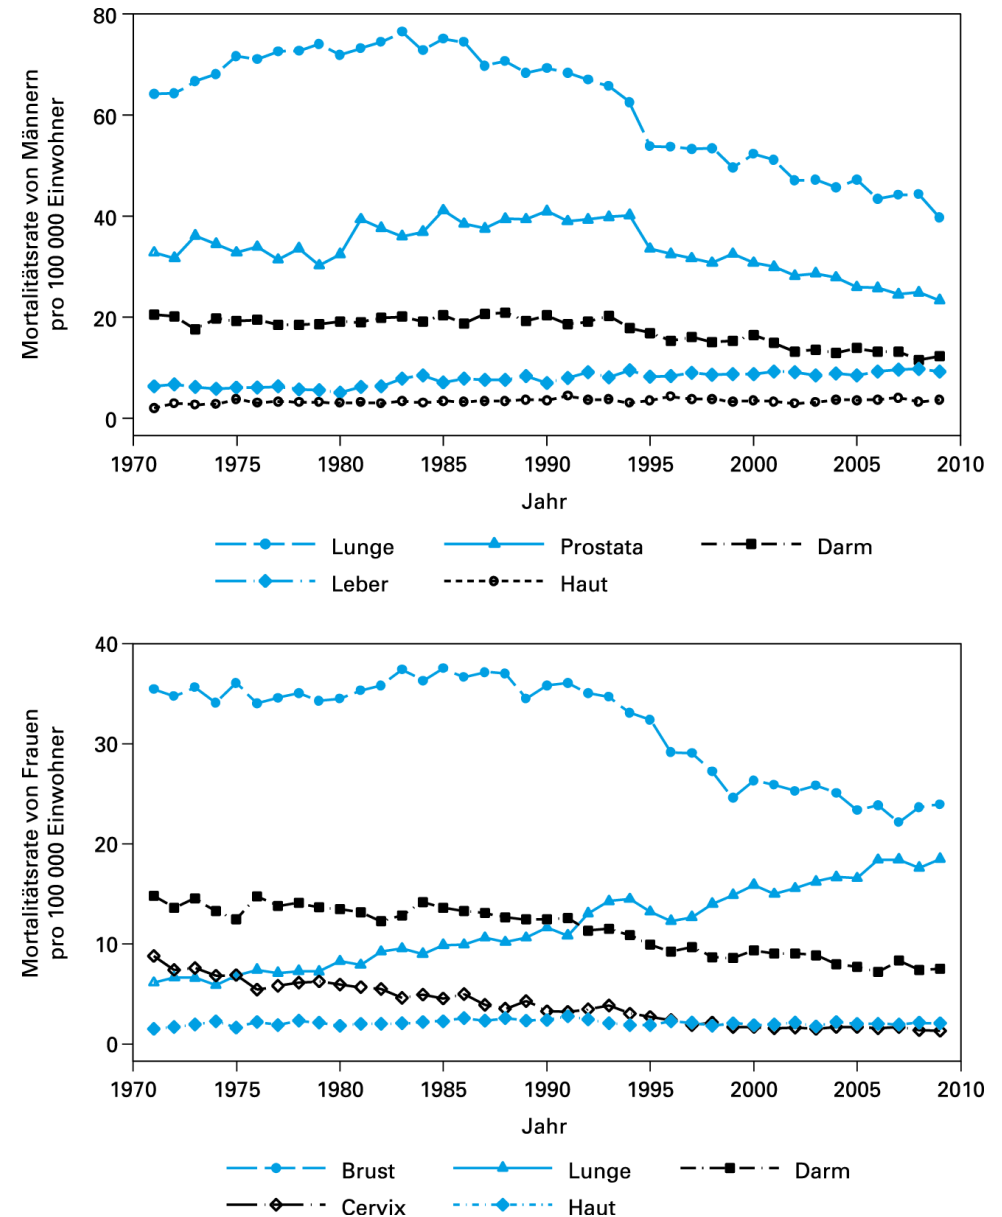

| Krebsart                                                | Methode                                                                                   | Alter oder Zielgruppe      | Frequenz                                                                                 |
|---------------------------------------------------------|-------------------------------------------------------------------------------------------|----------------------------|------------------------------------------------------------------------------------------|
| <b>Guter Evidenzgrad für Screening Empfehlung</b>       |                                                                                           |                            |                                                                                          |
| Brustkrebs                                              | Mammografie                                                                               | ≥ 50 J.                    | Alle 2 Jahre                                                                             |
| Gebärmutterhalskrebs<br>(Cervixkarzinom)                | Abstrich                                                                                  | ≥ 25 J.                    | Jährlich bis alle<br>3 Jahre, hängt von<br>den Resultaten der<br>vorherigen Abstriche ab |
| Darmkrebs                                               | Test auf okkultes Blut<br>im Stuhl                                                        | ≥ 50 J.                    | Jährlich                                                                                 |
|                                                         | Sigmoidoskopie                                                                            | 55–64 J.                   | Einmalig                                                                                 |
| <b>Evidenzlage für Empfehlung ungenügend</b>            |                                                                                           |                            |                                                                                          |
| Prostatakrebs                                           | PSA-Test                                                                                  | ≥ 50 J.                    | Jährlich                                                                                 |
| Lungenkrebs                                             | Computertomographische<br>Untersuchung                                                    | Raucher oder<br>Ex-Raucher | Unklar                                                                                   |
| <b>Evidenzlage genügend für Ablehnung von Screening</b> |                                                                                           |                            |                                                                                          |
| Neuroblastom                                            | Urintest auf<br><i>Homovanillinsäure</i> (HVA)<br>und<br><i>Vanillinmandelsäure</i> (VMA) | –                          | –                                                                                        |
| Lungenkrebs                                             | Röntgenbild                                                                               | –                          | –                                                                                        |
| Brustkrebs                                              | Selbstuntersuchung                                                                        | –                          | –                                                                                        |

**Tab. 7.1:** Übersicht über die Evidenzlage zum Screening für verschiedene Krebsarten; adaptiert nach dem Kapitel „Früherkennung“ im „Nationalen Krebsprogramm für die Schweiz, 2011–2015“ von 2012; s. <http://www.oncosuisse.ch>)

---

BMI-Kategorie

---

|                                |                              |
|--------------------------------|------------------------------|
| $< 18,5 \text{ kg/m}^2$        | Untergewicht                 |
| $18,5 - < 25,0 \text{ kg/m}^2$ | Normalgewicht                |
| $25,0 - < 30,0 \text{ kg/m}^2$ | Übergewicht (Prä-Adipositas) |
| $30,0 - < 35,0 \text{ kg/m}^2$ | Adipositas Grad I            |
| $35,0 - < 40,0 \text{ kg/m}^2$ | Adipositas Grad II           |
| $\geq 40,0 \text{ kg/m}^2$     | Adipositas Grad III          |

---

**Tab. 7.2:** BMI-Kategorien nach den Festlegungen der *World Health Organization* (WHO). Als Prä-Adipositas bezeichnet man ein leichtes Übergewicht, die Vorstufe zur Fettleibigkeit (Adipositas).

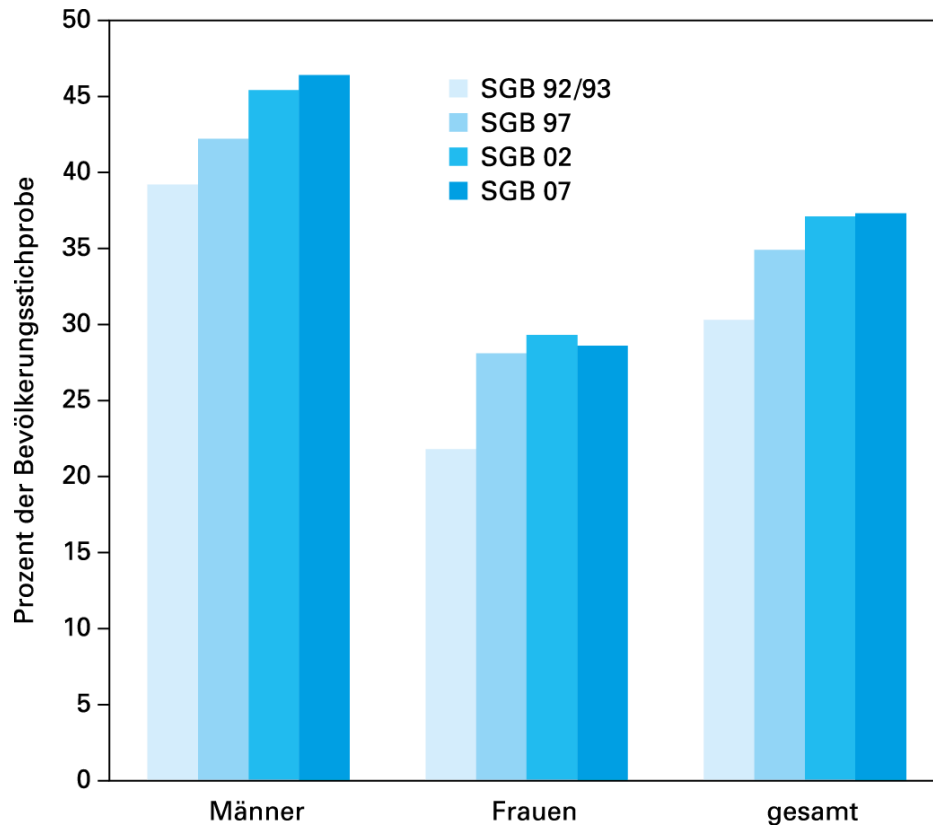

**Abb. 7.4:** Prozentsatz der übergewichtigen Erwachsenen ( $\text{BMI} \geq 25 \text{ kg/m}^2$ ; Alter:  $>15$  Jahre) in der Schweiz. Die Zahlen beziehen sich auf die Schweizerische Gesundheitsbefragungen (SGB) der Jahre 1992/93, 1997, 2002 und 2007 (Quelle: Schweizerische Gesundheitsbefragung 2007, OBSAN und BFS).



- 
- verminderte Insulinsensitivität des Gewebes, Diabetes mellitus Typ 2
  - Bluthochdruck, Herz-Kreislauf-Erkrankungen (Herzinsuffizienz, Arrhythmien, Varikosis, Lungenembolie, Schlaganfall)
  - Fettstoffwechselstörung (Dyslipidämie)
  - Erkrankungen des Bewegungsapparates (v. a. Arthrose, Osteoporose)
  - Komplikationen im Atmungssystem (z. B. Schlaf-Apnoe-Syndrom, Asthma bronchiale)
  - Magen-Darm-Erkrankungen (Gastritis, Ulkus, Magenkarzinom, Pylorospasmus, Gallensteinleiden, NAFLD [Non alcoholic fatty liver disease])
  - erhöhtes Risiko für die Entwicklung bestimmter bösartiger Tumore (Kolon-, Rektum- und Prostatakarzinome bei Männern und Uterus-, Ovarial- und Mammakarzinome sowie Karzinome der ableitenden Gallenwege bei Frauen)
  - Niereninsuffizienz
  - Infertilität, Sexualitätsstörungen (Impotenz und Unfruchtbarkeit, Hypogonadismus)
  - Chronische Infekte
- 

**Tab. 7.3:** Wichtige Begleit- und Folgeerkrankungen von Übergewicht und Adipositas.

**Abb. 7.5:** Die Standard Mortality Ratios (SMRs) vergleichen die Mortalität von PatientInnen mit Diabetes mellitus mit der der Gesamtbevölkerung. In der Schweiz zeigte sich in den letzten Jahren für beide Diabetestypen sowohl ein Rückgang bei der Gesamtsterblichkeit als auch bei der kardiovaskulären Sterblichkeit. (a) Gesamtmortalität bei Männern und Frauen mit Diabetes mellitus Typ 1 (b) Gesamtmortalität bei Männern und Frauen mit Diabetes mellitus Typ 2 (c) Kardiovaskuläre Mortalität bei Männern und Frauen mit Diabetes mellitus Typ 1 (d) Kardiovaskuläre Mortalität bei Männern und Frauen mit Diabetes mellitus Typ 2 (Quelle: Allemann S, Long-term cardiovascular and non-cardiovascular mortality in women and men with type 1 and type 2 diabetes mellitus: a 30-year follow-up in Switzerland, *Swiss Medical Weekly*, 2009; 139: 576–583).

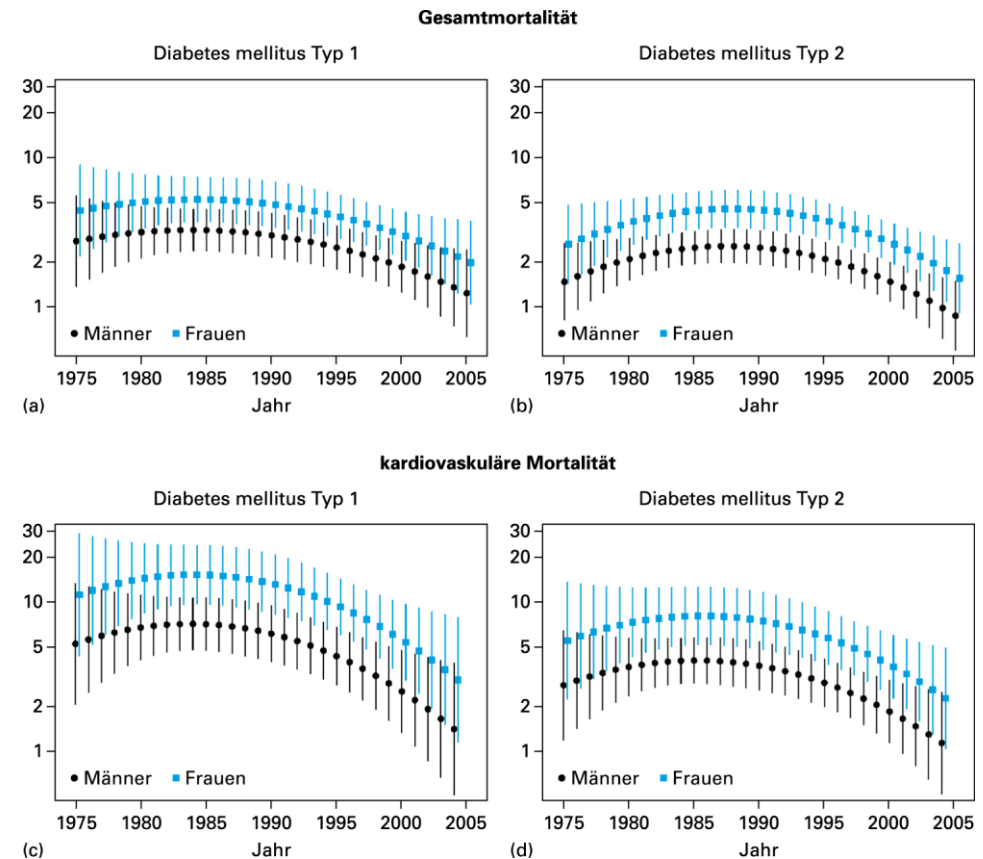

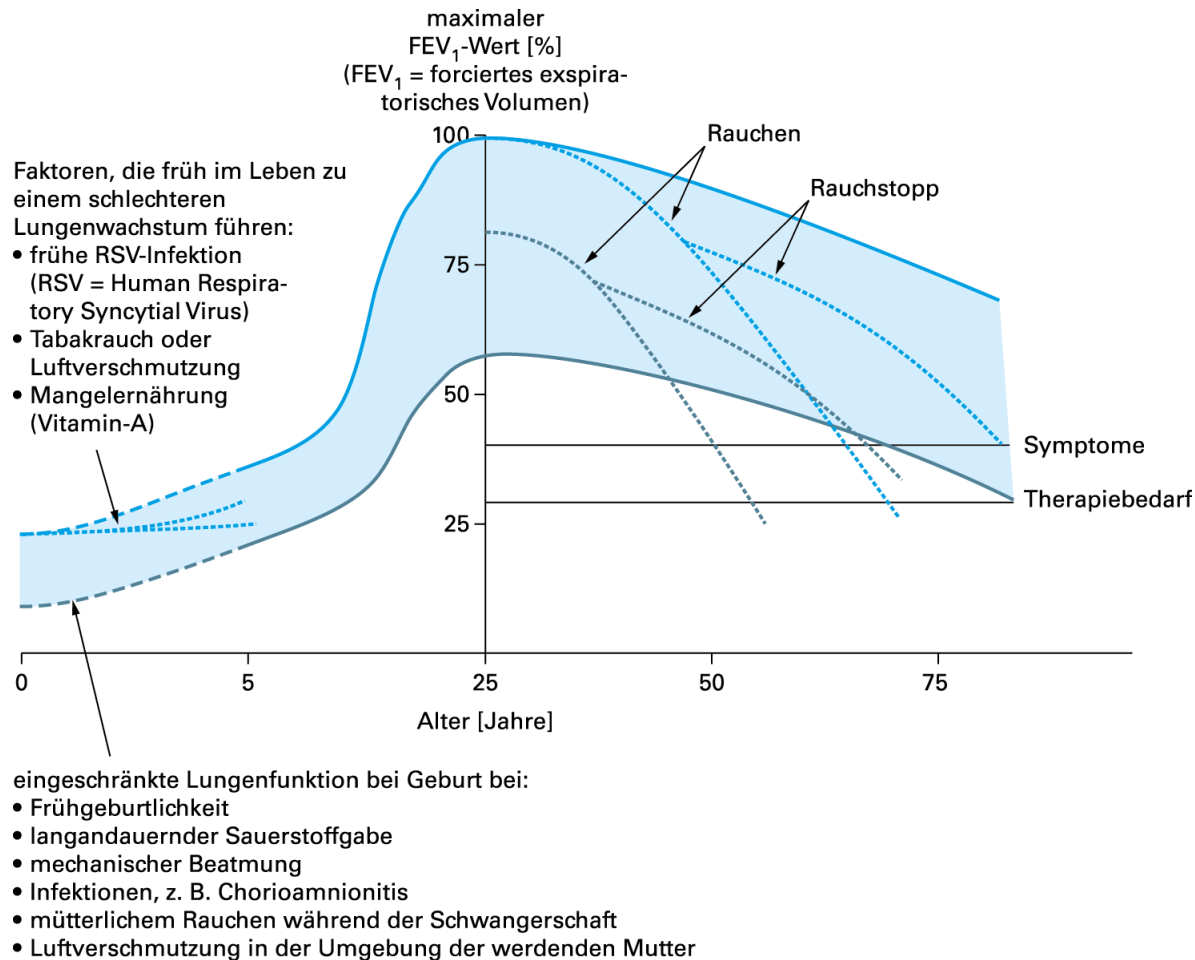

**Abb. 7.6:** Schematische Darstellung der Lungenfunktion im Lauf des Lebens (Quelle: modifiziert nach Baraldi E, Filippone M. Chronic Lung Disease after Premature Birth. The New England Journal of Medicine 2007; 357: 1946–1955).

|                                     | 12-Monats-Prävalenz in % |             |             |
|-------------------------------------|--------------------------|-------------|-------------|
|                                     | Gesamt                   | Männer      | Frauen      |
| <b>Art der Störung nach DSM-IV</b>  |                          |             |             |
| Substanzstörung                     | 4,5                      | 7,2         | 1,7         |
| Alkohol Missbrauch/Abhängigkeit     | 4,1                      | 6,8         | 1,3         |
| Drogen Missbrauch/Abhängigkeit      | 0,7                      | 1,0         | 0,5         |
| Psychose <sup>a</sup>               | 2,6                      | 2,6         | 2,5         |
| Affektive Störung                   | 11,9                     | 8,5         | 15,4        |
| unipolare Depression <sup>b</sup>   | 10,7                     | 7,5         | 14,0        |
| Bipolare Störung                    | 0,8                      | 0,6         | 1,1         |
| Angststörung                        | 14,5                     | 9,2         | 19,8        |
| Panikstörung                        | 2,3                      | 1,7         | 3,0         |
| Phobie                              | 12,6                     | 7,5         | 17,7        |
| Generalisierte Angststörung         | 1,5                      | 1,0         | 2,1         |
| Zwangsstörung                       | 0,7                      | 0,6         | 0,9         |
| somatoforme Störung <sup>c</sup>    | 11,0                     | 7,1         | 15,0        |
| Essstörung <sup>d</sup>             | 0,3                      | 0,2         | 0,5         |
| <i>Eine der genannten Störungen</i> | <i>31,1</i>              | <i>25,3</i> | <i>37,0</i> |

<sup>a</sup> weitere Definition (Screeningdiagnose), die über die Schizophreniediagnose hinausreicht

<sup>b</sup> Major Depression, Dysthymie

<sup>c</sup> Somatisierungsstörung, Hypochondrie, Schmerzstörung, undifferenzierte somatoforme Störung

<sup>d</sup> Anorexie, Bulimie

**Tab. 7.4:** Häufigkeit psychischer Störungen in Deutschland, dargestellt anhand der 12-Monats-Prävalenz. Da bei einer Person auch mehrere psychische Störungen gleichzeitig auftreten können (Komorbidität), kann die Summe innerhalb einer Störungsgruppe >100 % sein. N = 4.181 (Quelle: Bundesgesundheitsurvey, 1998).

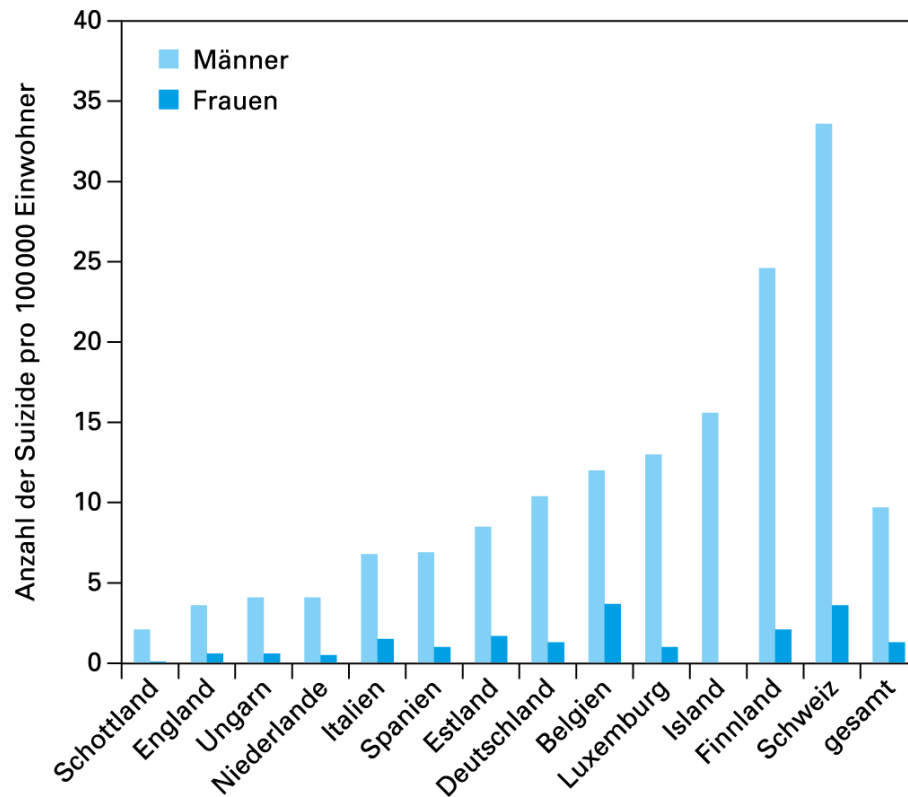

**Abb. 7.7:** Anzahl der mit Schusswaffen verübten Suizide pro 100.000 Einwohner in verschiedenen europäischen Ländern (Quelle: European Alliance Against Depression, 2004).

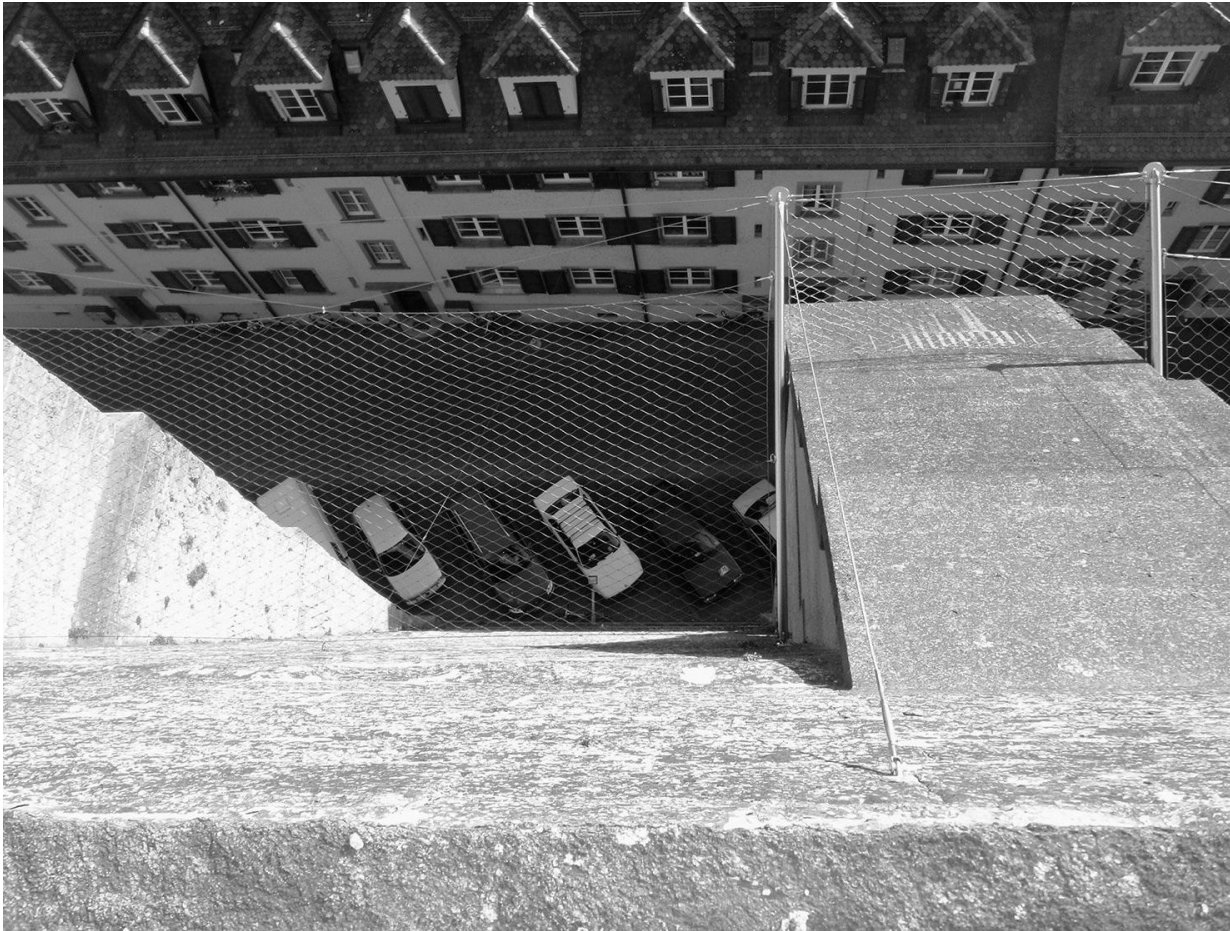

**Abb. 7.8:** Sprungnetze zur Suizidprävention an der Berner Münsterplattform (Quelle: J. Barth).

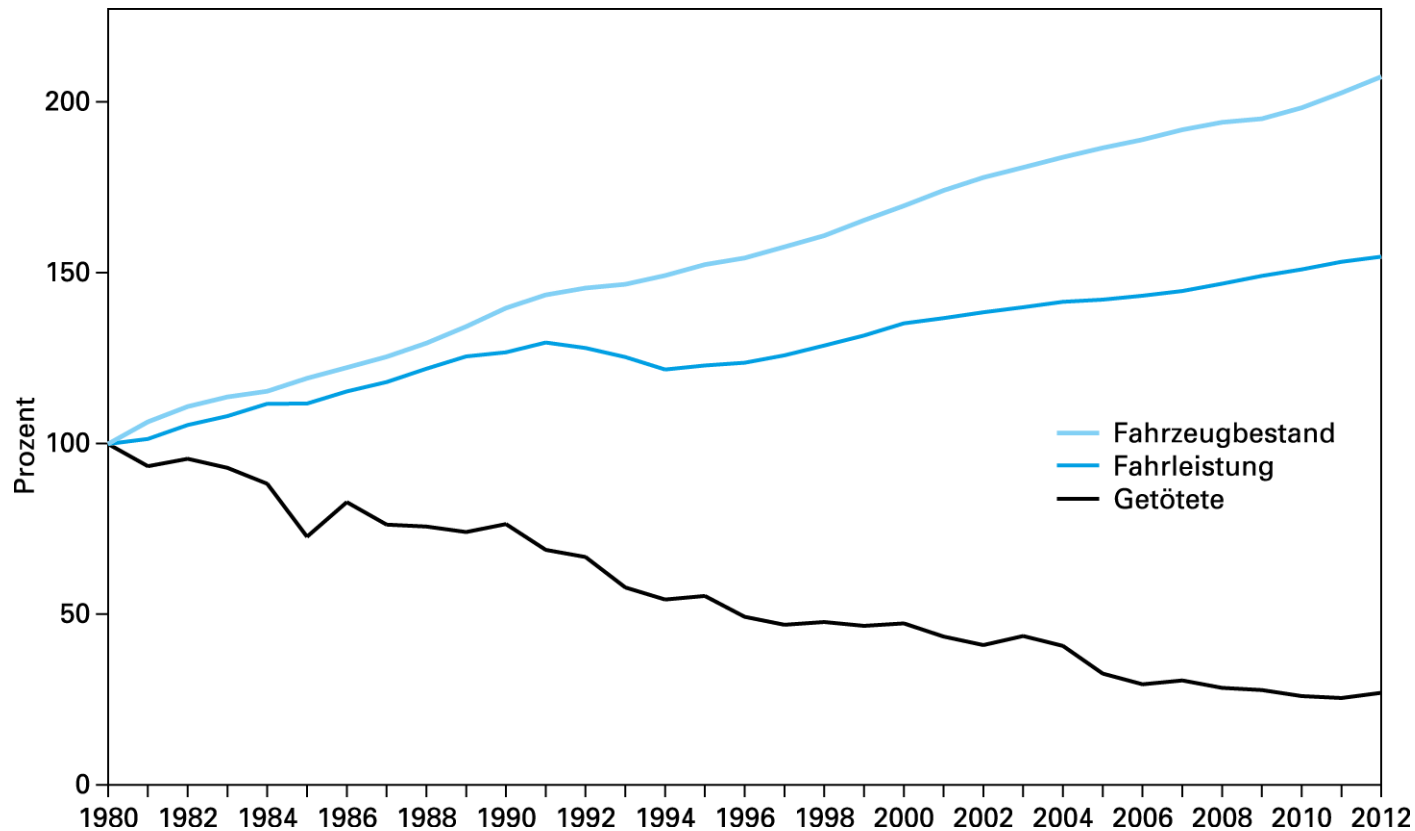

**Abb. 7.9:** Anzahl der Getöteten im Straßenverkehr im Verhältnis zur Fahrleistung (gefahrte Strecke) des motorisierten Verkehrs und zum Fahrzeugbestand im Zeitraum 1980–2012 in der Schweiz (Quelle: bfu, BFS).



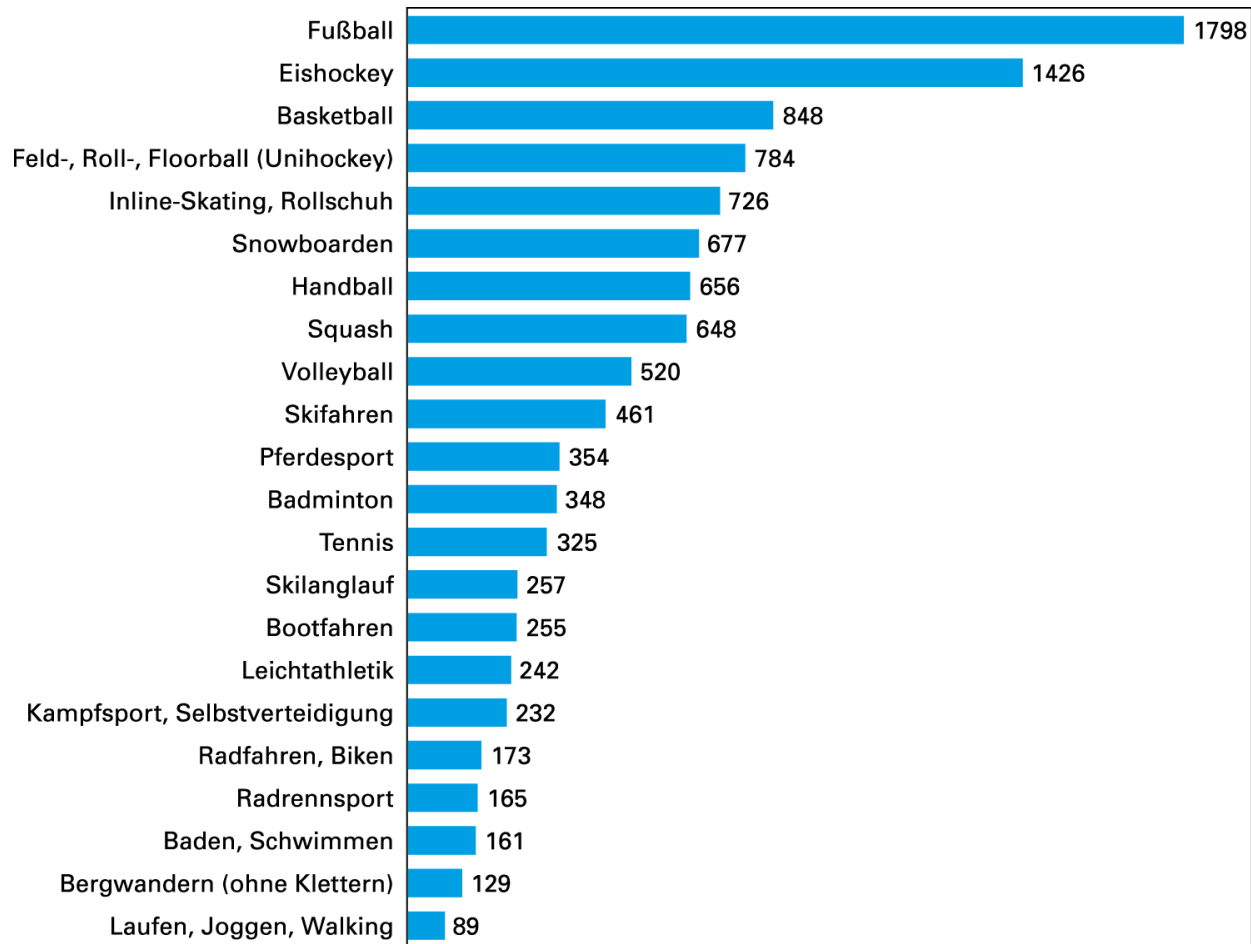

**Abb. 7.10:** Verletzte beim Sport pro 1 Mio. ausgeübte Stunden. Die Zahlen beziehen sich auf die erwerbstätige Schweizer Wohnbevölkerung (2008) (Quelle: Observatorium Sport und Bewegung Schweiz; [www.sportobs.ch](http://www.sportobs.ch)).



|                         | Mensch<br>(Verhaltensprävention)                                     | Überträger, hier: Feuer<br>(Verhaltens-/ Verhältnissprävention)                      | Umwelt<br>(Verhältnisprävention)                                                                                       |
|-------------------------|----------------------------------------------------------------------|--------------------------------------------------------------------------------------|------------------------------------------------------------------------------------------------------------------------|
| Vor dem Ereignis        | Ausbildung von Kindern und Eltern zum Brandschutz                    | Kindersichere Behälter für brennbare Flüssigkeiten<br>Kindersicherung für Feuerzeuge | Vorschriften und Empfehlungen zur Nutzung schwer entflammbarer Materialien beim Hausbau und in der Wohnungseinrichtung |
| Während des Ereignisses | Verhaltenstraining für einen Brandfall (Alarmieren, Retten, Löschen) | Tragen schwer entflammbarer Kinderkleidung                                           | Rauchmelder<br>Sprinkleranlagen<br>Kennzeichnung von Fluchtwegen                                                       |
| Nach dem Ereignis       | Ausbildung in Erster Hilfe für Brandverletzungen                     | Behandlung und Rehabilitation in medizinischer Einrichtung für Brandverletzungen     | Sicherstellung kurzer Alarmzeiten für Feuerwehr                                                                        |

**Tab. 7.5:** Haddon-Matrix (modifiziert): Interventionen zur Prävention von Brandverletzungen bei Kindern (Quelle: In Anlehnung an Stevenson M, Shanti A, McClure R. The Rationale for Prevention. In: McClure R, Stevenson M, McEvoy S (Hrsg.) The Scientific Basis of Injury Prevention and Control, Victoria, Aus: IP Communications; 2004: 34– 43).

|                                  |                                                                                                                                                                                                                                                                                             |
|----------------------------------|---------------------------------------------------------------------------------------------------------------------------------------------------------------------------------------------------------------------------------------------------------------------------------------------|
| <b>Ansteckung</b>                | Kontakt, Etablierung und Vermehrung des Infektionserregers im Wirt.                                                                                                                                                                                                                         |
| <b>Inkubationszeit</b>           | Zeitintervall zwischen der Ansteckung und dem Auftreten erster Symptome, z. B. durch erste Vermehrung des Erregers an der Eintrittspforte und anschließende Dissemination (Streuung) über die Blutbahn zum Zielorgan (s. Web-Abb. 8.1.1 auf unserer Lehrbuch-Homepage).                     |
| <b>Krankheit</b>                 | Zeitraum, der durch das Vorhandensein von Symptomen gekennzeichnet ist.                                                                                                                                                                                                                     |
| <b>Asymptomatische Infektion</b> | Infektion, die bei einem Menschen keine Symptome verursacht. Asymptomatische Infektionen können epidemiologisch wichtig sein, da Infizierte als Quelle für die Weiterverbreitung der Infektion in Frage kommen können.                                                                      |
| <b>Ausscheidungsphase</b>        | Zeitspanne, während der der Infektionserreger übertragbar ist. Sie korreliert häufig mit der Krankheitsphase. Beispiel für wichtige Ausnahmen hiervon sind Hepatitis A-, Varizellen-, Influenza-, Parvovirus B19- und HIV-Infektionen.                                                      |
| <b>Elimination</b>               | Der Erreger wird durch das Abwehrsystem (und evtl. die Therapie) unschädlich gemacht.                                                                                                                                                                                                       |
| <b>Immunität</b>                 | Unempfindlichkeit gegenüber dem Erreger: Der Wirt kann nicht (mehr) angesteckt werden, bzw. es kommt zu einer epidemiologisch bedeutungslosen abortiven Infektion, die zu keiner weiteren Erregerübertragung führt.                                                                         |
| <b>Kolonisation</b>              | Vermehrung von Erregern (Bakterien, Pilze) auf Haut oder Schleimhäuten, ohne dass Krankheitssymptome auftreten. Die Kolonisation ist epidemiologisch wichtig, da durch diese die Möglichkeit der Übertragung der Erreger auf andere Personen besteht.                                       |
| <b>Latente Infektion</b>         | Andauernde Infektion ohne Krankheitssymptome und evtl. auch ohne Vermehrung des Erregers im Wirt. Von epidemiologischer Bedeutung sind latente Infektionen aufgrund ihres Reaktivierungspotentials: Sie können unter ungünstigen Bedingungen wieder zu klinisch aktiven Infektionen werden. |

**Tab. 8.1:** Die wichtigsten Begriffe zum zeitlichen Ablauf einer Infektionskrankheit.

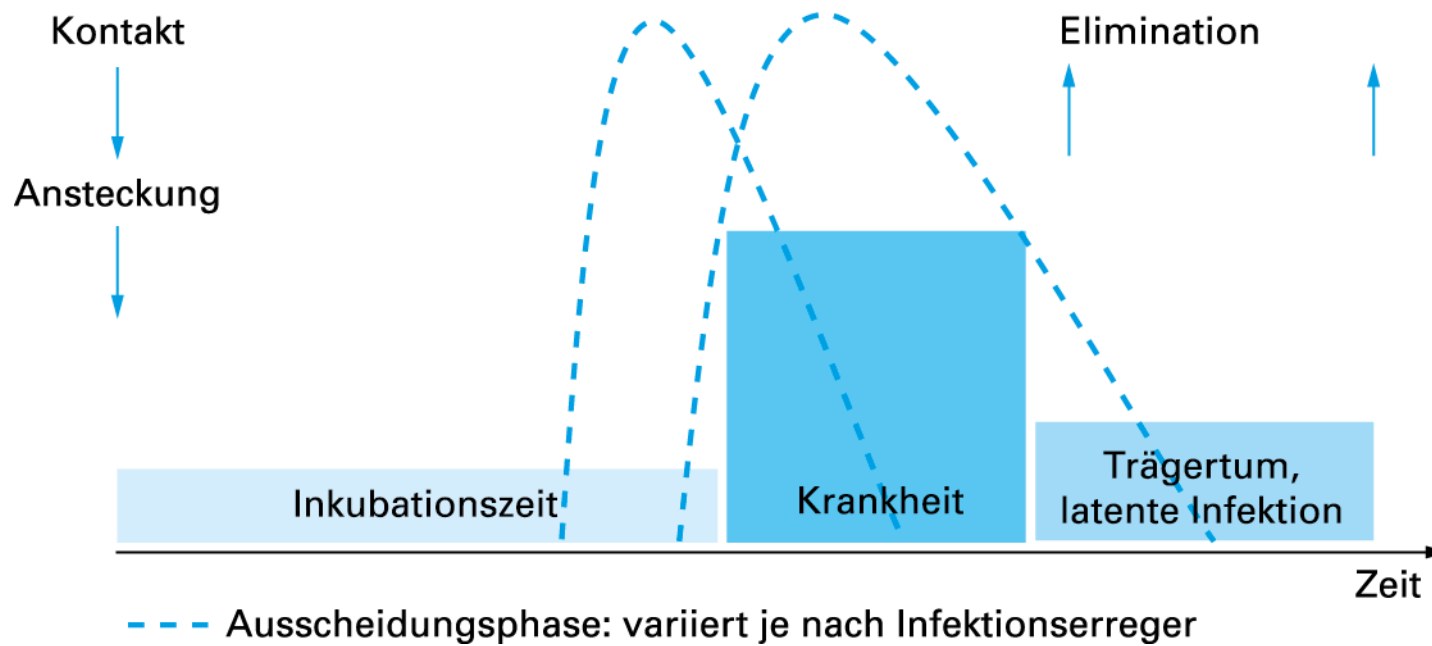

**Abb. 8.1:** Stadien einer Infektion.

**Tab. 8.2:** Übertragungswege von Infektionserregern.

| Übertragungsweg                      | Erreger, die auf diesem Weg übertragen werden                                                     |
|--------------------------------------|---------------------------------------------------------------------------------------------------|
| <b>Horizontale Übertragung</b>       |                                                                                                   |
| <b>DIREKT</b>                        |                                                                                                   |
| <i>Physischer Kontakt</i>            |                                                                                                   |
| Hände                                | Viele multiresistente Bakterien (z. B. MRSA), Durchfallerreger, Respiratory syncytial Virus (RSV) |
| Sexualkontakt                        | Erreger sexuell übertragbarer Infektionen [sexually transmitted infections (STI)]                 |
| <i>Aerogen</i>                       |                                                                                                   |
| Tröpfchen                            | Pneumokokken, Meningokokken, Gruppe A Streptokokken, respiratorische Viren (Influenza)            |
| Aerosol                              | Tuberkelbakterien, Varizella-Zoster-Virus, Masernvirus                                            |
| <b>INDIREKT</b>                      |                                                                                                   |
| <i>Vehikel (unbelebt)</i>            |                                                                                                   |
| Gegenstände                          | Multiresistente Keime, RSV                                                                        |
| Nahrung, Wasser                      | Salmonellen, Aspergillen                                                                          |
| Blut u. a. biologische Flüssigkeiten | HIV, Hepatitis-B-Viren, Hepatitis-C-Viren                                                         |
| Erde                                 | Erreger von Tetanus und Gasbrand                                                                  |
| <i>Vektor (belebt)</i>               |                                                                                                   |
| Mücken, Zecken etc.                  | Erreger von Malaria, Frühsommermeningoenzephalitis (FSME), Lyme Borreliose                        |
| <b>Vertikale Übertragung</b>         |                                                                                                   |
| Prä-, Perinatal                      | Zytomegalievirus, Rötelnvirus, Toxoplasma gondii etc.                                             |

Eine Erläuterung hierzu: Die aerogene Übertragung geht in der Regel von den Sekreten der Atemwege aus.

(1) *Tröpfchen*: Während wir sprechen, husten, niesen, singen etc. werden Sekrettröpfchen, die einen Durchmesser von  $\leq 5$  mm haben, in die Luft entlassen. Diese fallen aufgrund ihrer Größe nach 1–2 m Entfernung auf den Boden. Beim Einatmen gelangen sie nur bis in die oberen Atemwege.

(2) *Aerosol*: Durch das Verdampfen der Tröpfchen entstehen Tröpfchenkerne (Durchmesser  $< 5$   $\mu$ m), welche aufgrund ihrer geringen Größe schweben und über weite Distanzen übertragen werden können. Beim Einatmen gelangen Aerosole bis in die unteren Atemwege. Nur wenige Infektionserreger können im geringen Feuchtigkeitsgehalt eines Aerosols überleben.

**Tab. 8.3:** Die wichtigsten Begriffe zur Übertragungsdynamik von Infektionserregern in einer Population.

|                                       |                                                                                                                                                                                                                                                                                                                                                                                                                                                                                                                                                                                                                                                                                                                                                        |        |      |                         |       |                         |      |     |      |
|---------------------------------------|--------------------------------------------------------------------------------------------------------------------------------------------------------------------------------------------------------------------------------------------------------------------------------------------------------------------------------------------------------------------------------------------------------------------------------------------------------------------------------------------------------------------------------------------------------------------------------------------------------------------------------------------------------------------------------------------------------------------------------------------------------|--------|------|-------------------------|-------|-------------------------|------|-----|------|
| <b>Kontagiosität (Ansteckbarkeit)</b> | Maß für die Wahrscheinlichkeit, dass die Übertragung eines Erregers stattfindet. Sie ist abhängig vom Übertragungsweg (s. Tab. 8.1.2) sowie den biologischen Merkmalen des Infektionserregers (z. B. Adhärenzfaktoren) und des Wirtes (z. B. Rezeptoren).                                                                                                                                                                                                                                                                                                                                                                                                                                                                                              |        |      |                         |       |                         |      |     |      |
| <b>Populationsdichte</b>              | Anzahl der Personen pro Fläche (km <sup>2</sup> ). Enges Zusammenleben auf kleinem Raum wird auch als „Crowding“ bezeichnet. Die Populationsdichte beeinflusst die Geschwindigkeit, mit der sich ein Infektionserreger ausbreiten kann. Sie korreliert in der Regel invers mit dem Wohlstand einer Population.                                                                                                                                                                                                                                                                                                                                                                                                                                         |        |      |                         |       |                         |      |     |      |
| <b>Durchmischung einer Population</b> | Menschliche Populationen mischen sich in der Regel nicht homogen, sie gruppieren sich z. B. nach Interessensgemeinschaft, sozialer Schichtung, Verhalten usw. Dies kann auch das Übertragungsmuster einer Infektionskrankheit beeinflussen. Beispiel: Sexuell-übertragene Infektionen bei Personen mit besonderem Sexualverhalten, Masernausbruch in Gemeinschaften von Impfgegnern                                                                                                                                                                                                                                                                                                                                                                    |        |      |                         |       |                         |      |     |      |
| <b>Reproduktionsrate</b>              | Die Reproduktionsrate beschreibt hier die Anzahl an neuen Infektionen, die von einem Fall ausgehen (s. Abb. 8.3).                                                                                                                                                                                                                                                                                                                                                                                                                                                                                                                                                                                                                                      |        |      |                         |       |                         |      |     |      |
| <b>Basale <math>R_0</math></b>        | Die basale Reproduktionsrate ( $R_0$ ) bezieht sich auf eine Population, in der alle Mitglieder für die Infektion empfänglich sind. Sie wird durch die Kontagiosität, die Populationsdichte und die Durchmischung einer Population bestimmt. In verschiedenen Populationen kann die basale Reproduktionsrate deshalb für denselben Erreger unterschiedliche Werte annehmen.<br><i>Beispiele für <math>R_0</math></i><br><table> <tr> <td>Masern</td><td>5–18</td></tr> <tr> <td>Keuchhusten (Pertussis)</td><td>10–18</td></tr> <tr> <td>Windpocken (Varizellen)</td><td>7–14</td></tr> <tr> <td>HIV</td><td>2–12</td></tr> </table>                                                                                                                   | Masern | 5–18 | Keuchhusten (Pertussis) | 10–18 | Windpocken (Varizellen) | 7–14 | HIV | 2–12 |
| Masern                                | 5–18                                                                                                                                                                                                                                                                                                                                                                                                                                                                                                                                                                                                                                                                                                                                                   |        |      |                         |       |                         |      |     |      |
| Keuchhusten (Pertussis)               | 10–18                                                                                                                                                                                                                                                                                                                                                                                                                                                                                                                                                                                                                                                                                                                                                  |        |      |                         |       |                         |      |     |      |
| Windpocken (Varizellen)               | 7–14                                                                                                                                                                                                                                                                                                                                                                                                                                                                                                                                                                                                                                                                                                                                                   |        |      |                         |       |                         |      |     |      |
| HIV                                   | 2–12                                                                                                                                                                                                                                                                                                                                                                                                                                                                                                                                                                                                                                                                                                                                                   |        |      |                         |       |                         |      |     |      |
| <b>Effektive R</b>                    | Die effektive Reproduktionsrate berechnet man für eine Population, in der nicht alle Mitglieder für die Infektion empfänglich sind. $R \leq R_0$<br>Wenn $R > 1$ , dann nimmt die Anzahl der Infektionsfälle zu.<br>Wenn $R = 1$ , dann bleibt die Anzahl der Infektionsfälle konstant.<br>Wenn $R < 1$ , dann nimmt die Anzahl der Infektionsfälle ab.<br>Im Verlauf einer Epidemie (s. Kap. 8.1.3) ist $R$ zu Beginn $> 1$ . Je mehr Personen der exponierten Population die Infektion durchlebt haben, desto stärker sinkt die Anzahl der für die Infektion empfänglichen Personen. Ist dann der kritische Punkt erreicht, bei dem nur noch wenige empfängliche Personen zur Verfügung stehen, sinkt $R < 1$ und die Epidemie kommt zum Stillstand. |        |      |                         |       |                         |      |     |      |
| <b>„Superspreader“</b>                | Einige Individuen zeichnen sich durch ein überdurchschnittlich hohes $R_0$ bzw. $R$ aus. Dabei spielen bislang unbekannte biologische Merkmale und/oder ein besonderes Verhalten eine Rolle. So war z. B. im Februar 2002 ein einziger Patient in Hongkong für den Beginn der SARS-Epidemie verantwortlich, der in einem Hotel mindestens 10 Personen ansteckte (durchschnittliche $R_0$ für SARS: 2–3).                                                                                                                                                                                                                                                                                                                                               |        |      |                         |       |                         |      |     |      |
| <b>Herdenimmunität</b>                | Als Herdenimmunität ( <i>Herd Immunity</i> ) bezeichnet man einen Effekt innerhalb einer Population (der „Herde“), der dann entsteht, wenn dort eine durch Impfung erzeugte oder durch Infektion erworbene Immunität gegen einen Krankheitserreger so weit verbreitet ist, dass in der Population auch nicht-immune Personen geschützt sind, da der Erreger sich nicht weiter ausbreiten kann.                                                                                                                                                                                                                                                                                                                                                         |        |      |                         |       |                         |      |     |      |

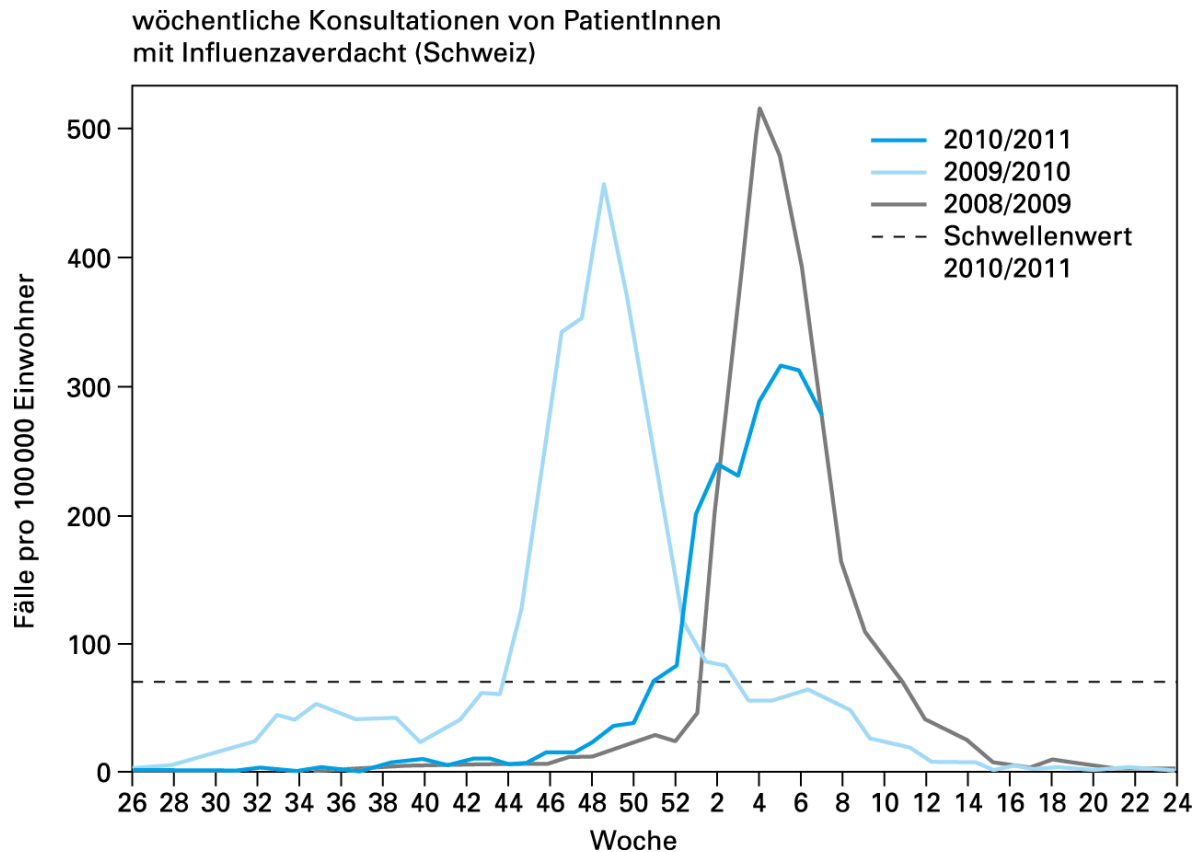

**Abb. 8.2:** Epidemiekurven der saisonalen Influenzaepidemien in der Schweiz in den Zeiträumen 2008/2009, 2009/2010 und 2010/2011. Dargestellt ist die Zahl der wöchentlichen ärztlichen Konsultationen von PatientInnen mit Influenzaverdacht. Eingezeichnet ist darüber hinaus der errechnete saisonale Influenza-Schwellenwert für den Zeitraum 2010/2011 (Quelle: Bundesamt für Gesundheit BAG).

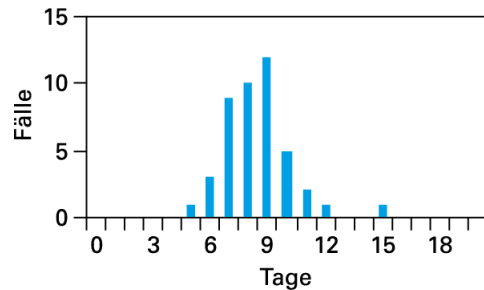

#### Common source-Epidemie mit Punktquelle

*Beispiel: Kartoffelsalat bei einem Büffet.*

Die Zeit zwischen der Exposition (Tag 0 = Büffet) und dem Gipfel der Epidemie (Tag 9) entspricht der durchschnittlichen Inkubationszeit.

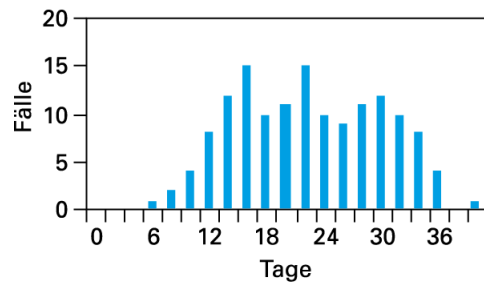

#### Propagierte Epidemie

*Beispiel: Kinderkrankheiten wie Röteln, Masern*

Ein Indexfall (Tag 0, erster Fall und Ausgangspunkt der Epidemie) führt zu einer ersten Welle von Fällen. Diese stecken weitere Personen an, was zu einer zweiten (und evtl. dritten Welle etc.) führt. Ein solches Bild wird bei Infektionskrankheiten beobachtet, die direkt von Person zu Person übertragen werden und hoch kontagiös sind. Die Inkubationszeit ergibt sich aus der Zeitdifferenz zwischen dem Indexfall und dem Gipfel der ersten Welle bzw. zwischen den Gipfeln zweier Wellen.

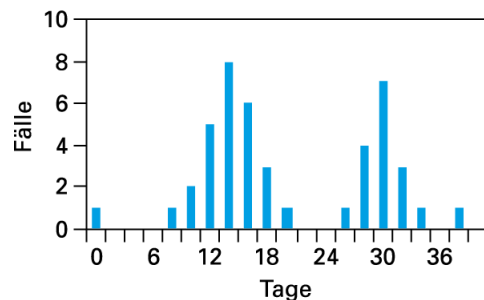

#### Common source-Epidemie mit verlängerter Exposition

*Beispiele: kontaminierte Wasserquelle*

Ist eine Ansteckungsquelle über längere Zeit aktiv, so ergibt sich eine langgestreckte Kurve. Jedoch kann bei bekanntem Erreger die aus der Literatur ersichtliche durchschnittliche Inkubationszeit bei der Identifikation der Quelle behilflich sein. Die Quelle musste zur Zeit des ersten Falles abzüglich der kürzesten Inkubationszeit bereits aktiv gewesen sein.

**Abb. 8.3:** Beispiele verschiedener Epidemiekurven (Quelle: Bundesamt für Gesundheit BAG).

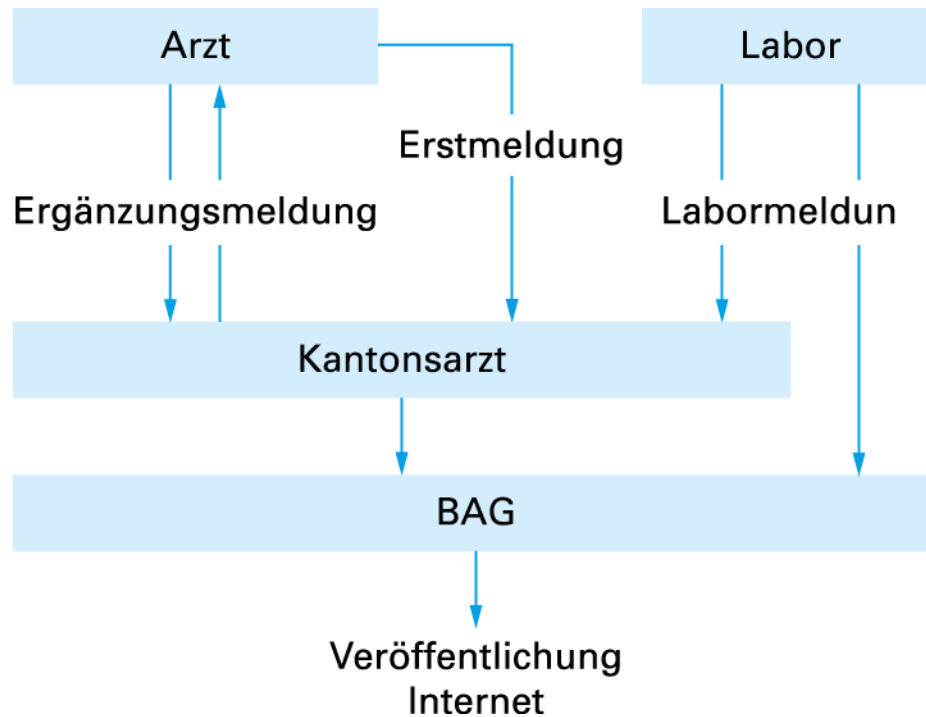

**Abb. 8.4:** Meldeablauf bei einer meldepflichtigen Infektionskrankheit in der Schweiz. Die Daten laufen beim Bundesamt für Gesundheit (BAG) zusammen, wo sie erfasst, analysiert und schließlich veröffentlicht werden. (Quelle: modifiziert nach Bundesamt für Gesundheit (BAG), Schweiz).



# Malariaprophylaxe 2013

Empfehlungen des "Expertenkomitee für Reisemedizin" (EKR/Schweiz).

- 1.) Mückenschutzmassnahmen werden in allen Malariagebieten empfohlen, auch in Regionen\* mit minimalem Übertragungsrisiko.
- 2.) Eine medikamentöse Prophylaxe und/oder das Mitnehmen einer Notfallselbstbehandlung werden je nach Reisedestination\* empfohlen.

\* Eine detaillierte Liste der Länder wird regelmässig im Bulletin des Bundesamtes für Gesundheit publiziert (Dokument: Reisemedizin - Impfungen und Malariaschutz bei Auslandsreisen [http://www.bag.admin.ch]).

|                       |                                                                                                                                                                                                                                                                                                      |
|-----------------------|------------------------------------------------------------------------------------------------------------------------------------------------------------------------------------------------------------------------------------------------------------------------------------------------------|
| P                     | Medikamentöse Prophylaxe mit Mefloquin <sup>MP</sup> (Lariam®/Mephaquin®), Malarone <sup>APP</sup> oder Doxycyclin <sup>DP</sup>                                                                                                                                                                     |
| P <sup>s</sup><br>(T) | Medikamentöse Prophylaxe ( <b>saisonal</b> ) mit Mefloquin <sup>MP</sup> (Lariam®/Mephaquin®), Malarone <sup>APP</sup> oder Doxycyclin <sup>DP</sup><br><b>Notfallselbstbehandlung</b> mit Riamet <sup>ALT</sup> oder Malarone <sup>APT</sup> in speziellen Situationen (vgl. Text im BAG-Bulletin*) |
| —<br>T                | <b>Keine</b> medikamentöse Prophylaxe empfohlen<br>Notfallselbstbehandlung mit Riamet <sup>ALT</sup> oder Malarone <sup>APT</sup>                                                                                                                                                                    |
| —<br>(T)              | <b>Keine</b> medikamentöse Prophylaxe empfohlen<br><b>Notfallselbstbehandlung</b> mit Riamet <sup>ALT</sup> oder Malarone <sup>APT</sup> in speziellen Situationen (vgl. Text im BAG-Bulletin*)                                                                                                      |
| —<br>CT               | <b>Keine</b> medikamentöse Prophylaxe empfohlen<br>Notfallselbstbehandlung mit Chloroquin <sup>CT</sup> (Nivaquine® oder Plaquenil®); auch Riamet <sup>ALT</sup> oder Malarone <sup>APT</sup> möglich.                                                                                               |

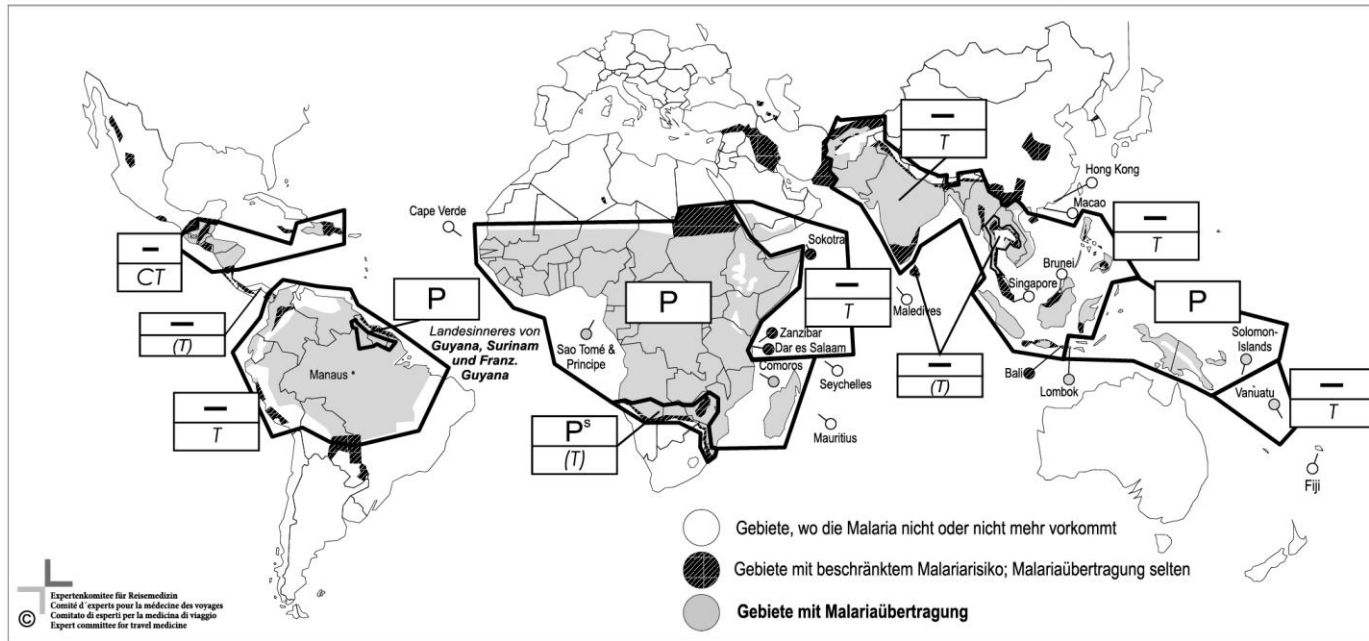

Angepasst nach: WHO International Travel and Health 2012

Vers. 3.2 / 2013-01 Swiss TPH, Basel/ B.R.Beck; Zentrum für Reisemedizin, Universität Zürich/ M. Funk

**Abb. 8.5:** Malariagebiete und die für 2013 empfohlene Prophylaxemöglichkeiten des Expertenkomitees für Reisemedizin (EKR/Schweiz) (Quelle: Beck, Tropenmedizin und Reisemedizin am Bellevue, Zürich).

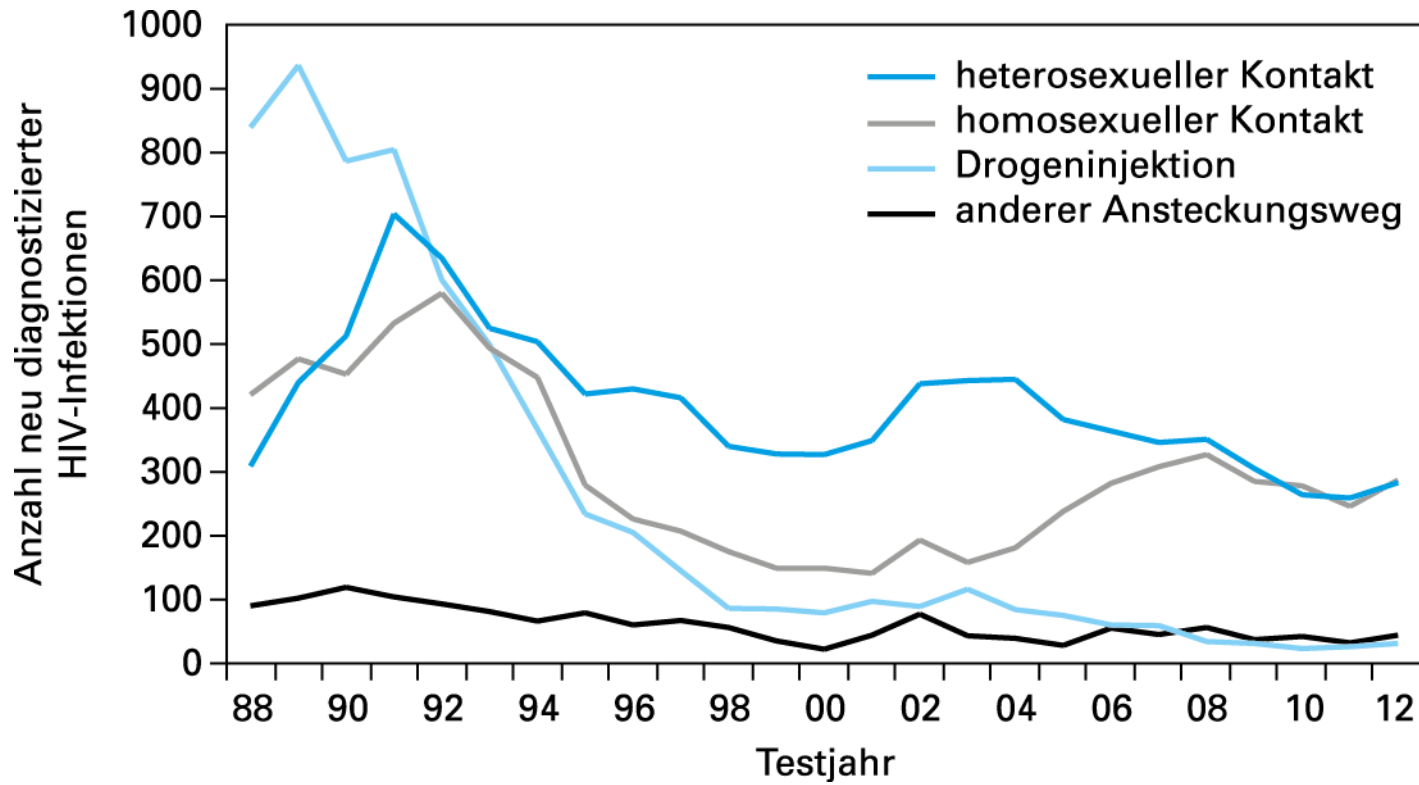

**Abb. 8.6:** Anzahl der neu diagnostizierten HIV-Infektionen in der Schweiz in den Jahren 1989 bis 2011, unterschieden nach verschiedenen Ansteckungswegen. Es handelt sich hierbei um statistische Schätzungen auf der Grundlage von Labor- und Arztmeldungen. (Quelle: Bundesamt für Gesundheit [BAG], Schweiz)

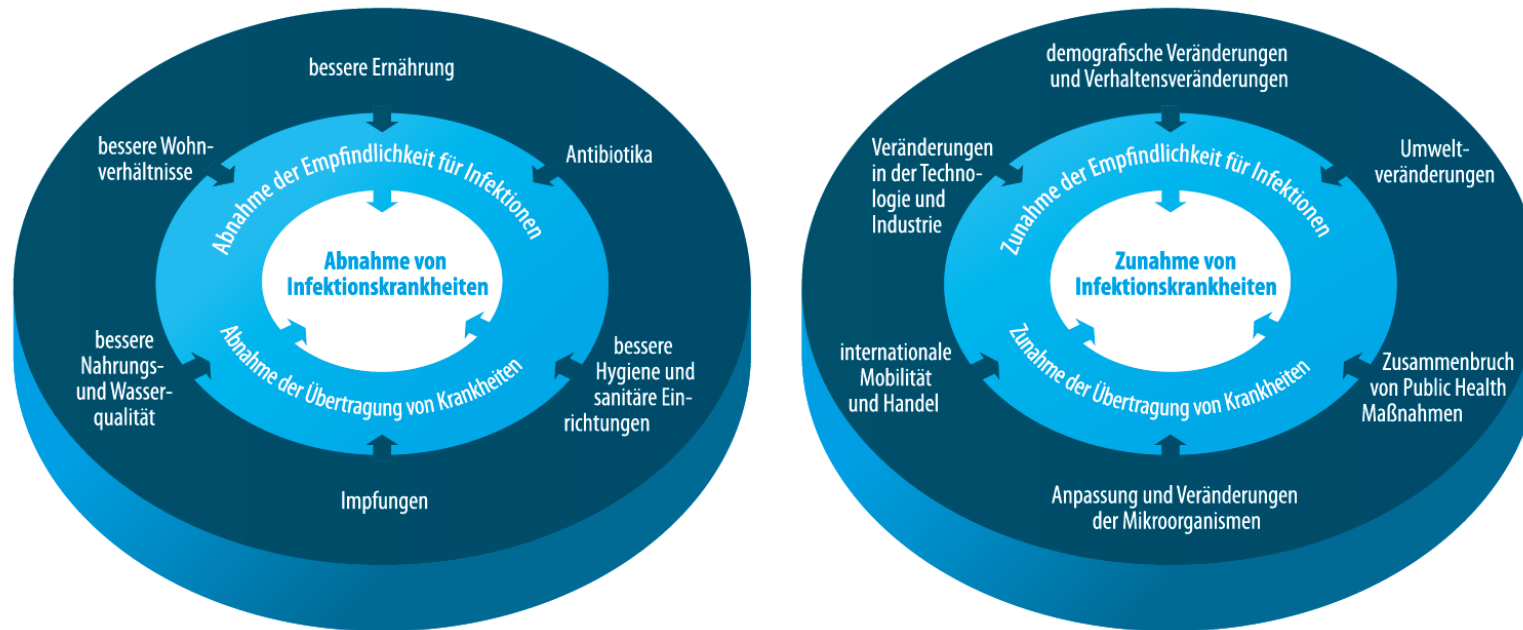

**Abb. 8.7:** Faktoren, die zu einer Ab- bzw. Zunahme von Infektionskrankheiten führen. Die Bedingungen, die zu einer Zunahme von Infektionskrankheiten führen, begünstigen das Auftreten von neuen Infektionskrankheiten (*Emerging Infections*). (Quelle: modifiziert nach Cohen ML. Changing patterns of infectious disease. Nature 2000; 406: 762–767)

**Abb. 8.8:** FSME-Risikogebiete in Deutschland (Stand: 2013) (a) (Quellen: [www.zecken.de](http://www.zecken.de)).

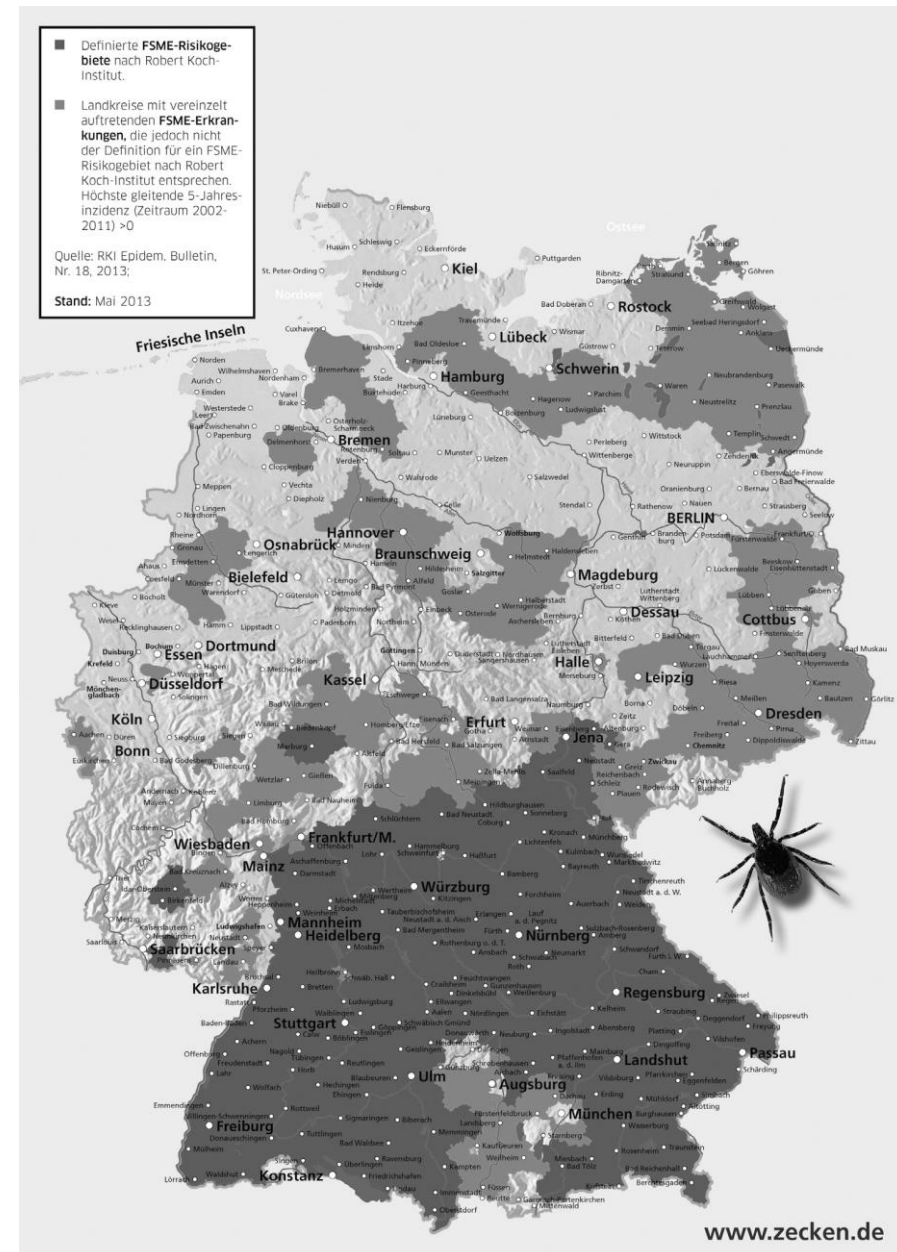

Zeckenenzephalitis (FSME) - Schweiz  
bekannte Endemiegebiete (Naturherde)

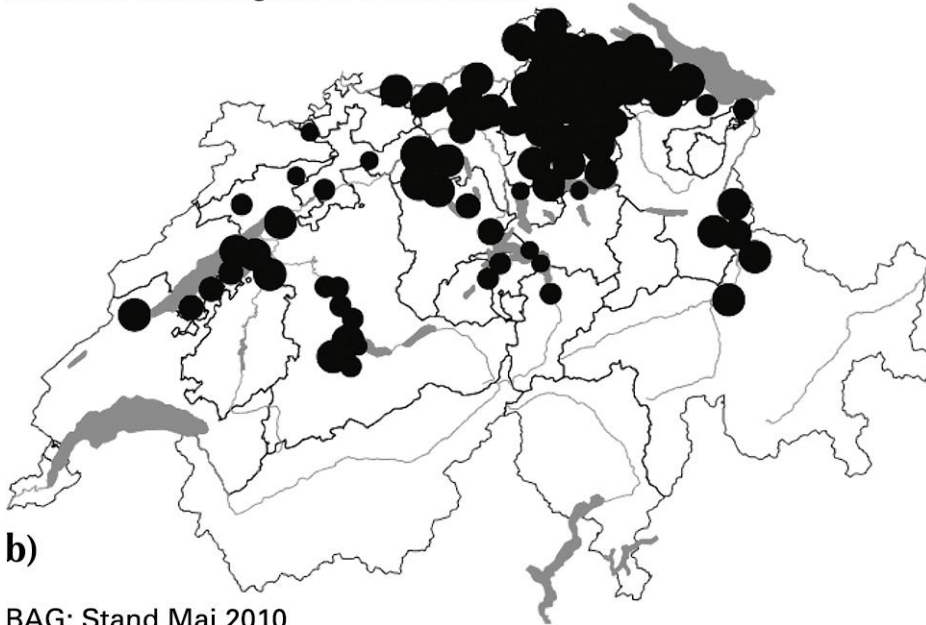

**Abb. 8.8:** FSME-Risikogebiete in der Schweiz (b) (Quellen: Bundesamt für Gesundheit BAG [www.bag.admin.ch/infekt](http://www.bag.admin.ch/infekt)).

|                         |                                                                                                                                                                                                                                                                                                                                                                                                                                                                                                                                                                                                                                                                                                                                                                                |
|-------------------------|--------------------------------------------------------------------------------------------------------------------------------------------------------------------------------------------------------------------------------------------------------------------------------------------------------------------------------------------------------------------------------------------------------------------------------------------------------------------------------------------------------------------------------------------------------------------------------------------------------------------------------------------------------------------------------------------------------------------------------------------------------------------------------|
| <b>Hygienemaßnahmen</b> | <p>Dies umfasst alle Handlungen und Maßnahmen, die das Risiko für eine nosokomiale Infektion sowie die Übertragung von Erregern einer Krankenhausinfektion vermindern. Hierzu gehören neben den Standardhygienemaßnahmen auch Hygienemaßnahmen bei Eingriffen am Patienten, prophylaktische Behandlungen (z.B. die perioperative Antibiotikaprophylaxe) und die Behandlung von Instrumenten, Gegenständen und Flächen. Im weiteren Sinne gehören dazu auch personalärztliche Betreuungsmaßnahmen, eine rationale Antibiotikapolitik, das Abklären von Epidemien sowie die Überwachung der Qualität von Lebensmitteln, Luft und Wasser.</p> <p>Die Hygienemaßnahmen müssen schriftlich in Form von Hygienerichtlinien dokumentiert sein und regelmäßig überarbeitet werden.</p> |
| <b>Schulung</b>         | <p>Hierzu gehört die in regelmäßigen Abständen stattfindende Information aller relevanten Berufsgruppen im Hinblick auf die Hygienerichtlinien.</p>                                                                                                                                                                                                                                                                                                                                                                                                                                                                                                                                                                                                                            |
| <b>Überwachung</b>      | <p>Ziel eines Überwachungsprogramms kann entweder die Ermittlung der Infektionsrate oder die Kontrolle von bestimmten Prozessen (z.B. Händehygiene compliance) sein. Infektionsraten können entweder durch Prävalenzstudien (z.B. Stichprobenerhebung in der ganzen Klinik in Bezug auf alle Infektarten) oder durch longitudinal-prospektive Studien (etwa im Hinblick auf chirurgische Wundinfektionen oder katheter-assoziierte Bakteriämien) ermittelt werden.</p>                                                                                                                                                                                                                                                                                                         |
| <b>Verbesserung</b>     | <p>Erkannte Mängel (z.B. eine zu hohe Infektrate) sollen im Rahmen von Verbesserungsprojekten soweit möglich korrigiert werden. Der Erfolg dieser Maßnahmen sowie seine Nachhaltigkeit müssen überwacht werden.</p>                                                                                                                                                                                                                                                                                                                                                                                                                                                                                                                                                            |

**Tab. 8.4:** Die wichtigen Pfeiler zur Kontrolle von Krankenhausinfektionen.



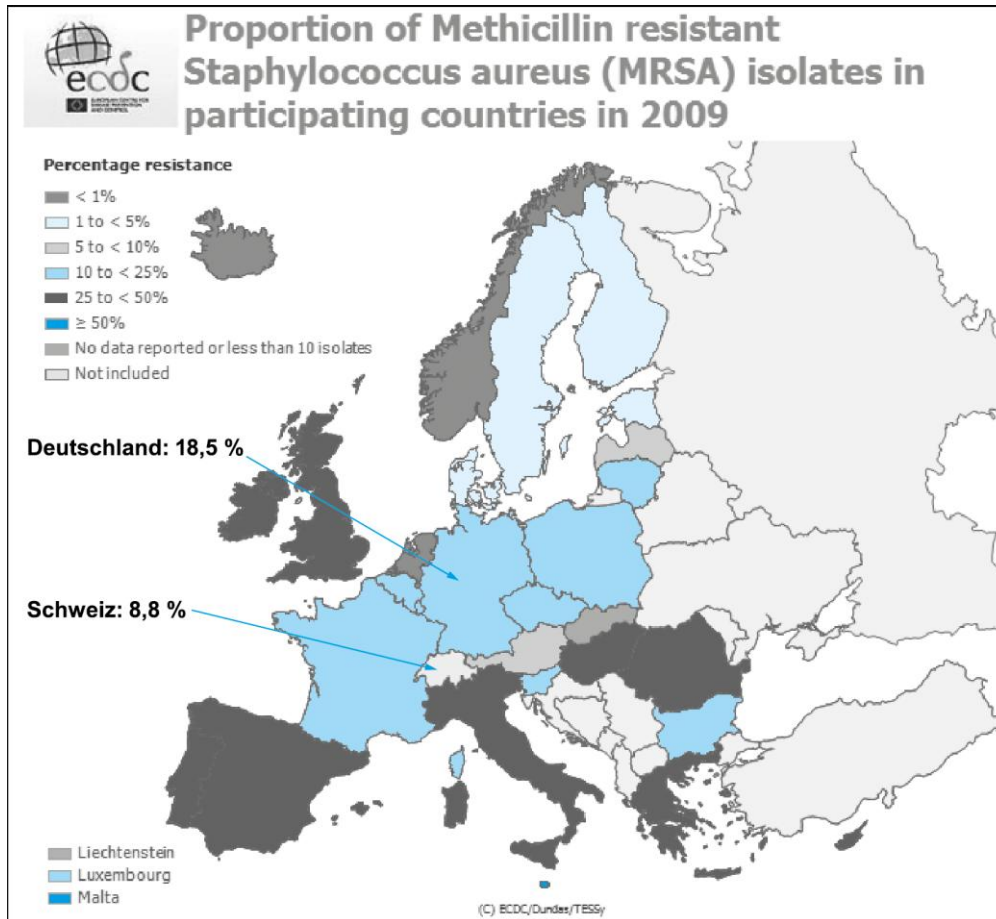

**Abb. 8.9:** Prävalenz der Methicillinresistenz bei *Staphylococcus aureus* in Europa im Jahr 2009. Die Überwachung der Antibiotikaresistenzen erfolgt in weiten Teilen Europas über das EARS Programm ([www.ecdc.europa.eu](http://www.ecdc.europa.eu)) und in der Schweiz über das nationale Programm ANRESIS ([www.anresis.ch](http://www.anresis.ch)). Die Werte für Deutschland und die Schweiz wurden ergänzt (Quelle modifiziert nach: European Centre for Disease Prevention and Control. Antimicrobial resistance surveillance in Europe 2009. Resistance Surveillance Network (EARS-Net). Stockholm: ECDC; 2010).

# IMPFKALENDER

Stand: August 2013  
Nach den Empfehlungen der Ständigen Impfkommission (STIKO)

| Empfohlenes<br>Impfalter              | Alter in Monaten              |                              |                   |                |                              | Alter in Jahren |                |     |                |                 |                 |
|---------------------------------------|-------------------------------|------------------------------|-------------------|----------------|------------------------------|-----------------|----------------|-----|----------------|-----------------|-----------------|
|                                       | 2                             | 3                            | 4                 | 11-14          | 15-23                        | 2-4             | 5-6            | 7-8 | 9-17           | ab 18           | ab 60           |
| Rotaviren <sup>a)</sup>               | G <sub>1</sub><br>ab 6 Wochen | G <sub>2</sub>               | (G <sub>3</sub> ) |                |                              |                 |                |     |                |                 |                 |
| Wundstarrkrampf (Tetanus)             | G <sub>1</sub>                | G <sub>2</sub>               | G <sub>3</sub>    | G <sub>4</sub> |                              | N               | A <sub>1</sub> | N   | A <sub>2</sub> |                 | A <sup>c)</sup> |
| Diphtherie                            | G <sub>1</sub>                | G <sub>2</sub>               | G <sub>3</sub>    | G <sub>4</sub> |                              | N               | A <sub>1</sub> | N   | A <sub>2</sub> |                 | A <sup>c)</sup> |
| Keuchhusten (Pertussis)               | G <sub>1</sub>                | G <sub>2</sub>               | G <sub>3</sub>    | G <sub>4</sub> |                              | N               | A <sub>1</sub> | N   | A <sub>2</sub> |                 | A <sup>d)</sup> |
| Kinderlähmung (Poliomyelitis)         | G <sub>1</sub>                | G <sub>2</sub> <sup>b)</sup> | G <sub>3</sub>    | G <sub>4</sub> |                              | N               |                |     | A <sub>1</sub> | ggf. N          |                 |
| Hepatitis B                           | G <sub>1</sub>                | G <sub>2</sub> <sup>b)</sup> | G <sub>3</sub>    | G <sub>4</sub> |                              | N               |                |     |                |                 |                 |
| Haemophilus<br>influenzae Typ b (Hib) | G <sub>1</sub>                | G <sub>2</sub> <sup>b)</sup> | G <sub>3</sub>    | G <sub>4</sub> |                              | N               |                |     |                |                 |                 |
| Pneumokokken                          | G <sub>1</sub>                | G <sub>2</sub>               | G <sub>3</sub>    | G <sub>4</sub> |                              | N               |                |     |                |                 |                 |
| Meningokokken                         |                               |                              |                   |                | G <sub>1</sub> <sup>e)</sup> |                 | N              |     |                |                 |                 |
| Masern, Mumps, Röteln (MMR)           |                               |                              |                   | G <sub>1</sub> | G <sub>2</sub>               |                 | N              |     |                | S <sup>g)</sup> |                 |
| Windpocken (Varizellen)               |                               |                              |                   | G <sub>1</sub> | G <sub>2</sub>               |                 | N              |     |                |                 |                 |
| Humane Papillomviren (HPV)            |                               |                              |                   |                |                              |                 |                |     |                | S <sup>h)</sup> |                 |
| Influenza                             |                               |                              |                   |                |                              |                 |                |     |                |                 | S <sup>i)</sup> |

G Grundimmunisierung

S Standardimpfung

A Auffrischung

N Nachholimpfung



S<sup>f)</sup>



S<sup>g)</sup>



S<sup>h)</sup>



S<sup>i)</sup>

■ G Grundimmunisierung ■ S Standardimpfung ■ A Auffrischung ■ N Nachholimpfung

a) Je nach Impfstoff 2 bzw. 3 Schluckimpfungen im Mindestabstand von je 4 Wochen; Impfung bevorzugt bis zur 16. bzw. 22. Lebenswoche, spätestens bis zur 24. bzw. 32. Woche abschließen.

b) Bei Einzelimpfstoffen kann diese Dosis entfallen.

c) Auffrischung alle 10 Jahre

d) Die nächste fällige Tetanus-Diphtherie-(Td)-Impfung soll einmalig mit einem Td-Pertussis bzw. Td-Pertussis-Poliomyelitis-Impfstoff erfolgen.

e) Ab dem vollendeten 12. Lebensmonat

f) Einmalige Impfung, ggf. Auffrischung

g) Einmalige Masern-Impfung (MMR) für alle nach 1970 Geborenen ohne ausreichenden Impfschutz

h) Für alle Mädchen im Alter von 12 bis 17 Jahren

i) Jährlich mit aktuellem Impfstoff

Ziel muss sein, möglichst frühzeitig einen vollständigen Impfschutz zu erreichen. Abweichungen sind möglich und ggf. notwendig.

© DEUTSCHES GRÜNES KREUZ e. V. · Nikolaistraße 3 · 35037 Marburg · Telefon 06421 293-0 · Telefax 06421 293-187 · www.dgk.de

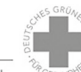

**Abb. 8.10:** Impfkalendar nach den Empfehlungen der Ständigen Impfkommission (STIKO), Deutschland, Stand: August 2013. Der Impfkalendar wird jährlich aktualisiert. (Quelle: Deutsches Grünes Kreuz e.V.; <http://dgk.de>).



**Tab. 8.5:** Indikationsgruppen nach dem WHO-Modell „Die fünf Indikationen der Händedesinfektion“.

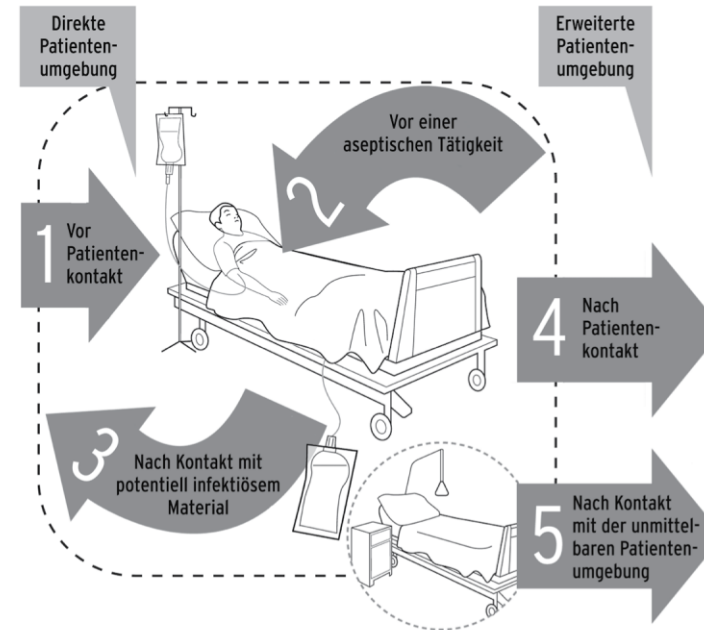

| Indikationsgruppe                                       | Risiko                                                                                                                                                                                                 |
|---------------------------------------------------------|--------------------------------------------------------------------------------------------------------------------------------------------------------------------------------------------------------|
| 1. Vor Patientenkontakt                                 | Übertragung von Mikroorganismen von den Händen des Personals aus der erweiterten Patientenumgebung auf den Patienten                                                                                   |
| 2. Vor aseptischen Tätigkeiten                          | Übertragung von Mikroorganismen von den Händen des Personals in oder auf primär sterile oder nicht besiedelte Bereiche des Patienten (z. B. bei Umgang mit Kathetern, Beatmungszubehör, Schleimhäuten) |
| 3. Nach Kontakt mit potenziell infektiösen Materialien  | Exposition der Hände des Personals gegenüber Körperflüssigkeiten des Patienten, die potenziell infektiös sind                                                                                          |
| 4. Nach Patientenkontakt                                | Übertragung von Mikroorganismen der Patientenflora auf andere Oberflächen und Patienten im Krankenhaus                                                                                                 |
| 5. Nach Kontakt mit der unmittelbaren Patientenumgebung | Übertragung von Mikroorganismen der Patientenflora auf andere Oberflächen und Patienten im Krankenhaus                                                                                                 |

Quelle der Abbildung: „AKTION Saubere Hände“ ASH 2008–2013

| Erregerausbreitung | Maßnahmen                                                                                                                                                                                                           | Beispiele                                                                                             |
|--------------------|---------------------------------------------------------------------------------------------------------------------------------------------------------------------------------------------------------------------|-------------------------------------------------------------------------------------------------------|
| Kontakt            | Vorzugsweise Einzelzimmer;<br>wenn Einzelzimmer nicht möglich,<br>dann Kohortenisolierung im Mehrbett-<br>zimmer; wenn das auch nicht möglich,<br>„Kittel-Handschuh-Pflege“ im Mehr-<br>bettzimmer                  | Infektiöse Durchfallerkrankun-<br>gen, <i>C.difficile</i> -Infektion,<br>multiresistente Erreger      |
| Tröpfcheninfektion | Vorzugsweise Einzelzimmer;<br>wenn Einzelzimmer nicht möglich,<br>Kohortenisolierung im Mehrbettzim-<br>mer; wenn das auch nicht möglich,<br>„Kittel-Handschuh- und Mund-Nasen-<br>schutz-Pflege“ im Mehrbettzimmer | Meningokokken-Infekte,<br>Pneumokokken-Infekte,<br>Pertussis, Diphtherie, Influenza,<br>Mumps, Röteln |
| Luftgetragen       | Einzelzimmer, möglichst mit Unter-<br>druck; Kittel, Handschuhe, FFP2-Maske                                                                                                                                         | Tuberkulose<br>Masern, Varizellen                                                                     |

**Tab. 8.6:** Übersicht über verschiedenen Isolationsmaßnahmen, die sich nach Art der Erregerausbreitung unterscheiden.

**Tab. 9.1:** Anzahl und Prozentsatz der Länder und Territorien in sechs Regionen, unterteilt nach Einkommen und Entwicklungsstand.

| Ländergruppen unterteilt nach: | Region                    |                                 |                                   |                                        |                            |                                |
|--------------------------------|---------------------------|---------------------------------|-----------------------------------|----------------------------------------|----------------------------|--------------------------------|
|                                | Americas<br>(n = 44)      | East Asia & Pacific<br>(n = 36) | Europe & Central Asia<br>(n = 58) | Middle East & North Africa<br>(n = 20) | South Asia<br>(n = 8)      | Sub-Saharan Africa<br>(n = 48) |
| <b>Pro-Kopf-Einkommen</b>      |                           |                                 |                                   |                                        |                            |                                |
| <i>High-income</i>             | 18<br>(40,9 %)            | 12<br>(33,3 %)                  | 37<br>(63,8 %)                    | 7<br>(35,0 %)                          | 0<br>(0,0 %)               | 1 <sup>a</sup><br>(2,1 %)      |
| <i>Upper middle-income</i>     | 18<br>(40,9 %)            | 9<br>(25,0 %)                   | 13<br>(22,4 %)                    | 7<br>(35,0 %)                          | 1 <sup>b</sup><br>(12,5 %) | 7<br>(14,6 %)                  |
| <i>Lower middle-income</i>     | 7<br>(15,9 %)             | 12<br>(33,3 %)                  | 6<br>(10,3 %)                     | 6<br>(30,0 %)                          | 4<br>(50,0 %)              | 13<br>(27,1 %)                 |
| <i>Low-income</i>              | 1 <sup>c</sup><br>(2,3 %) | 3<br>(8,4 %)                    | 2<br>(3,5 %)                      | 0<br>(0,0 %)                           | 3<br>(37,5 %)              | 27<br>(56,2 %)                 |
| <b>Entwicklungsstand</b>       |                           |                                 |                                   |                                        |                            |                                |
| <i>Least developed</i>         | 1 <sup>c</sup><br>(2,3 %) | 9 <sup>d</sup><br>(25,0 %)      | 0<br>(0,0 %)                      | 2 <sup>e</sup><br>(10,0 %)             | 4 <sup>f</sup><br>(50,0 %) | 33 <sup>g</sup><br>(68,8 %)    |

<sup>a</sup> Äquatorialguinea

<sup>b</sup> Malediven

<sup>c</sup> Haiti

<sup>d</sup> Kambodscha, Kiribati, Laos, Myanmar, Osttimor, Samoa, Salomon Inseln, Tuvalu, Vanuatu

<sup>e</sup> Dschibuti, Jemen

<sup>f</sup> Afghanistan, Bangladesch, Bhutan, Nepal

<sup>g</sup> Angola, Äquatorialguinea, Äthiopien, Benin, Burkina Faso, Burundi, Eritrea, Gambia, Guinea, Guinea-Bissau, Komoren, Kongo (Dem. Republik), Lesotho, Liberia, Madagaskar, Malawi, Mali, Mauretanien, Mosambik, Niger, Ruanda, Sambia, São Tomé und Príncipe, Senegal, Sierra Leone, Somalia, Sudan, Südsudan, Tansania, Togo, Tschad, Uganda, Zentralafrikanische Republik

Quelle: World Bank list of economies. The World Bank, July 2013

**Tab. 9.2:** Verschiedene Gesundheitsindikatoren (Mortalität, DALYs, Lebenserwartung, HALE) in ausgewählten Ländern (Quelle: Global Health Observatory Database. WHO, 2010).

| Einkommensgruppe<br>Ausgewählte Länder | Mortalitätsraten<br>(pro 1.000 Lebendgeburten bzw.<br>pro 100.000 Einwohner) |        |            | Alters-<br>standardi-<br>sierte*<br>DALYs<br>(pro<br>100.000<br>Einwohner) | Lebenser-<br>wartung<br>bei der<br>Geburt<br>(Jahre) | Lebenser-<br>wartung in<br>Gesundheit<br>= HALE<br>(Jahre) |
|----------------------------------------|------------------------------------------------------------------------------|--------|------------|----------------------------------------------------------------------------|------------------------------------------------------|------------------------------------------------------------|
|                                        | Säuglinge                                                                    | Kinder | Erwachsene |                                                                            |                                                      |                                                            |
| High-income (OECD)                     |                                                                              |        |            |                                                                            |                                                      |                                                            |
| • Deutschland                          | 4                                                                            | 4      | 78         | 10.081                                                                     | 80                                                   | 73                                                         |
| • Österreich                           | 4                                                                            | 4      | 75         | 10.223                                                                     | 80                                                   | 72                                                         |
| • Schweiz                              | 4                                                                            | 5      | 60         | 9.277                                                                      | 82                                                   | 75                                                         |
| • USA                                  | 7                                                                            | 8      | 107        | 12.844                                                                     | 78                                                   | 70                                                         |
| High-income (non OECD)                 |                                                                              |        |            |                                                                            |                                                      |                                                            |
| • Kroatien                             | 4                                                                            | 5      | 115        | 12.531                                                                     | 76                                                   | 68                                                         |
| • Saudi-Arabien                        | 18                                                                           | 21     | 154        | 17.639                                                                     | 72                                                   | 62                                                         |
| • Singapur                             | 2                                                                            | 3      | 64         | 10.111                                                                     | 82                                                   | 72                                                         |
| Higher middle-income                   |                                                                              |        |            |                                                                            |                                                      |                                                            |
| • Brasilien                            | 18                                                                           | 22     | 158        | 20.112                                                                     | 73                                                   | 64                                                         |
| • Südafrika                            | 48                                                                           | 67     | 520        | 46.237                                                                     | 53                                                   | 48                                                         |
| • Türkei                               | 20                                                                           | 22     | 150        | 16.307                                                                     | 74                                                   | 66                                                         |
| Lower middle-income                    |                                                                              |        |            |                                                                            |                                                      |                                                            |
| • Bolivien                             | 46                                                                           | 54     | 196        | 25.423                                                                     | 67                                                   | 58                                                         |
| • Philippinen                          | 26                                                                           | 32     | 174        | 21.603                                                                     | 70                                                   | 62                                                         |
| • Indien                               | 52                                                                           | 69     | 213        | 27.825                                                                     | 64                                                   | 56                                                         |
| Low-income                             |                                                                              |        |            |                                                                            |                                                      |                                                            |
| • Bangladesch                          | 43                                                                           | 54     | 238        | 27.532                                                                     | 65                                                   | 56                                                         |
| • Haiti                                | 54                                                                           | 72     | 267        | 36.012                                                                     | 62                                                   | 54                                                         |
| • Malawi                               | 65                                                                           | 100    | 481        | 55.548                                                                     | 53                                                   | 44                                                         |

Daten von 2008, 2007 (HALE) bzw. 2004 (DALY)

\* Standardisiert auf Global Standard Population der WHO.  
DALY: Disability Adjusted Life Years; HALE: Healthy Life Expectancy

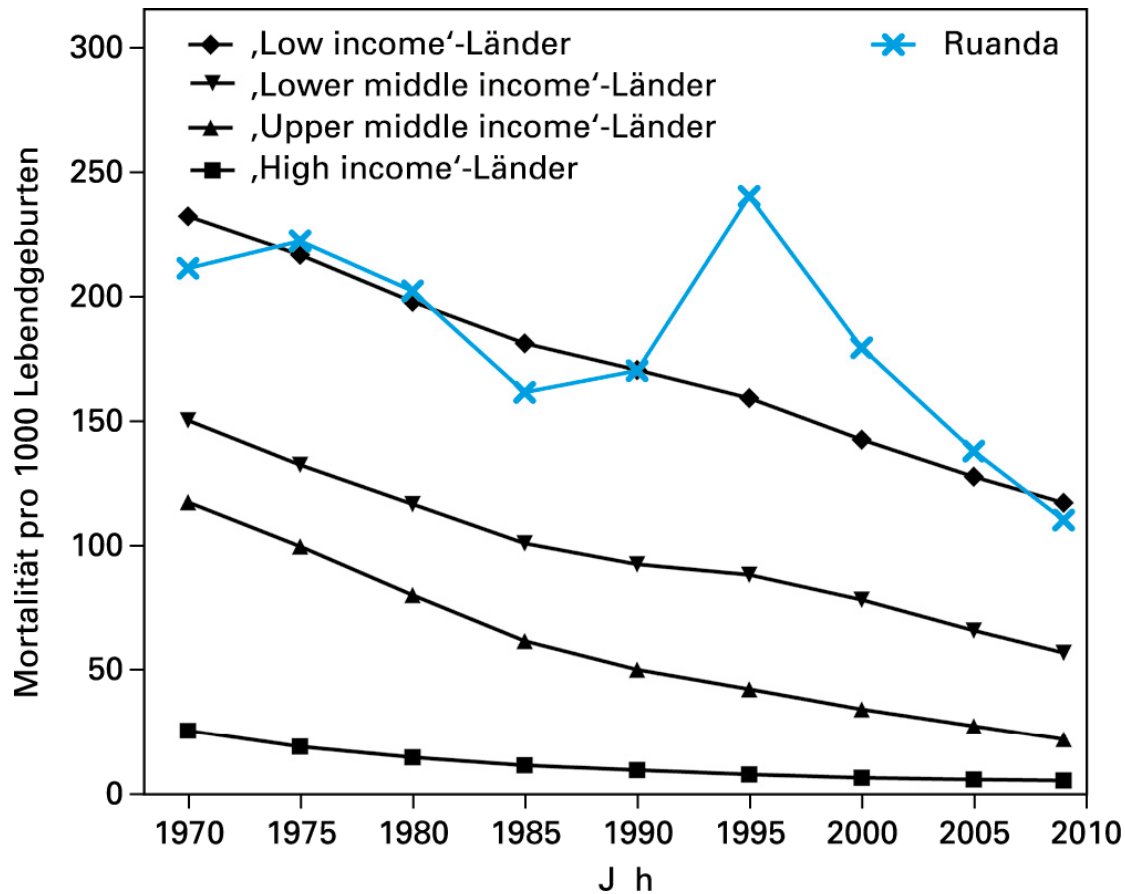

**Abb. 9.1:** Verlauf der Kindersterblichkeit in 194 nach ihrem Einkommen gruppierten Ländern (1970 bis 2009). Die grüne Kurve zeigt den besonderen Verlauf in Ruanda (Quelle: World Development Indicators. The World Bank, 2010).

| Todesursache          | Prozent aller Todesfälle (Rang) |                            |                            |                    |               |
|-----------------------|---------------------------------|----------------------------|----------------------------|--------------------|---------------|
|                       | <i>Low income</i>               | <i>Lower middle income</i> | <i>Upper middle income</i> | <i>High income</i> | <i>Global</i> |
| Pneumonie             | 18 % (1)                        | 19 % (1)                   | 12 % (3)                   | 4 % (5)            | 18 % (1)      |
| Durchfallerkrankung   | 18 % (1)                        | 14 % (2)                   | 6 % (6)                    | 1 % (7)            | 15 % (2)      |
| Frühgeburtlichkeit    | 10 % (4)                        | 13 % (3)                   | 20 % (1)                   | 27 % (1)           | 12 % (3)      |
| Geburtskomplikationen | 8 % (5)                         | 10 % (4)                   | 9 % (5)                    | 6 % (4)            | 9 % (4)       |
| Malaria               | 12 % (3)                        | 7 % (5)                    | 0 % (9)                    | 0 % (8)            | 8 % (5)       |
| Neonatale Sepsis      | 6 % (6)                         | 6 % (6)                    | 4 % (8)                    | 2 % (6)            | 6 % (6)       |
| Fehlbildungen         | 3 % (7)                         | 4 % (7)                    | 14 % (2)                   | 25 % (2)           | 4 % (7)       |
| Unfälle               | 3 % (7)                         | 3 % (8)                    | 5 % (7)                    | 9 % (3)            | 3 % (8)       |
| HIV/AIDS              | 3 % (7)                         | 1 % (10)                   | 10 % (4)                   | 0 % (8)            | 2 % (9)       |
| Masern                | 1 % (10)                        | 2 % (9)                    | 0 % (9)                    | 0 % (8)            | 1 % (10)      |
| Andere Ursachen       | 18 %                            | 21 %                       | 20 %                       | 25 %               | 20 %          |

**Tab. 9.3:** Verteilung der häufigsten Todesursachen bei Kindern unter 5 Jahren im Jahr 2008 – global gesehen und unterschieden nach einkommensabhängigen Ländergruppen (Quelle: World Health Organization. World Health Statistics 2010).

**Abb. 9.2:** Verlauf der altersstandardisierten Gesamtmortalität bei Erwachsenen im Alter von 15–60 Jahren in den nach ihrem Einkommen gruppierten Ländern (1970 bis 2005). Die grüne Kurve zeigt den besonderen Verlauf in Russland (Russische Sozialistische Föderative Sowjetrepublik, seit 1992 russischen Föderation) (Quelle: World Development Indicators. The World Bank, 2010).

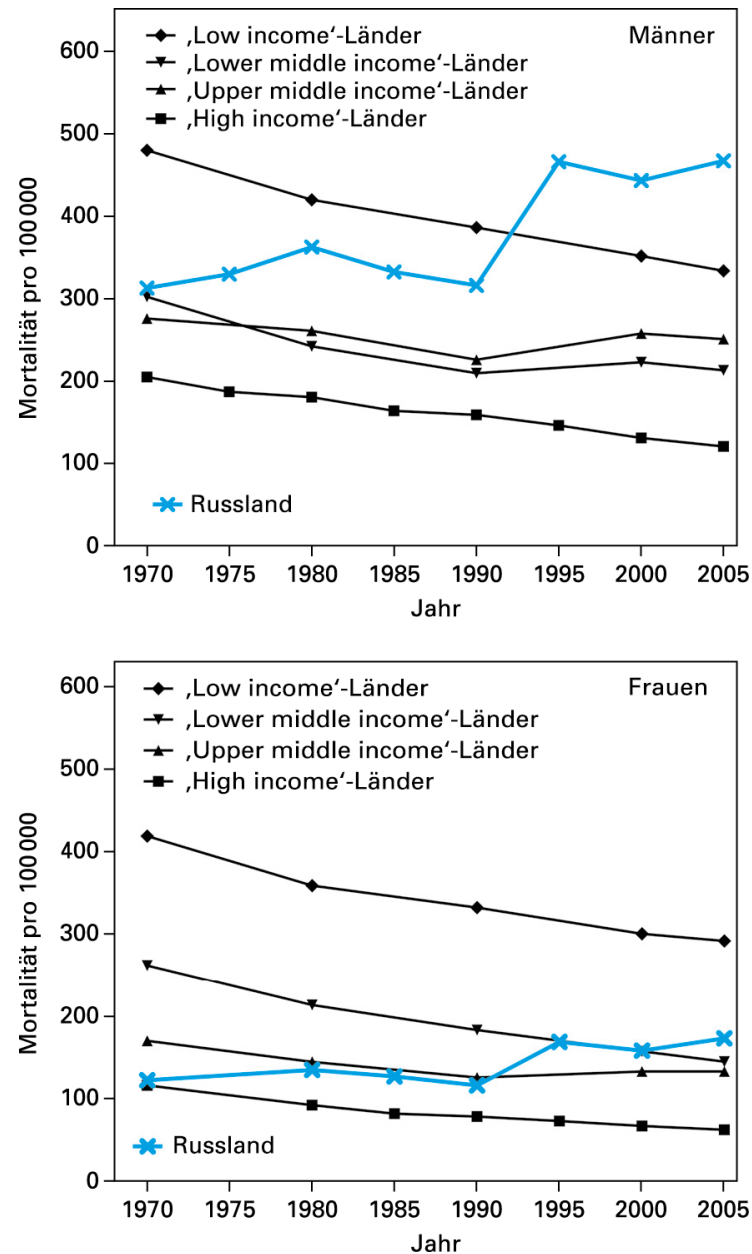

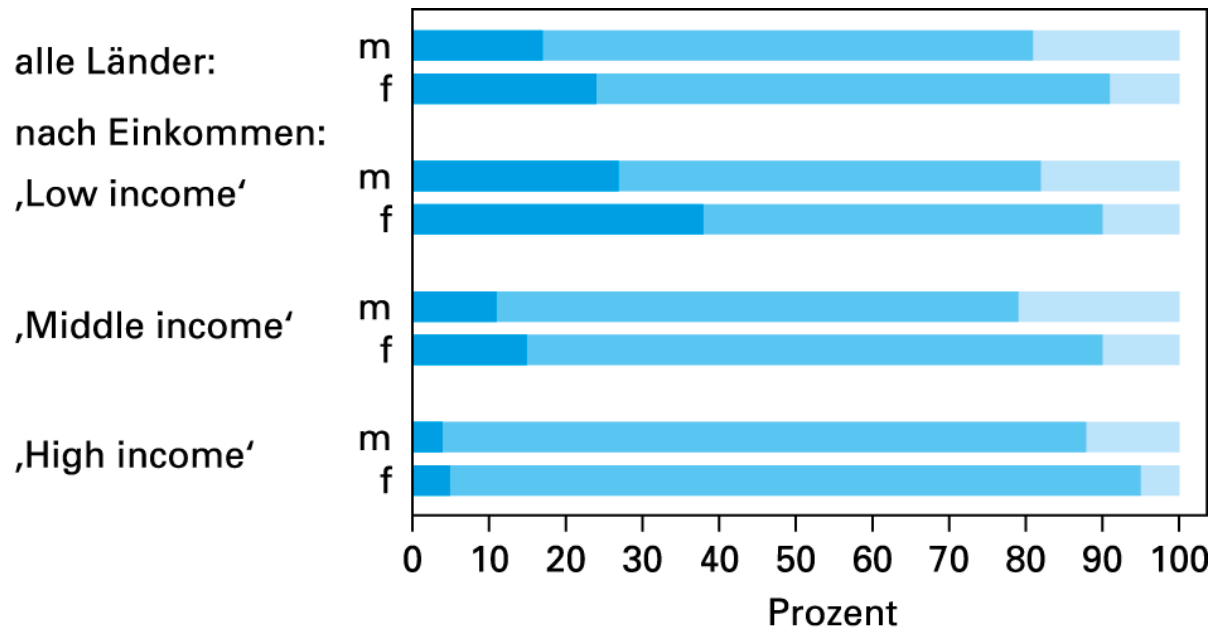

Ursachen:

- Infektionen, mütterliche und ernährungsbedingte Ursachen
- nicht übertragbare Krankheiten
- Unfälle und Verletzungen

**Abb. 9.3:** Prozentuale Verteilung der Krankheitslast in DALYs (verlorene gesunde Lebensjahre) global und nach einkommensabhängigen Ländergruppen. Die Daten aus dem Jahr 2004 unterscheiden jeweils zwischen Männern (m) und Frauen (f) und beziehen sich auf die Altersgruppe der über 15-Jährigen (Quelle: Global Health Observatory Database. WHO, 2010).



**Tab. 9.4:** Verteilung der Ursachen für verlorene gesunde Lebensjahre (DALYs) weltweit und in nach Einkommen unterschiedenen Ländergruppen. Die Daten beziehen sich auf alle Altersgruppen und auf das Jahr 2004.

| Rang                                  | Ursache                        | % aller DALYs | Rang                                | Ursache                                            | % aller DALYs |
|---------------------------------------|--------------------------------|---------------|-------------------------------------|----------------------------------------------------|---------------|
| Welt (1.523 Mio. DALYs)               |                                |               | Low income-Länder (828 Mio. DALYs)  |                                                    |               |
| 1                                     | Pneumonien                     | 6,2           | 1                                   | Pneumonien                                         | 9,3           |
| 2                                     | Durchfallerkrankungen          | 4,8           | 2                                   | Durchfallerkrankungen                              | 7,2           |
| 3                                     | Unipolare Depression           | 4,3           | 3                                   | HIV/AIDS                                           | 5,2           |
| 4                                     | Ischämische Herzkrankheit      | 4,1           | 4                                   | Malaria                                            | 4,0           |
| 5                                     | HIV/AIDS                       | 3,8           | 5                                   | Frühgeburtlichkeit                                 | 3,9           |
| 6                                     | Zerebrovaskuläre Erkrankungen  | 3,1           | 6                                   | Neonatale Infektionen                              | 3,8           |
| 7                                     | Frühgeburtlichkeit             | 2,9           | 7                                   | Geburtskomplikationen                              | 3,6           |
| 8                                     | Geburtskomplikationen          | 2,7           | 8                                   | Unipolare Depression                               | 3,2           |
| 9                                     | Verkehrsunfälle                | 2,7           | 9                                   | Ischämische Herzkrankheiten                        | 3,1           |
| 10                                    | Perinatale Infektionen         | 2,7           | 10                                  | Tuberkulose                                        | 2,7           |
| Middle income-Länder (573 Mio. DALYs) |                                |               | High-income-Länder (122 Mio. DALYs) |                                                    |               |
| 1                                     | Unipolare Depression           | 5,1           | 1                                   | Unipolare Depression                               | 8,2           |
| 2                                     | Ischämische Herzkrankheiten    | 5,0           | 2                                   | Ischämische Herzkrankheiten                        | 6,3           |
| 3                                     | Zerebrovaskuläre Erkrankungen  | 4,8           | 3                                   | Zerebrovaskuläre Erkrankung                        | 3,9           |
| 4                                     | Verkehrsunfälle                | 3,7           | 4                                   | Alzheimer und andere Demenzformen                  | 3,6           |
| 5                                     | Pneumonien                     | 2,8           | 5                                   | Alkoholassozierte Erkrankungen                     | 3,4           |
| 6                                     | COPD                           | 2,8           | 6                                   | Hörverlust im Erwachsenenalter                     | 3,4           |
| 7                                     | HIV/AIDS                       | 2,6           | 7                                   | COPD                                               | 3,0           |
| 8                                     | Alkoholassozierte Erkrankungen | 2,6           | 8                                   | Diabetes mellitus                                  | 3,0           |
| 9                                     | Unkorrigierte Ametropien       | 2,4           | 9                                   | Bösartige Tumoren von Trachea, Bronchien und Lunge | 3,0           |
| 10                                    | Durchfallerkrankungen          | 2,3           | 10                                  | Verkehrsunfälle                                    | 2,6           |

Quelle: World Health Organization, 2009
